# Supplementary material for: Valorization of Traditional Italian Walnut (Juglans regia L.) Production: Genetic, Nutritional and Sensory Characterization of Locally Grown Varieties in the Trentino Region
Source: MDPI journal article supplement (doi:10.3390/plants11151986), 2022-07-30

ms28.0332

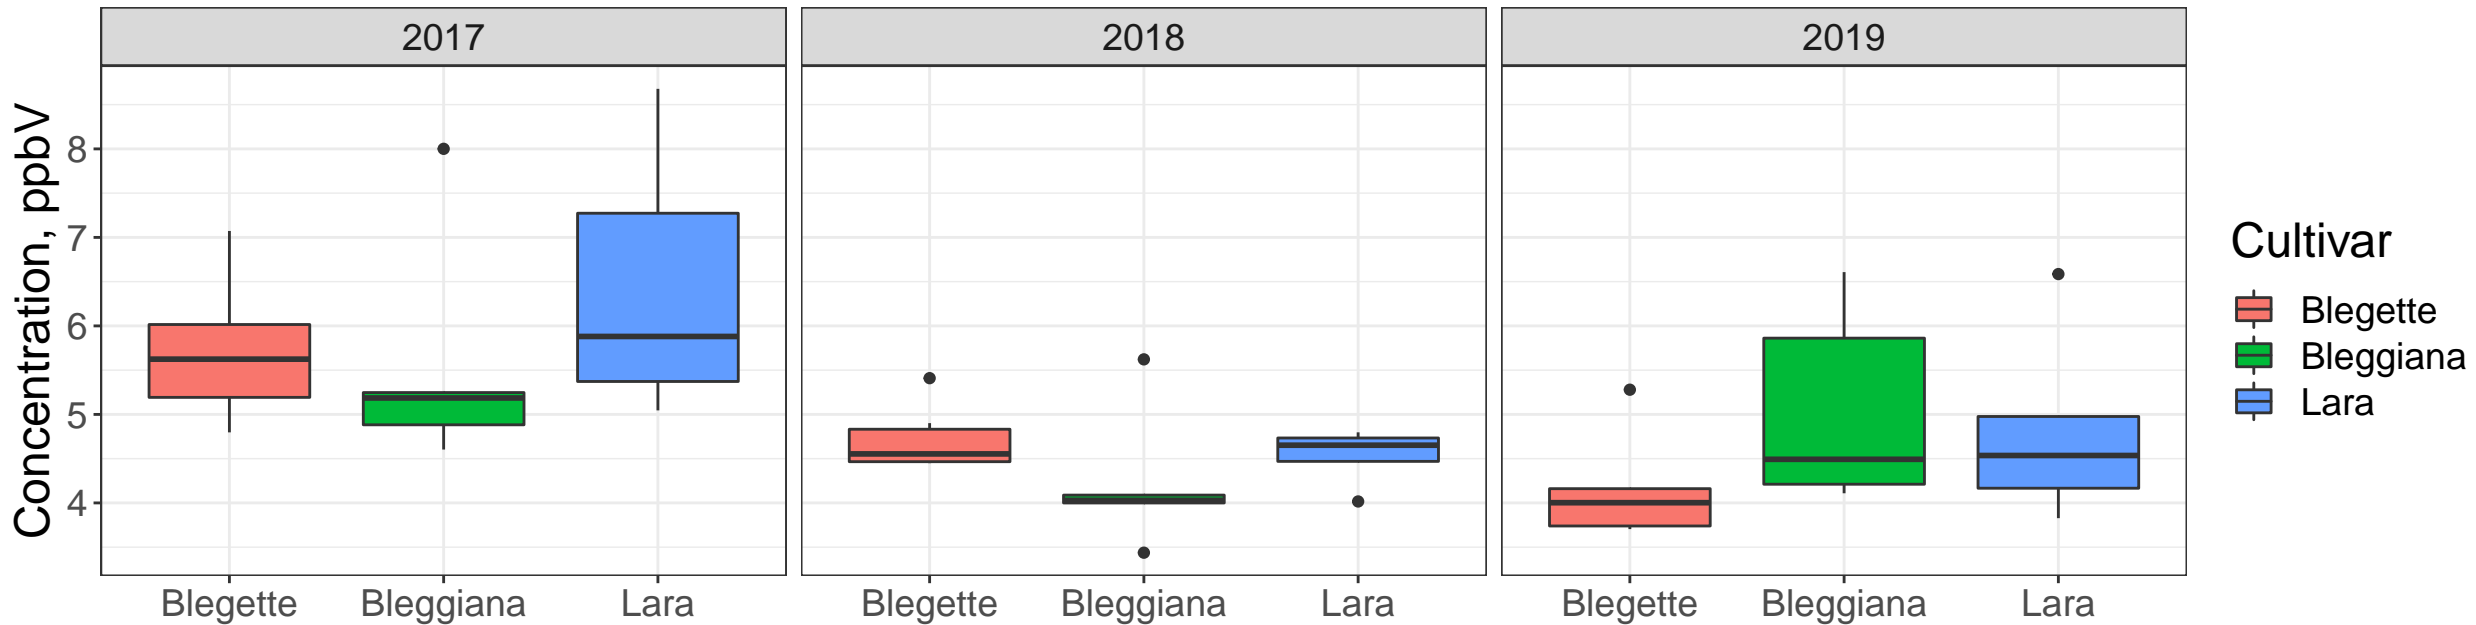

ms31.0183

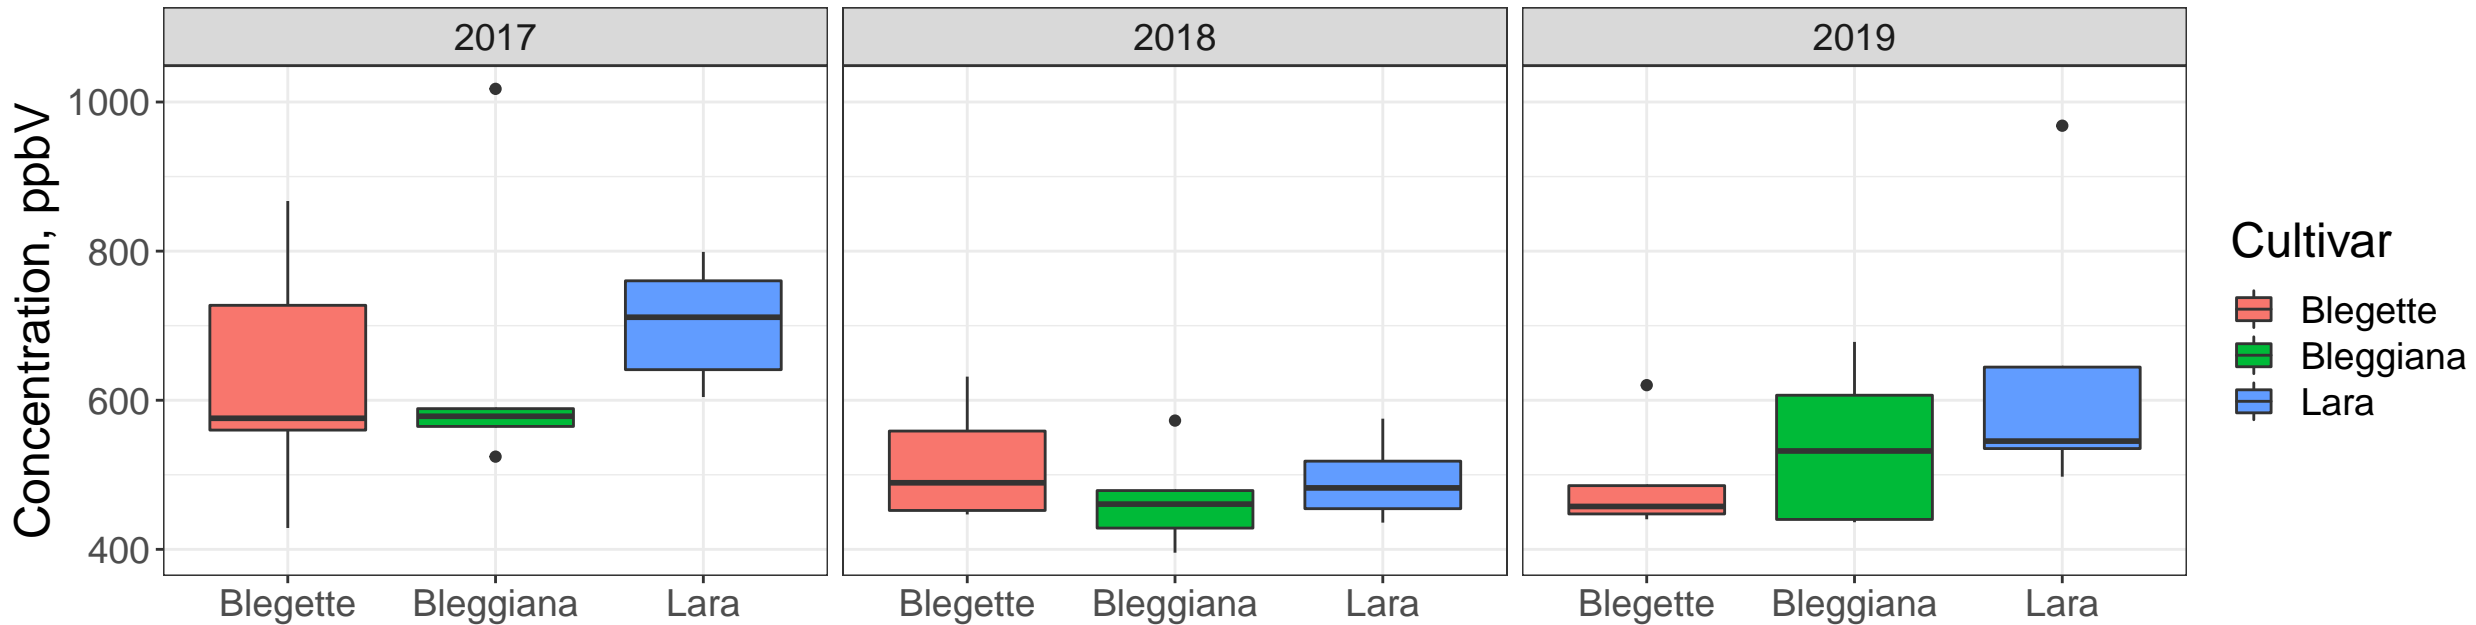

# ms33.0334

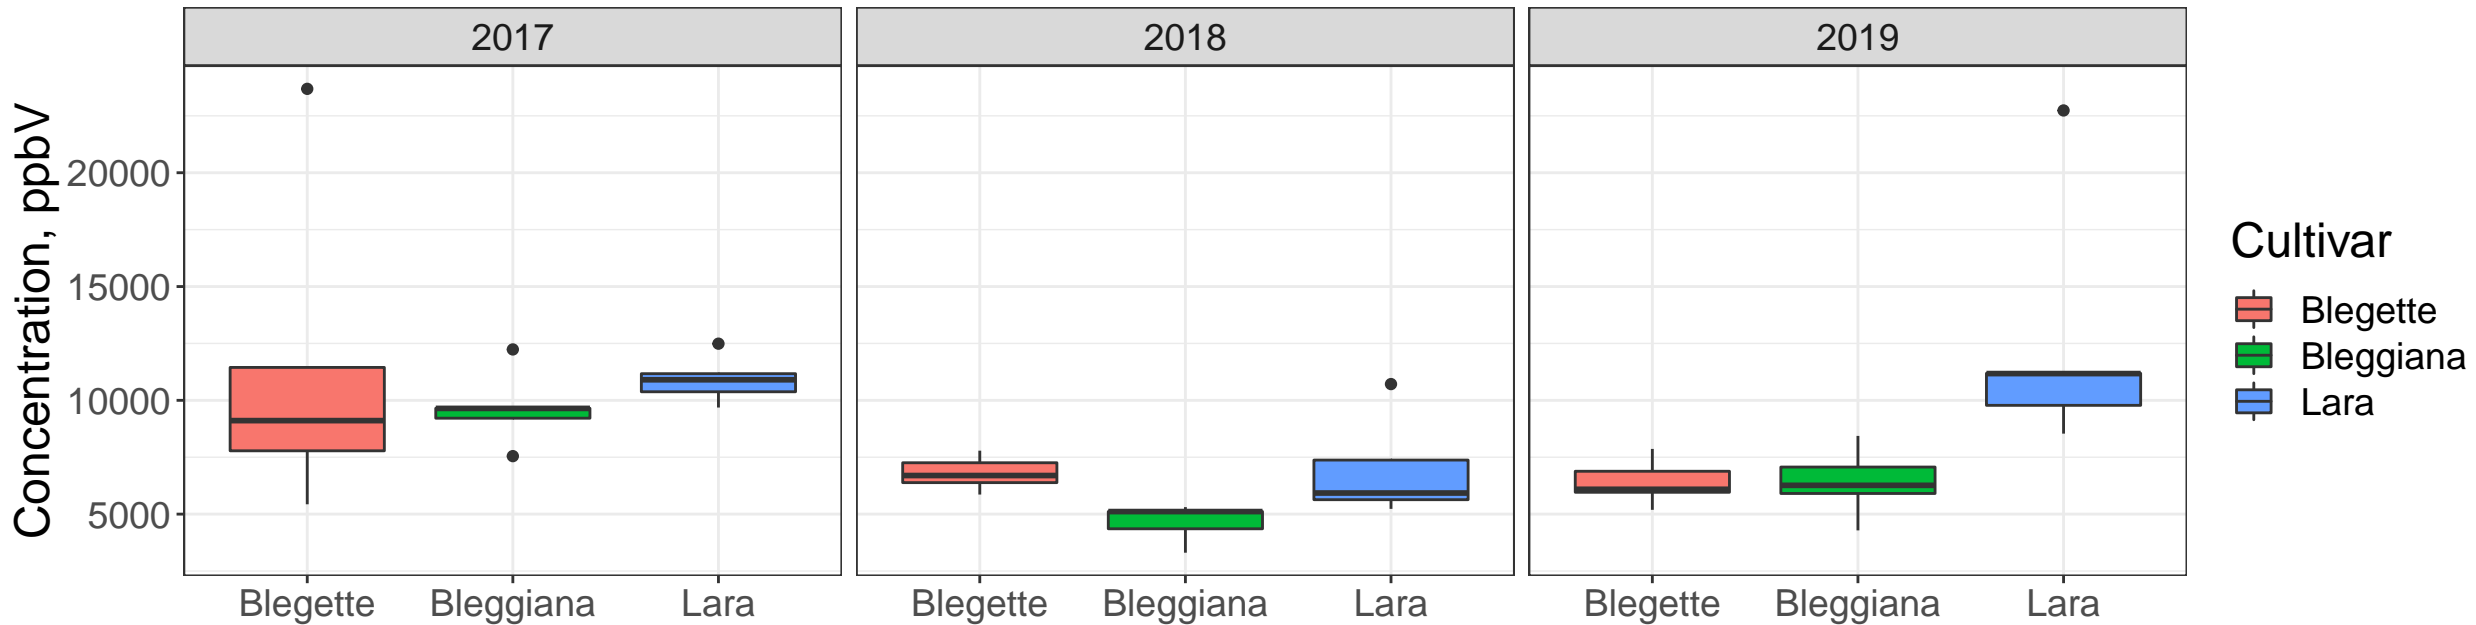

ms34.9957

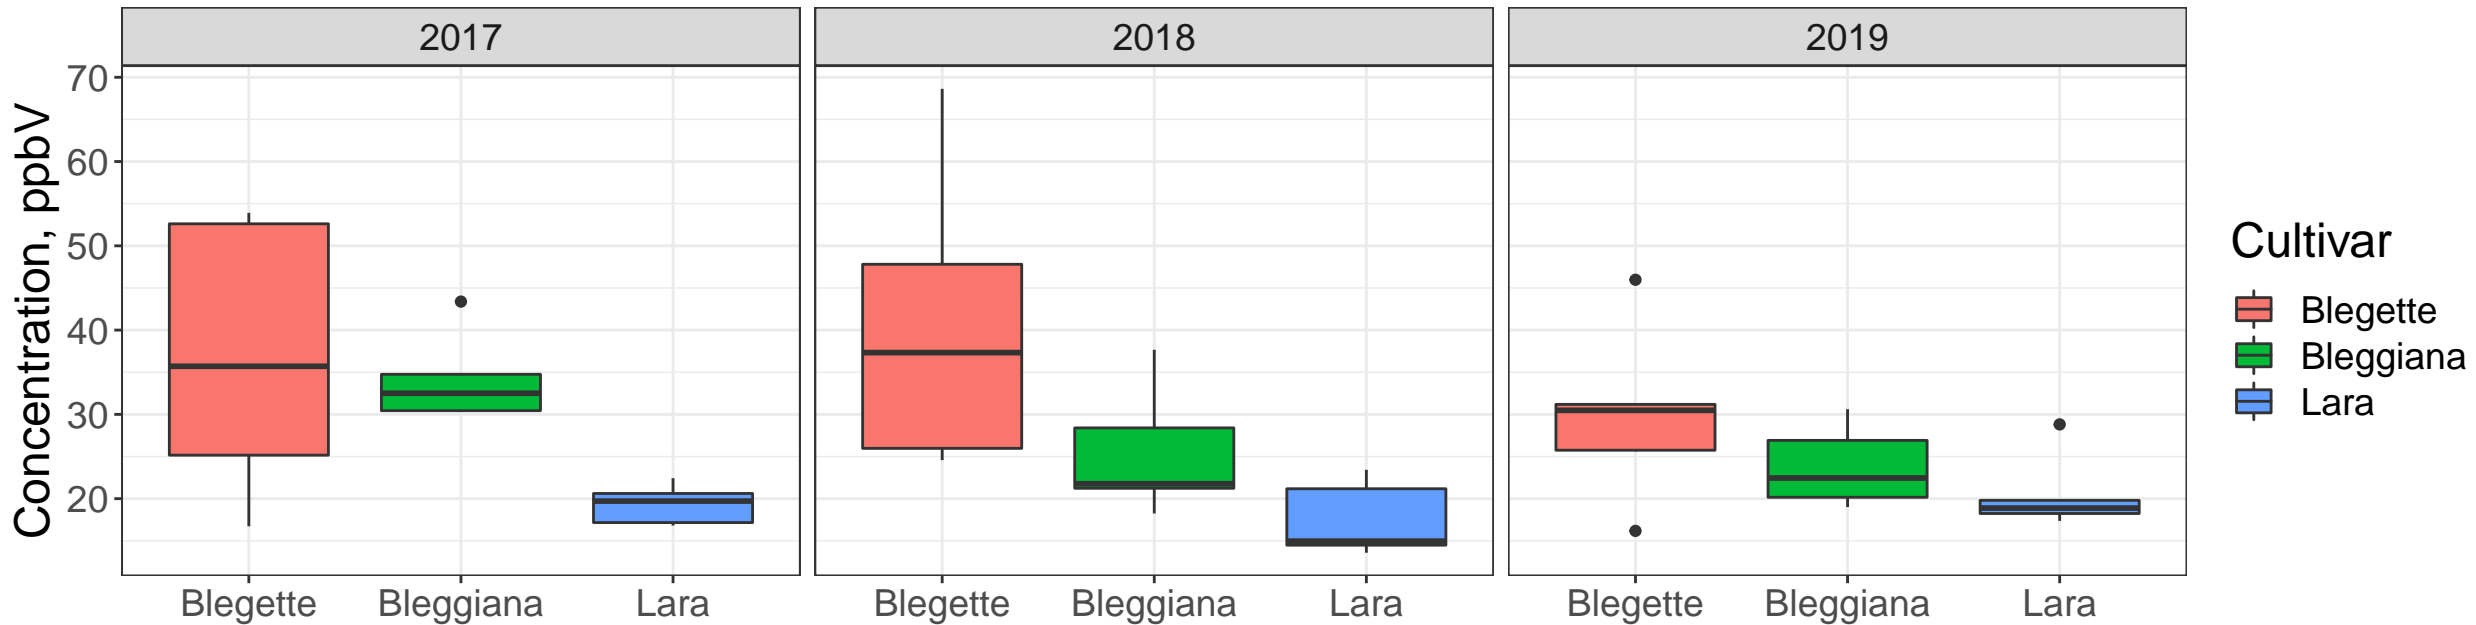

# ms39.0230

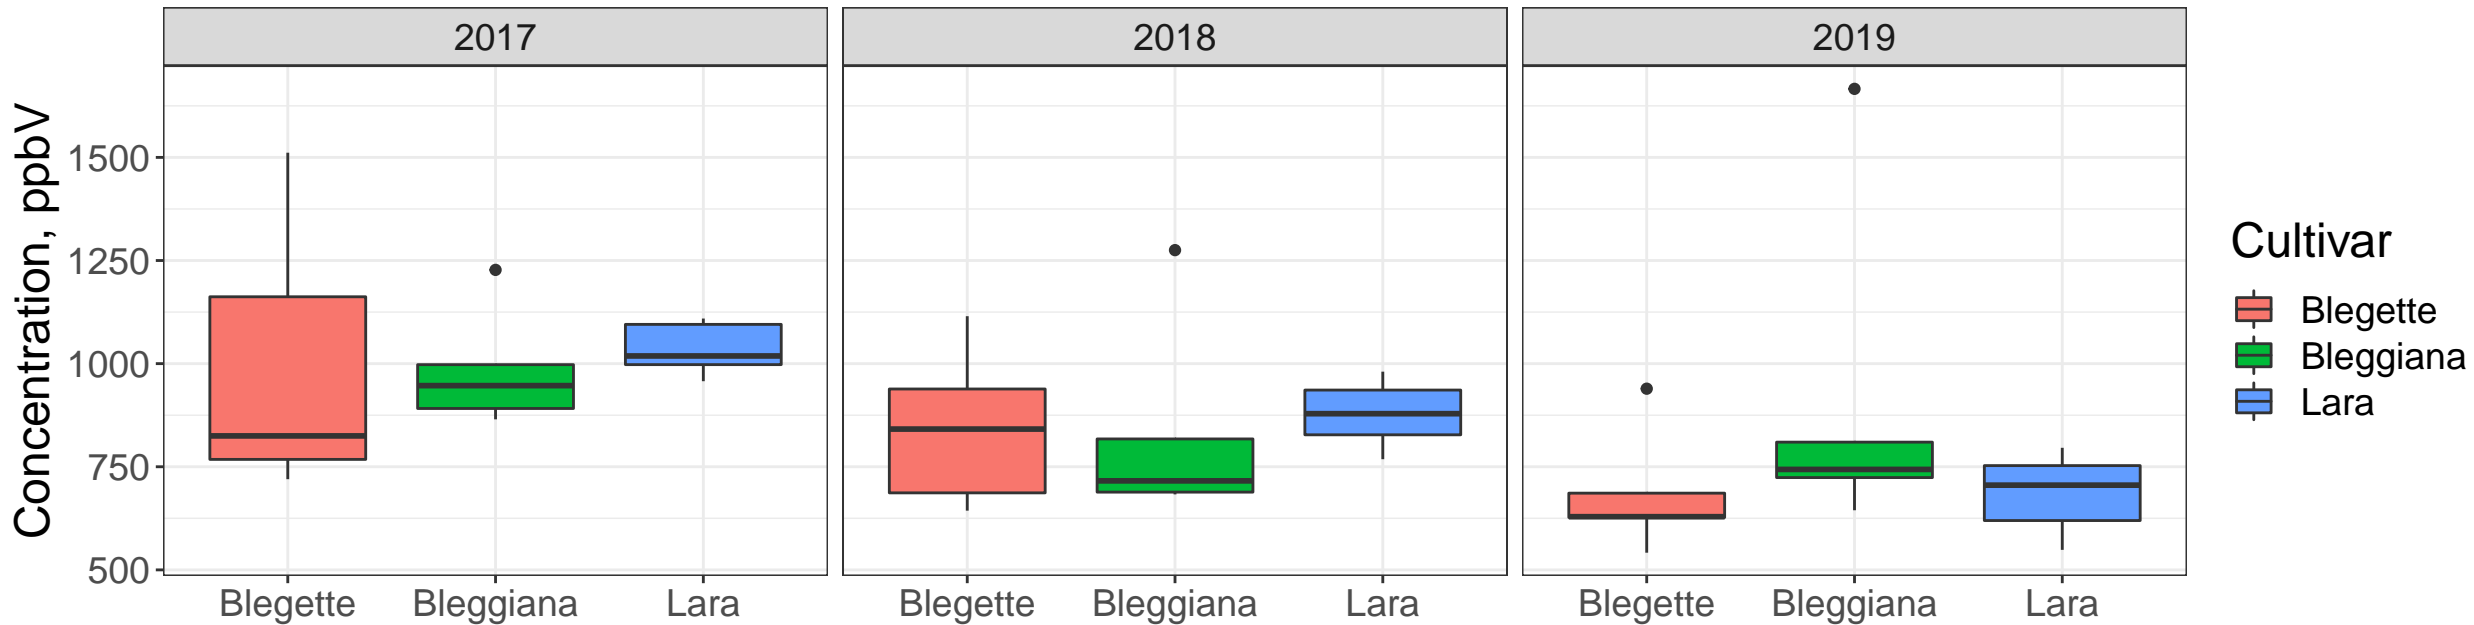

ms41.0389

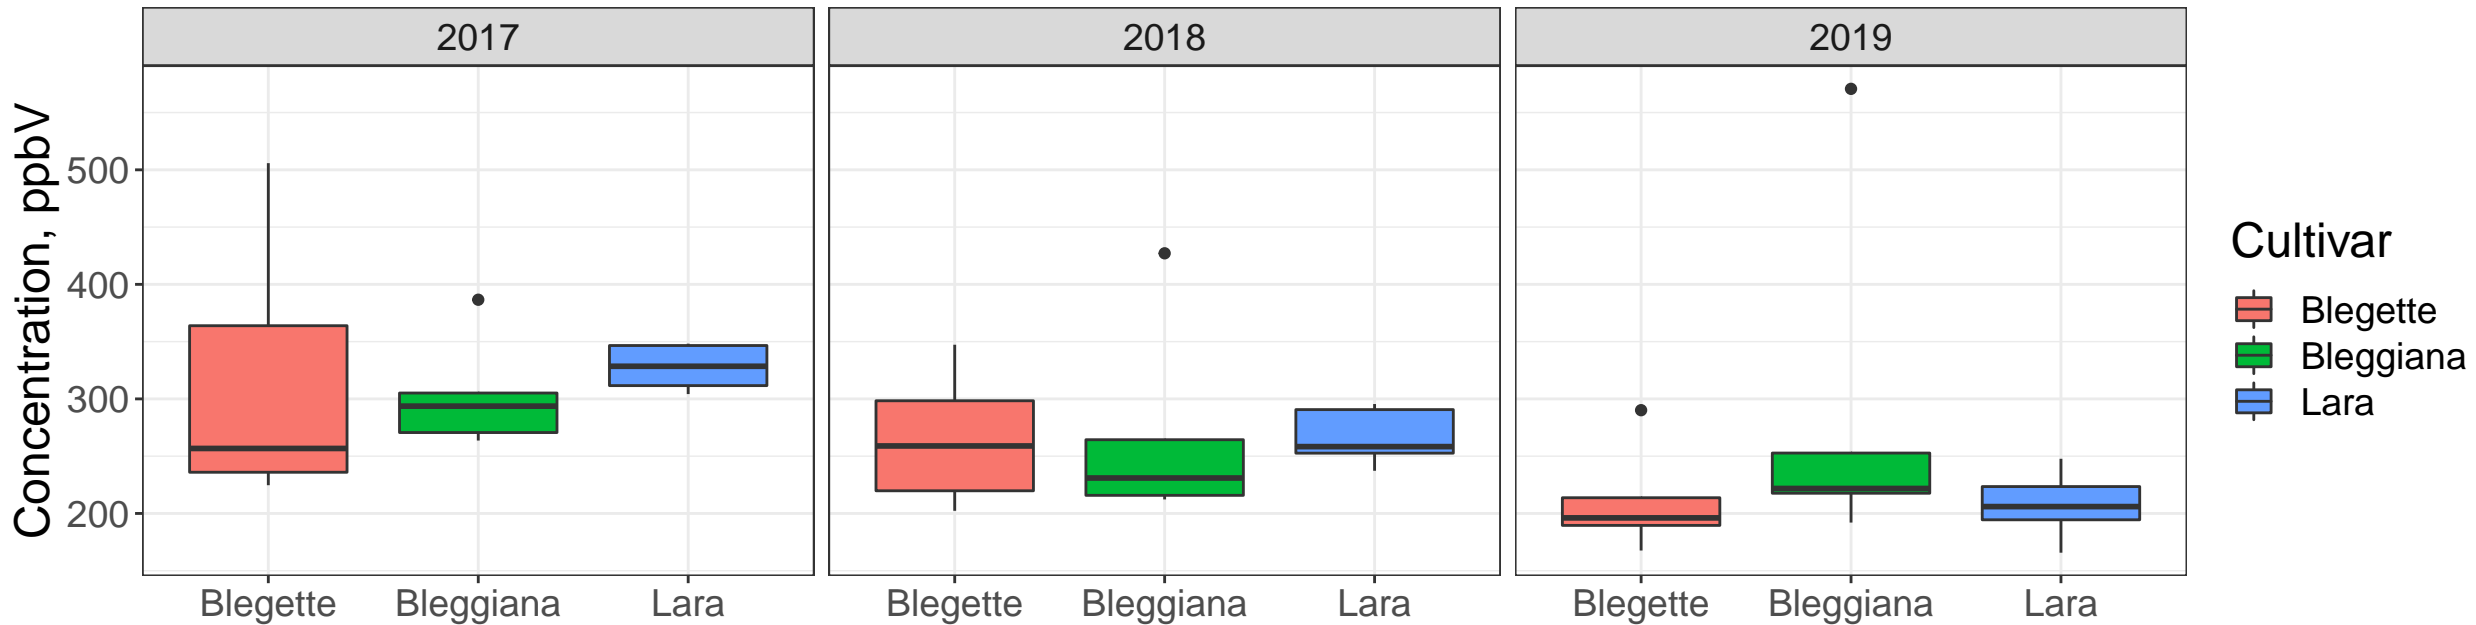

# ms42.0107

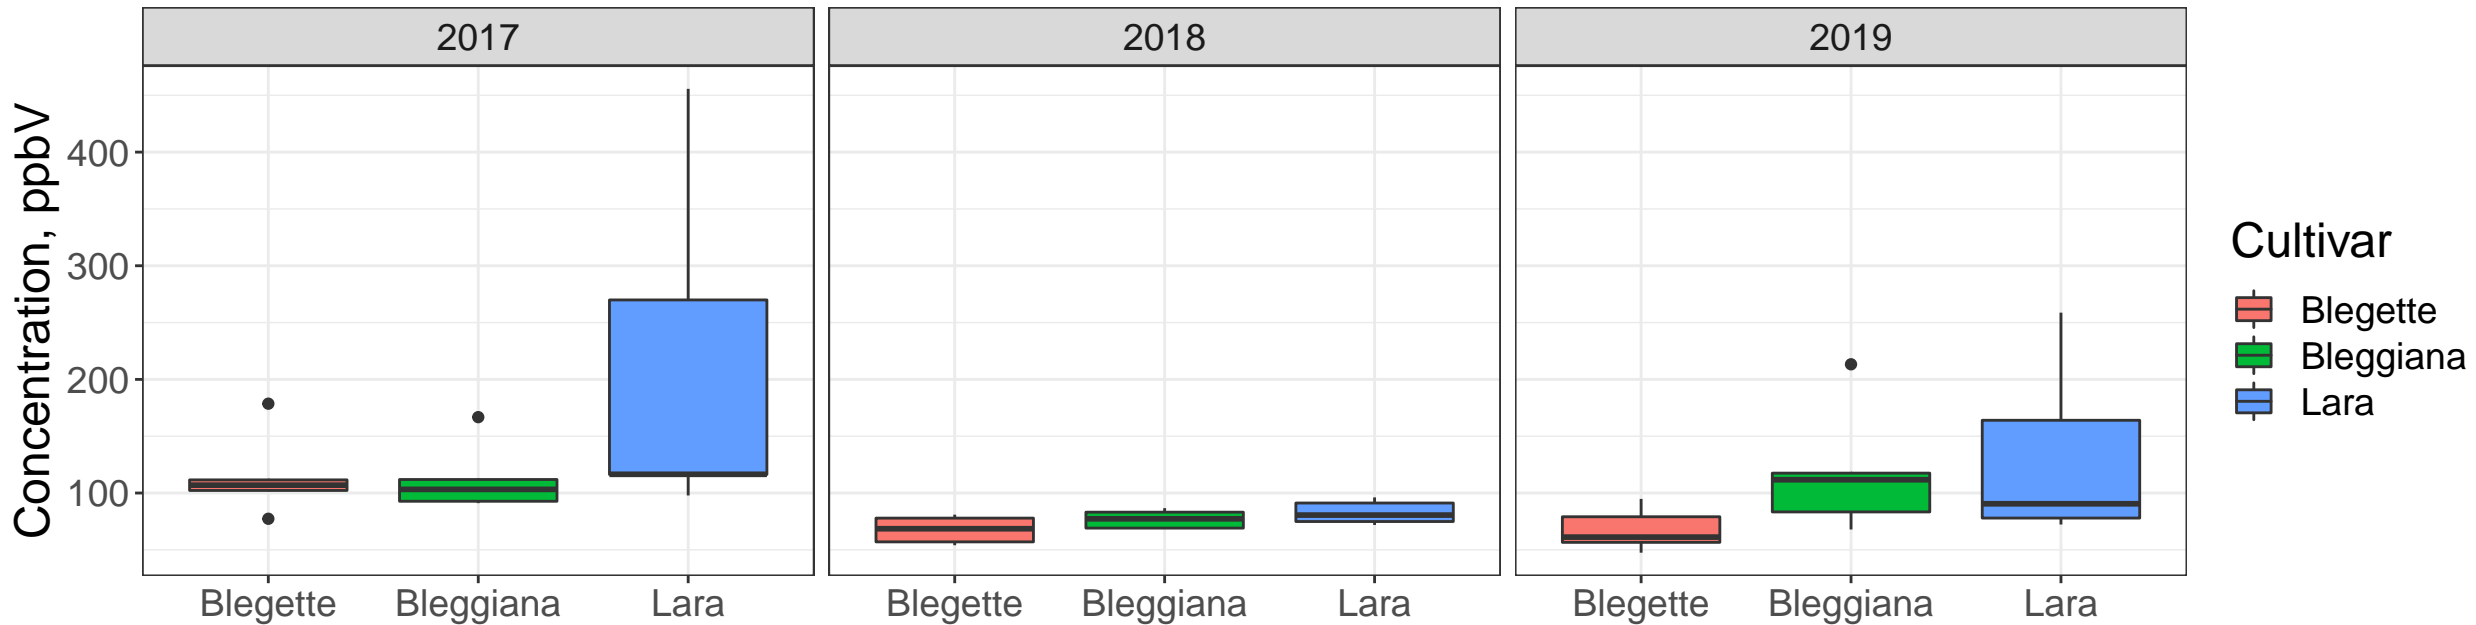

# ms42.0418

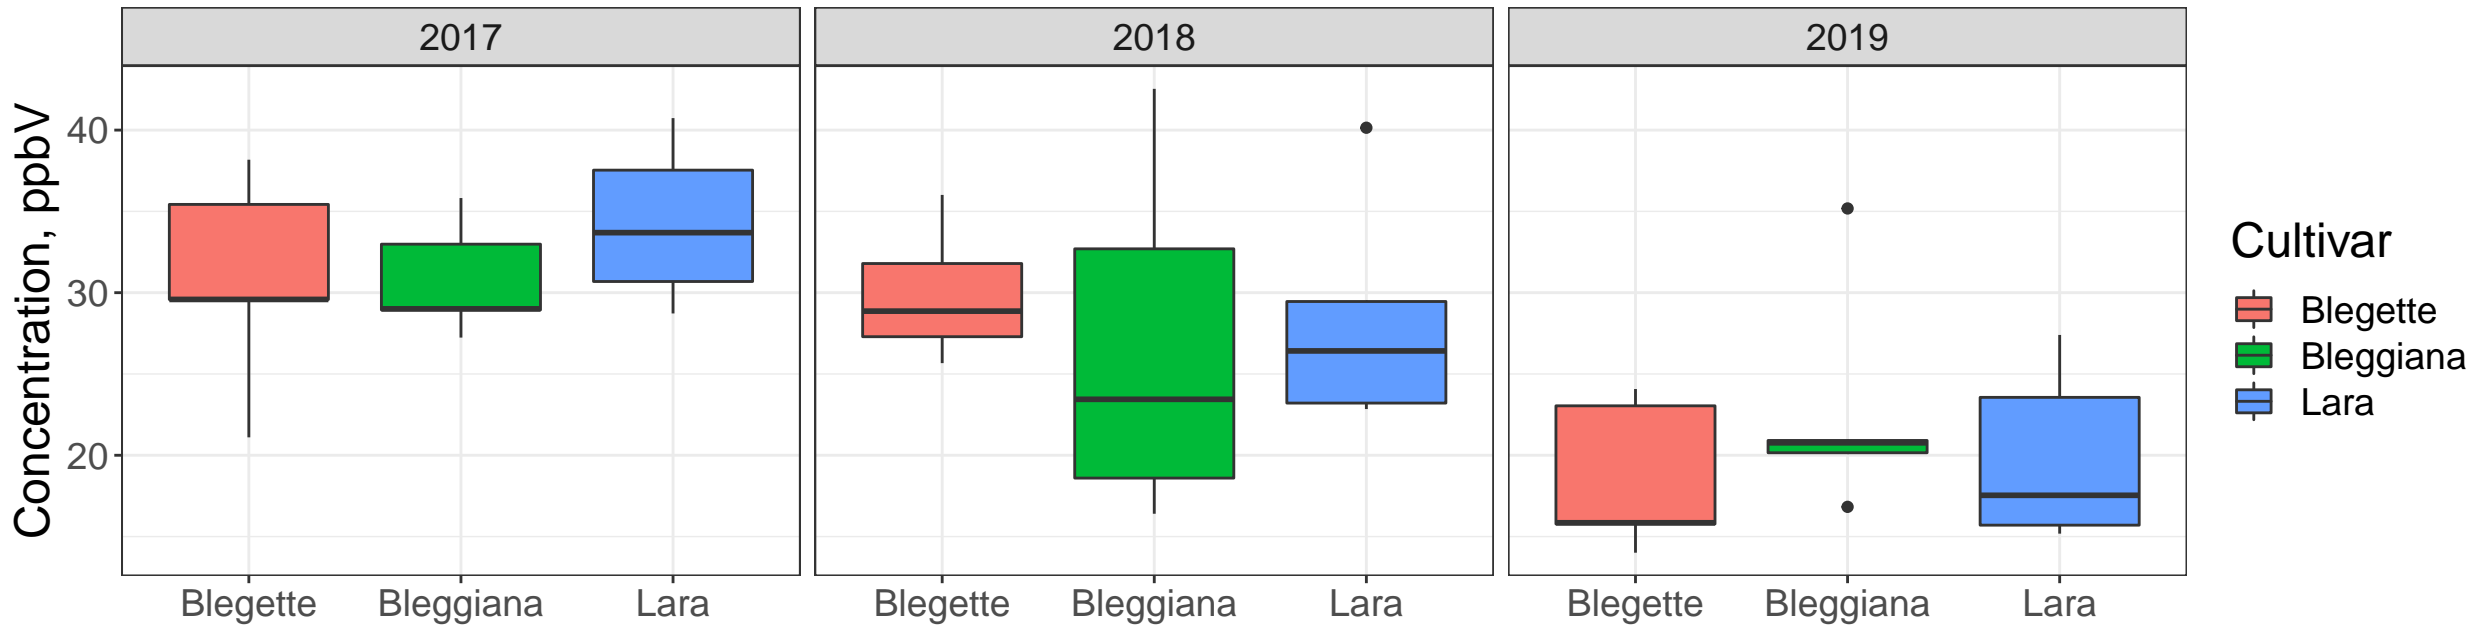



ms43.0179

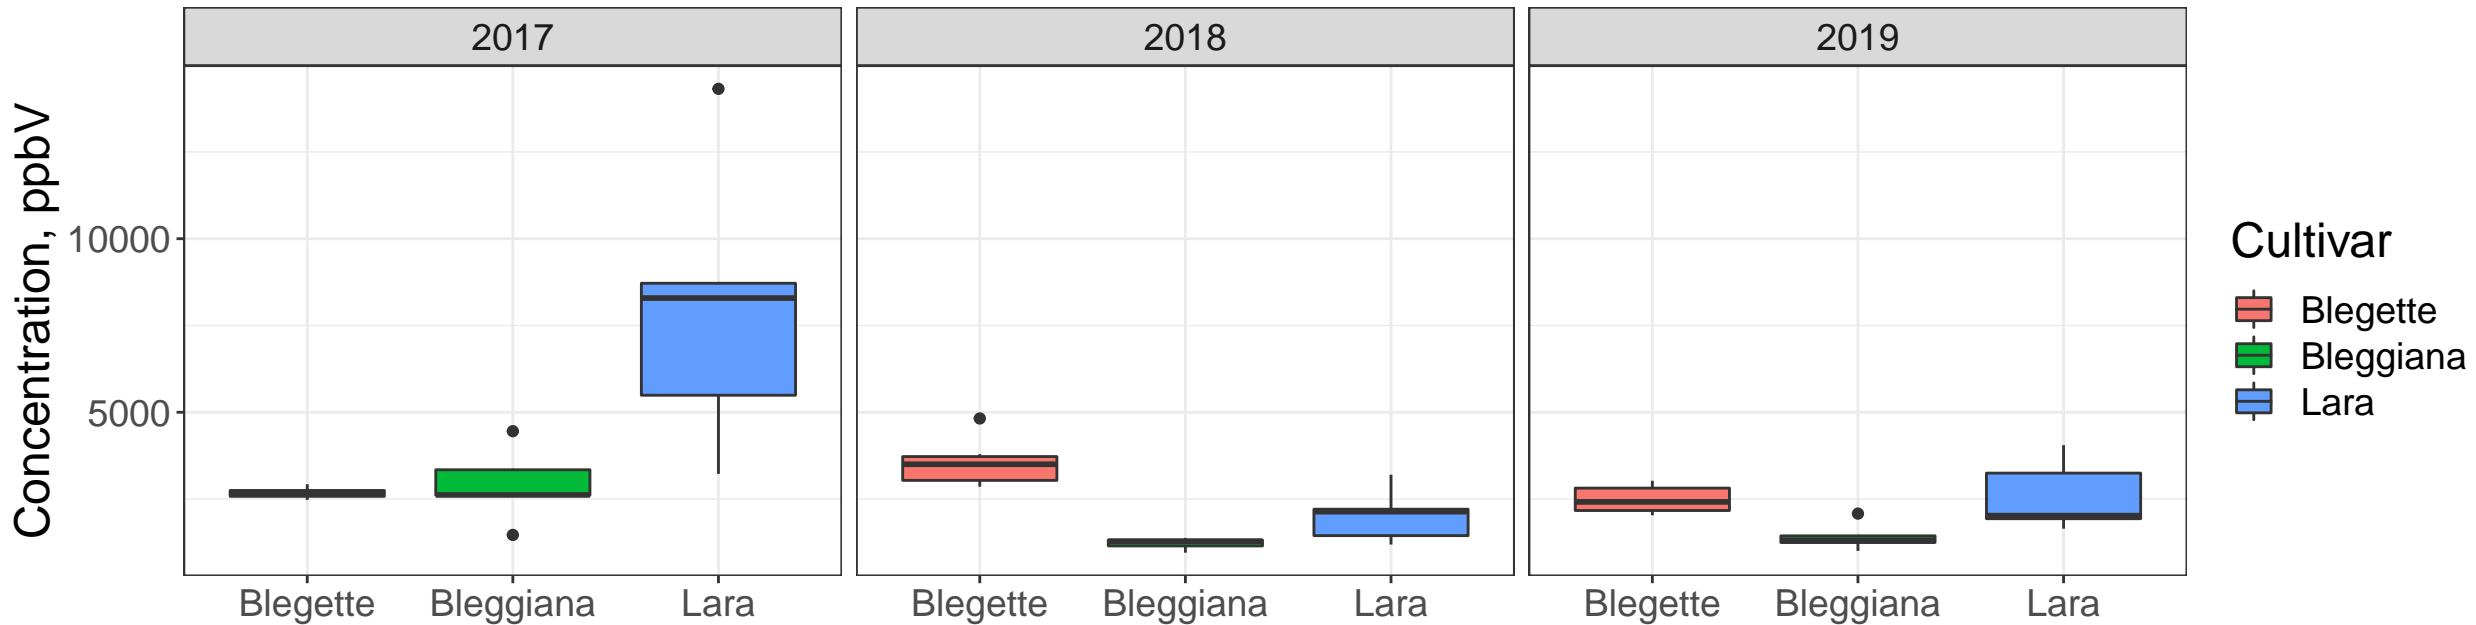

## ms43.0545

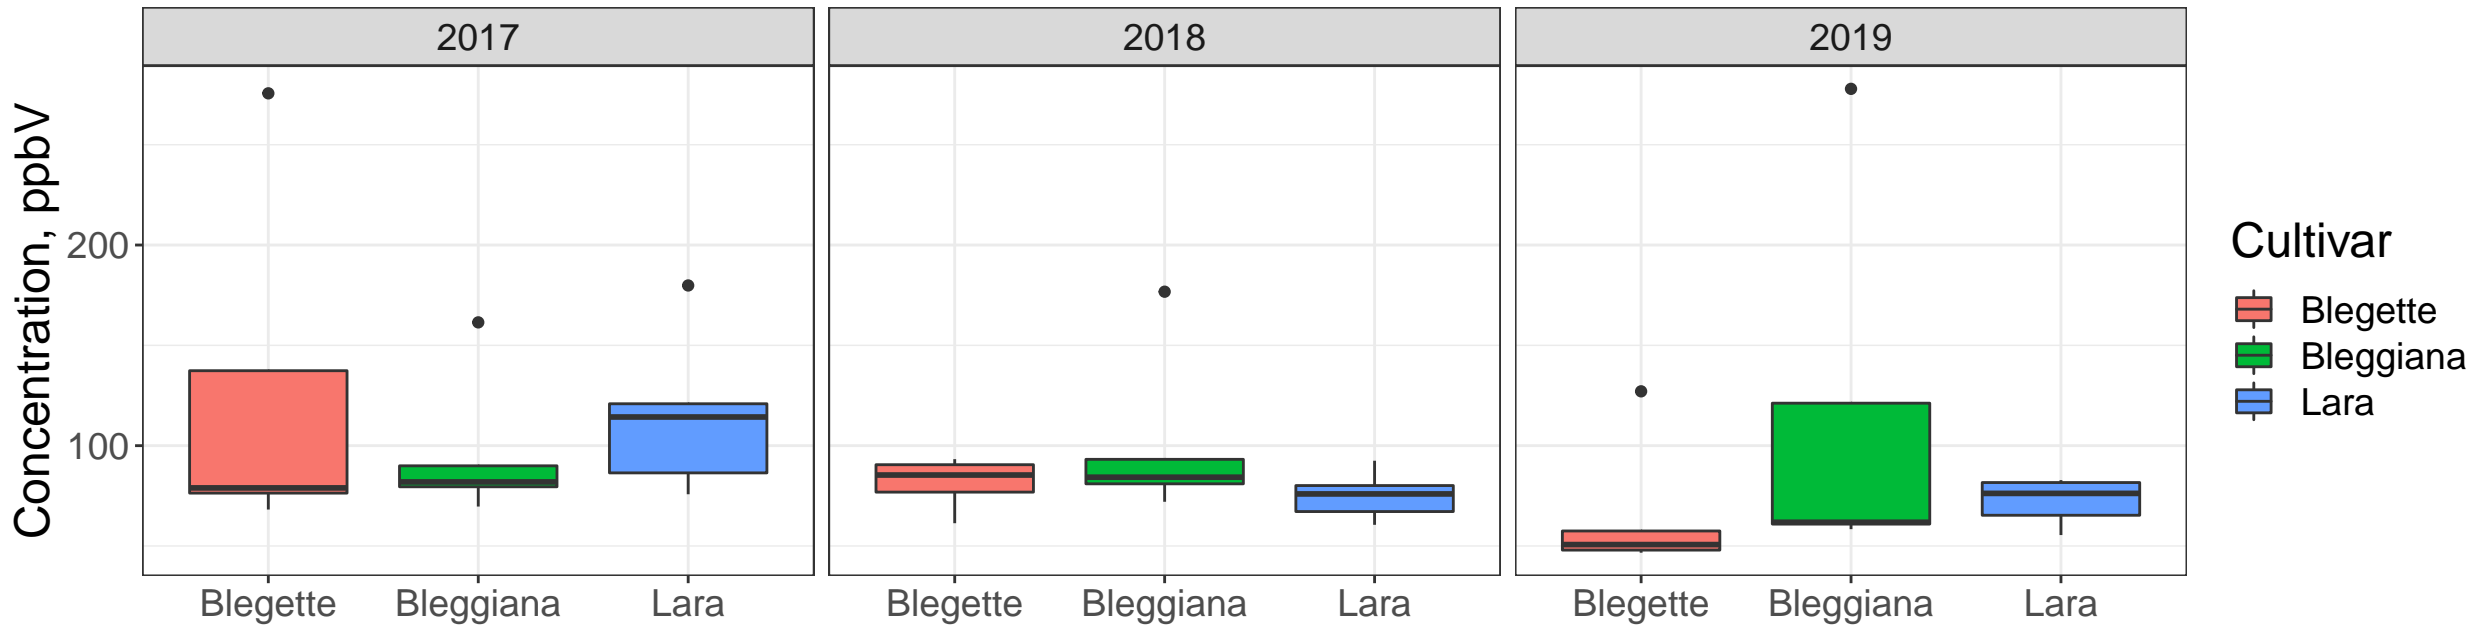

# ms45.0334

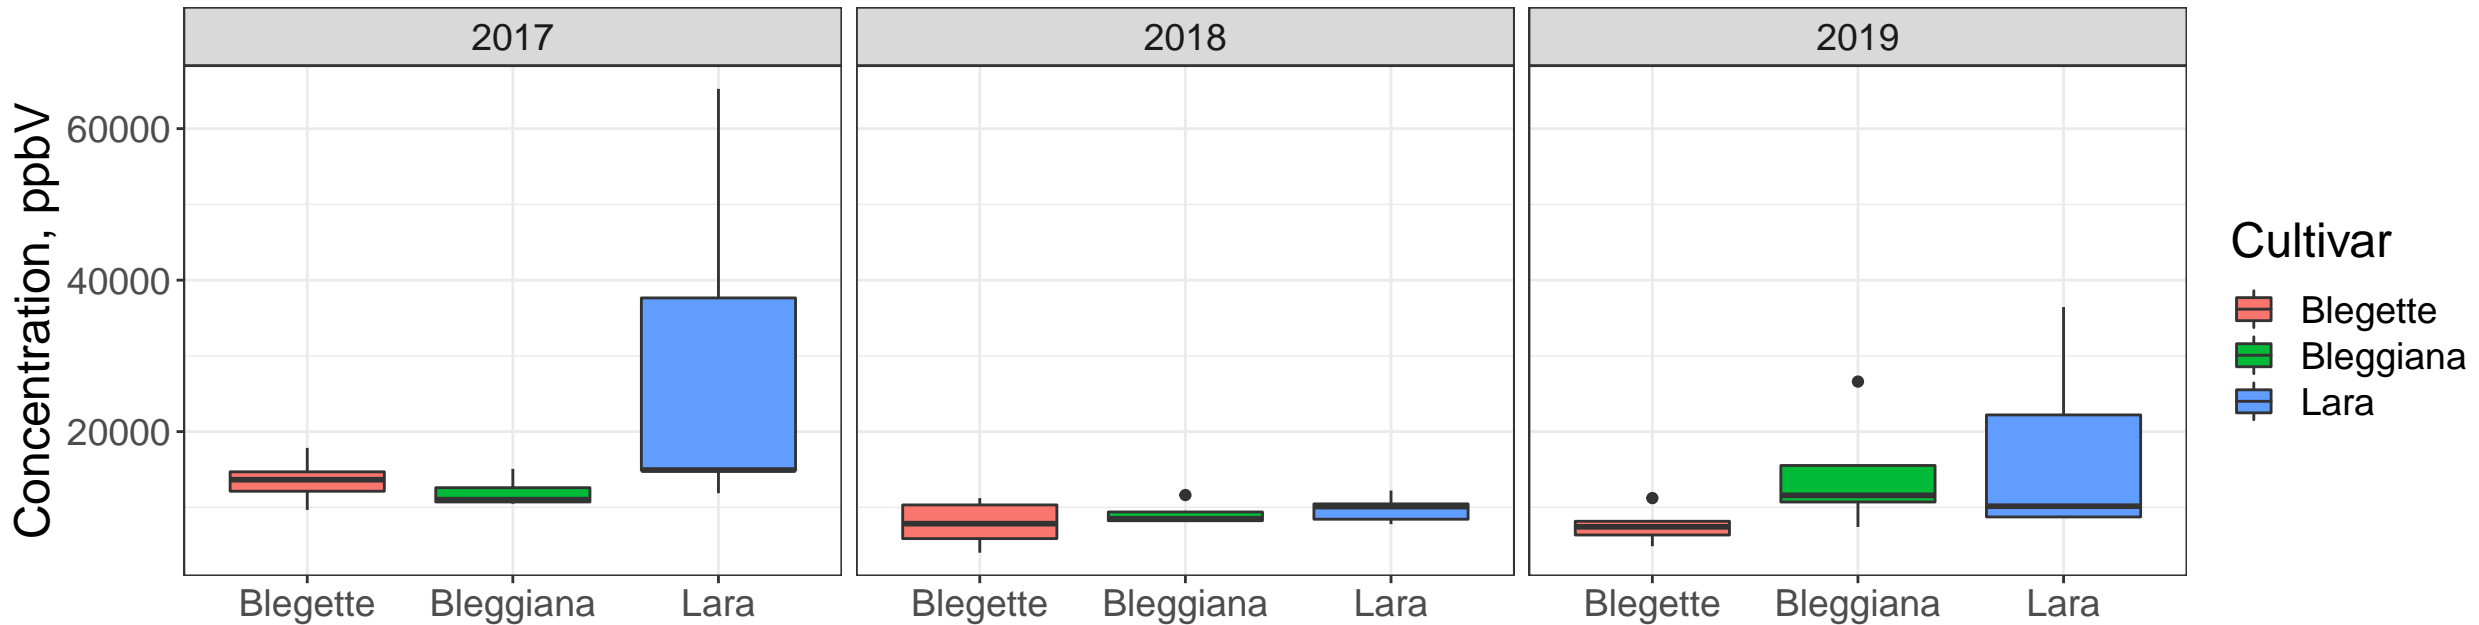

# ms47.0491

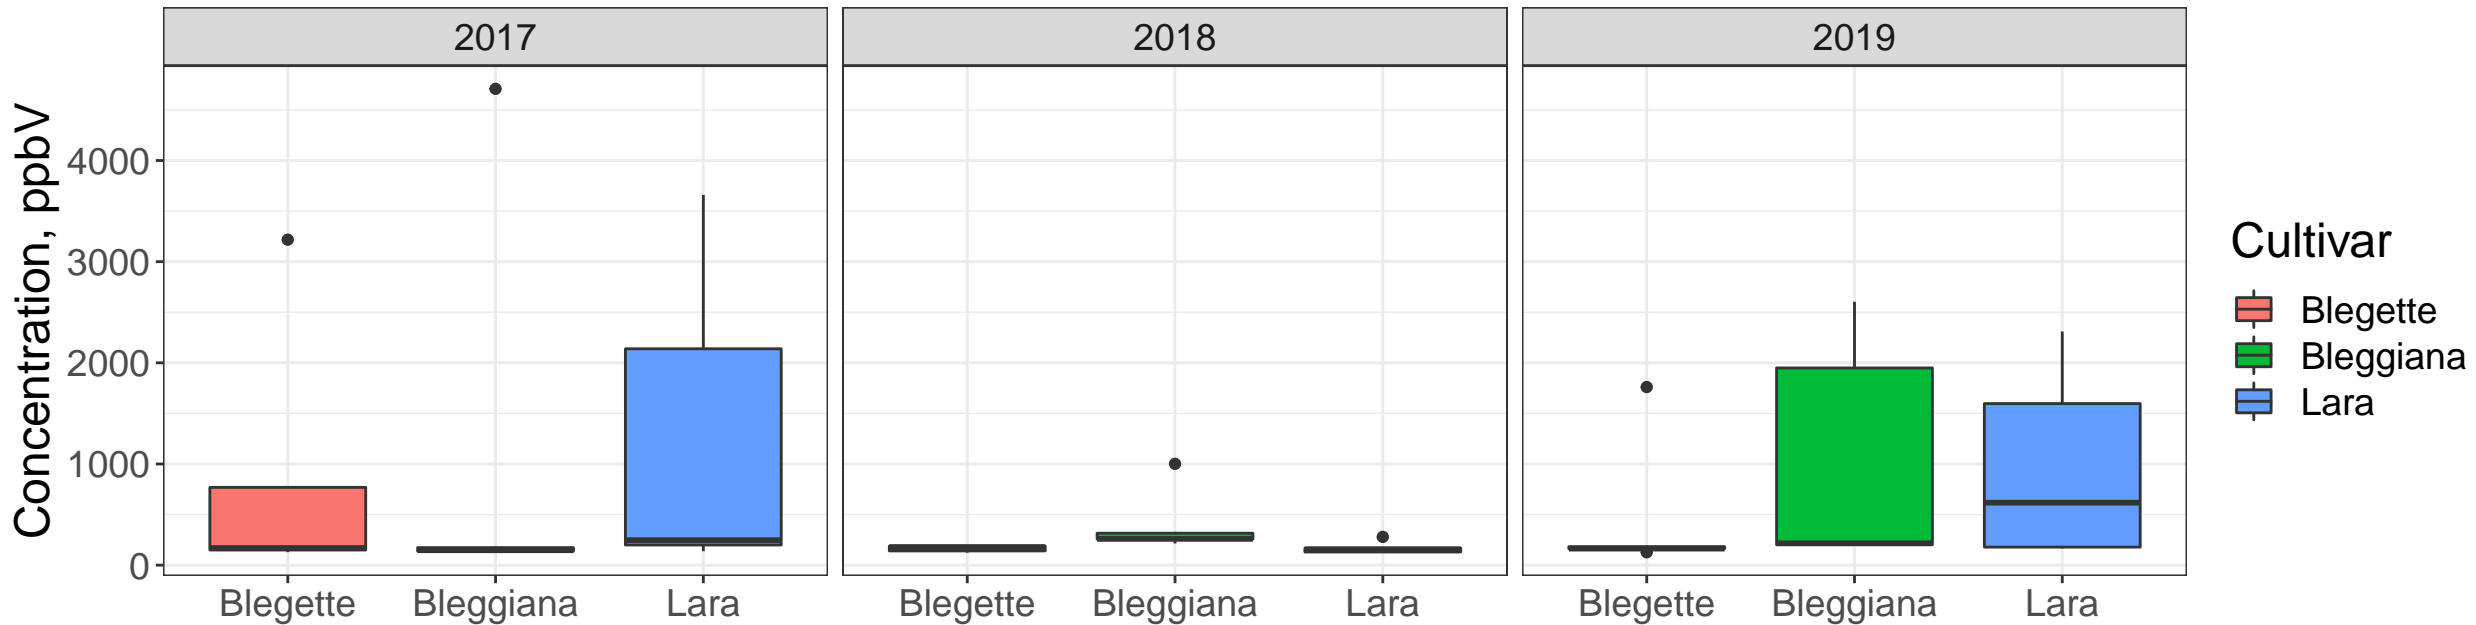

ms49.0118

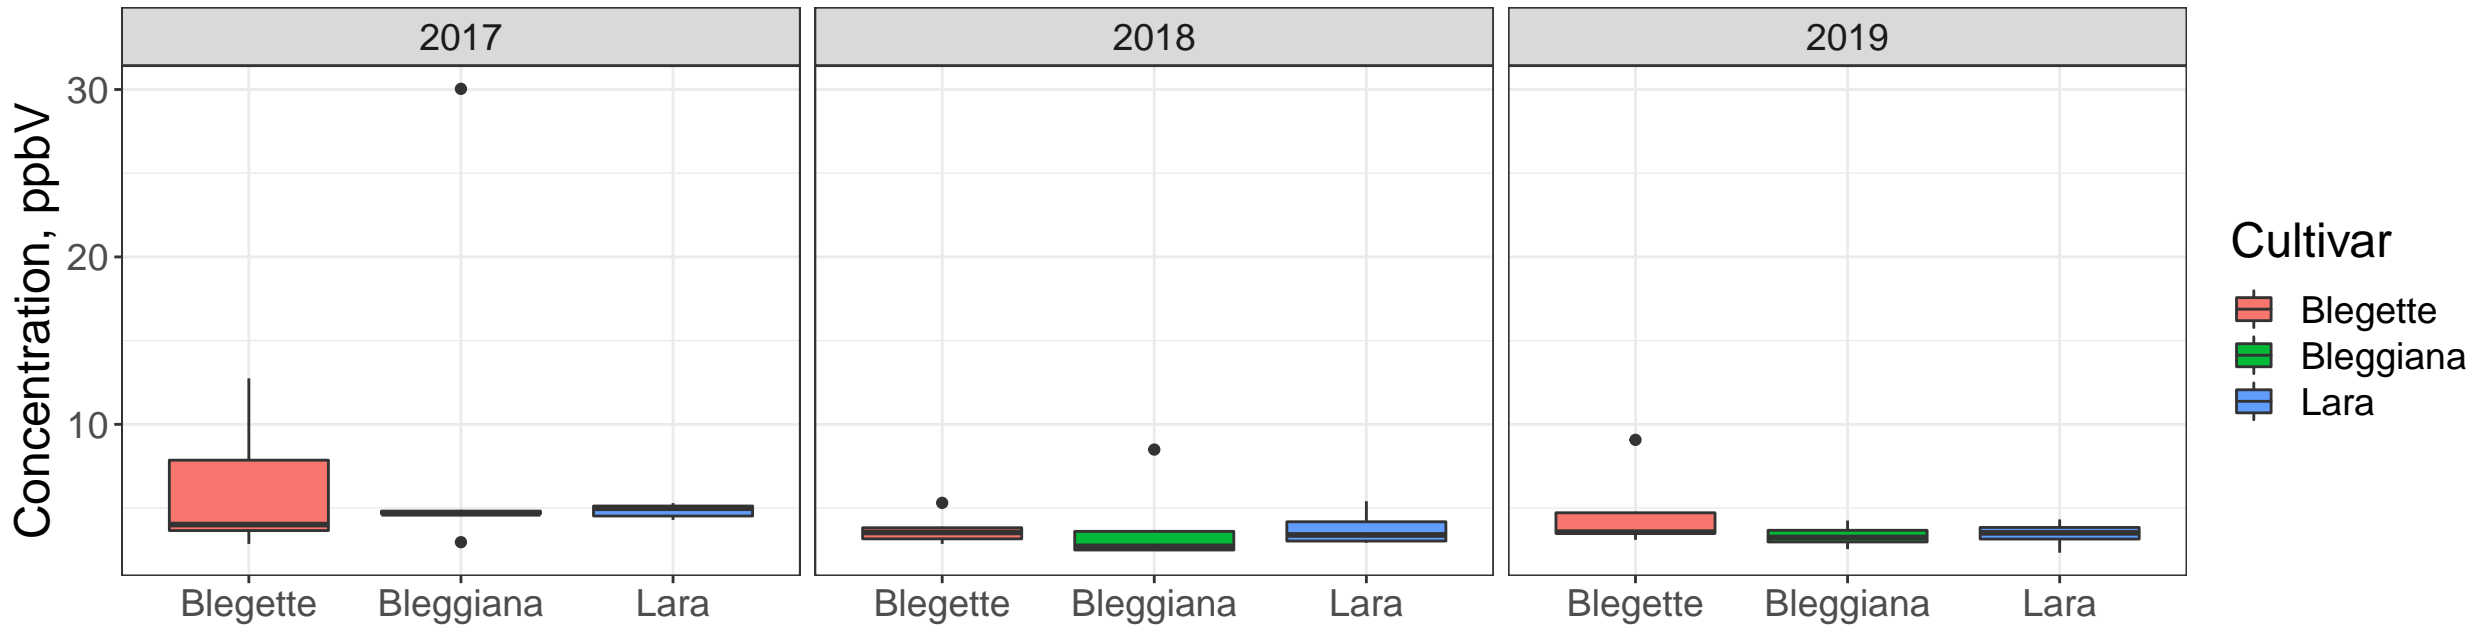

ms53.0035

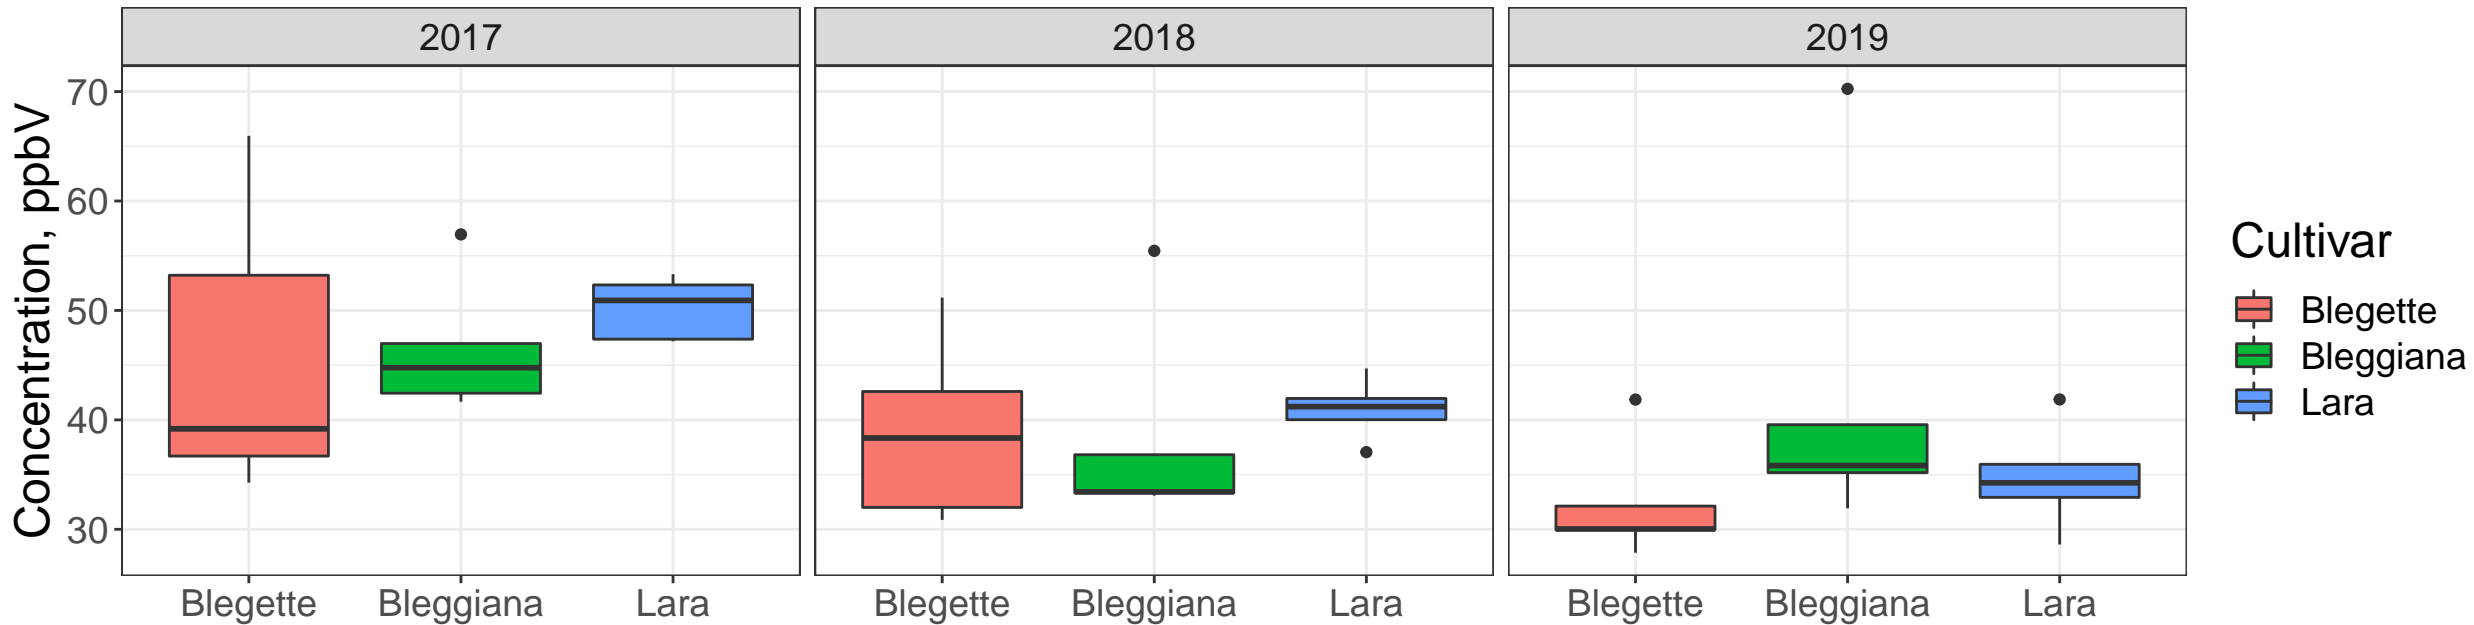

# ms53.0396

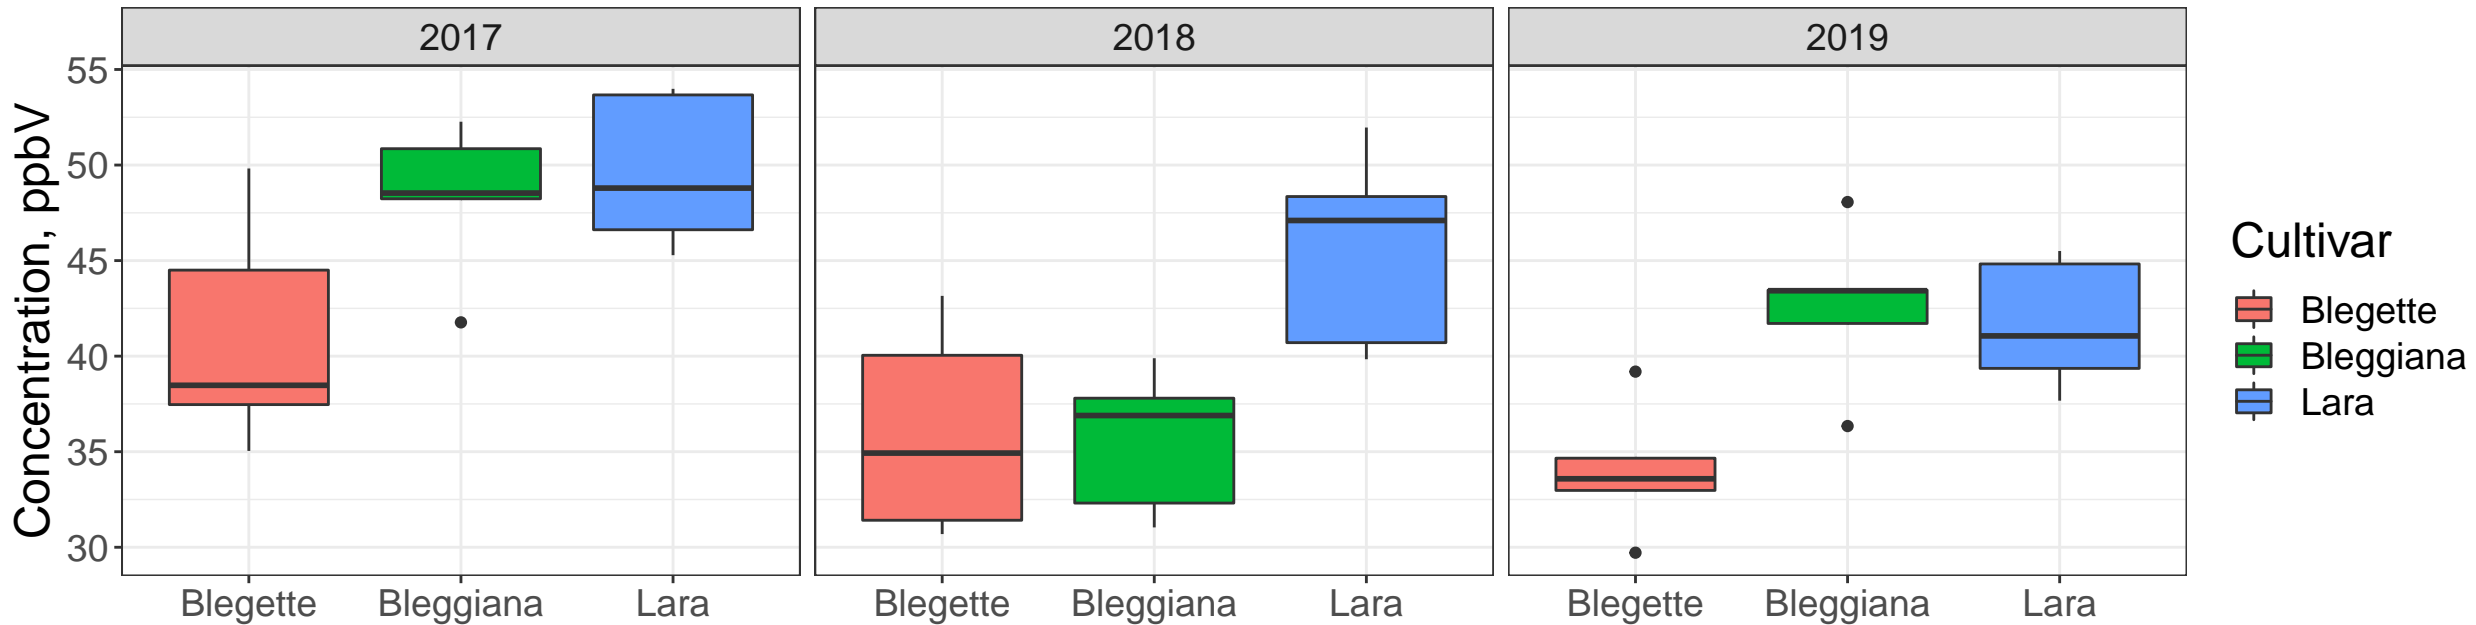

ms57.0363

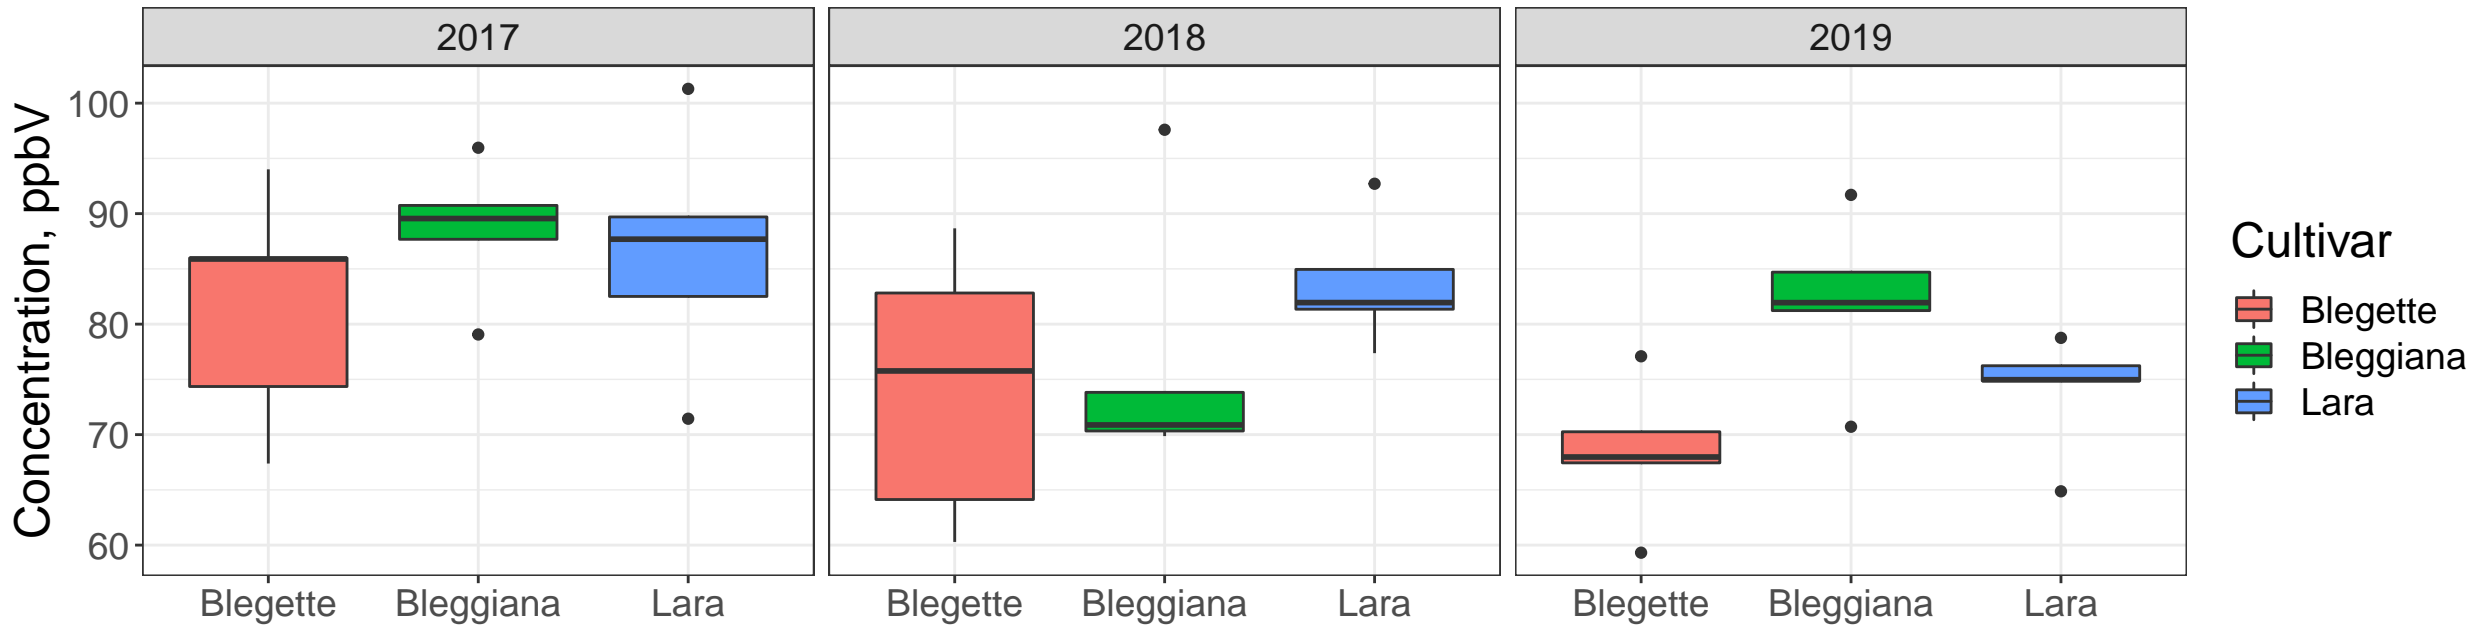



ms57.0707

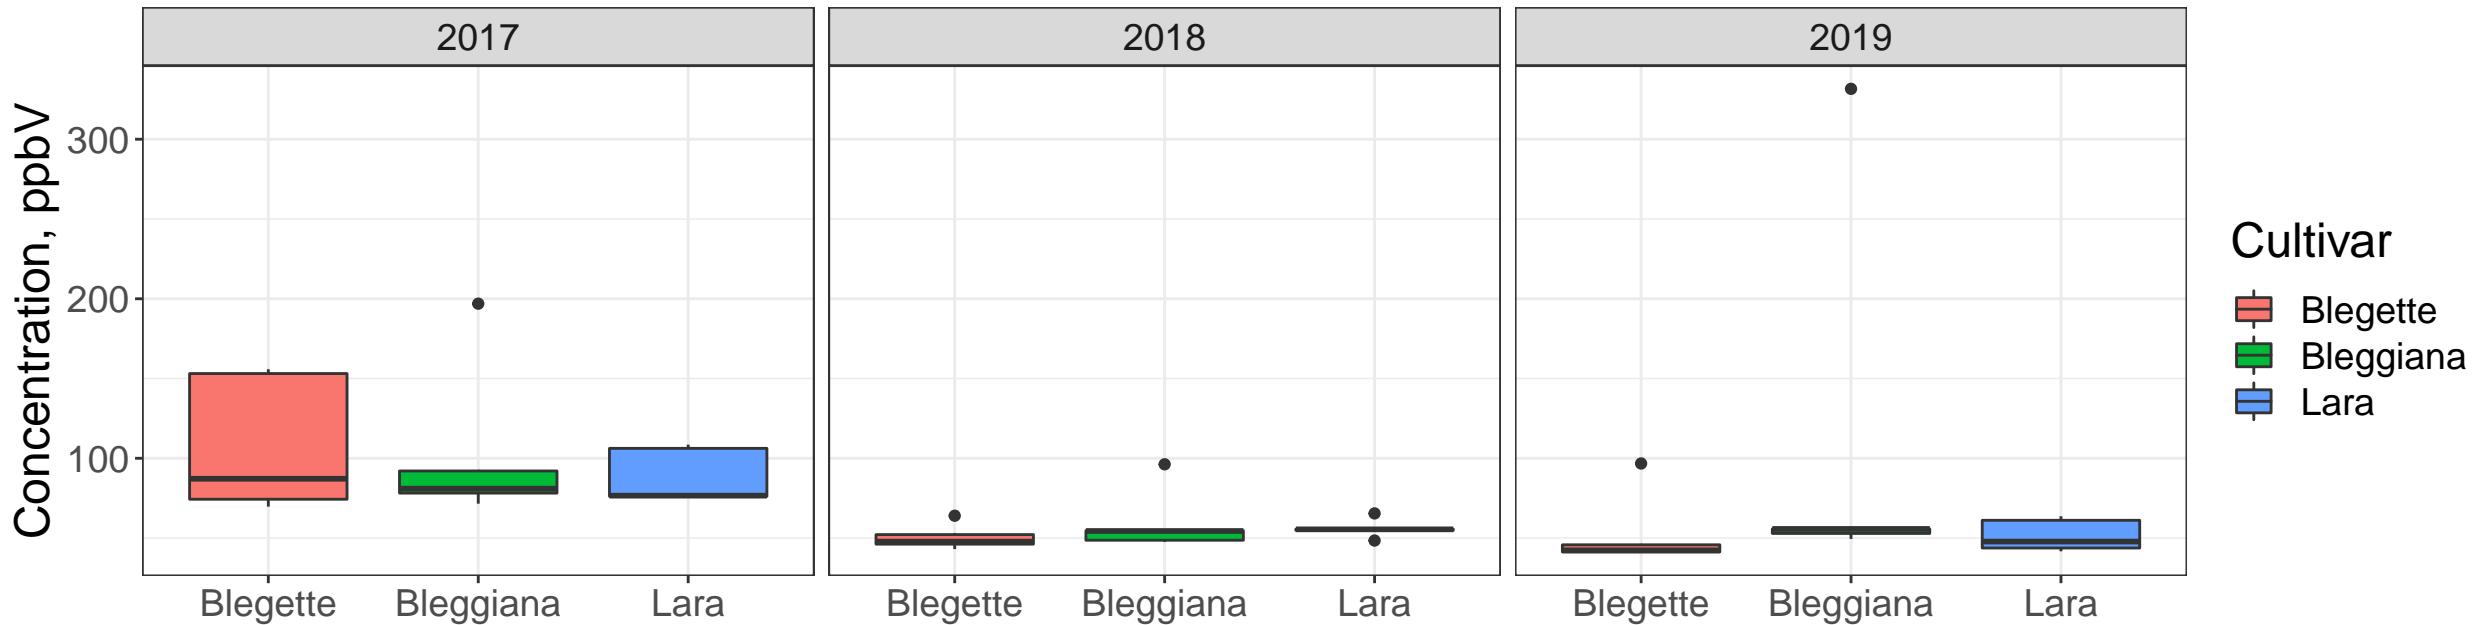

ms59.0489

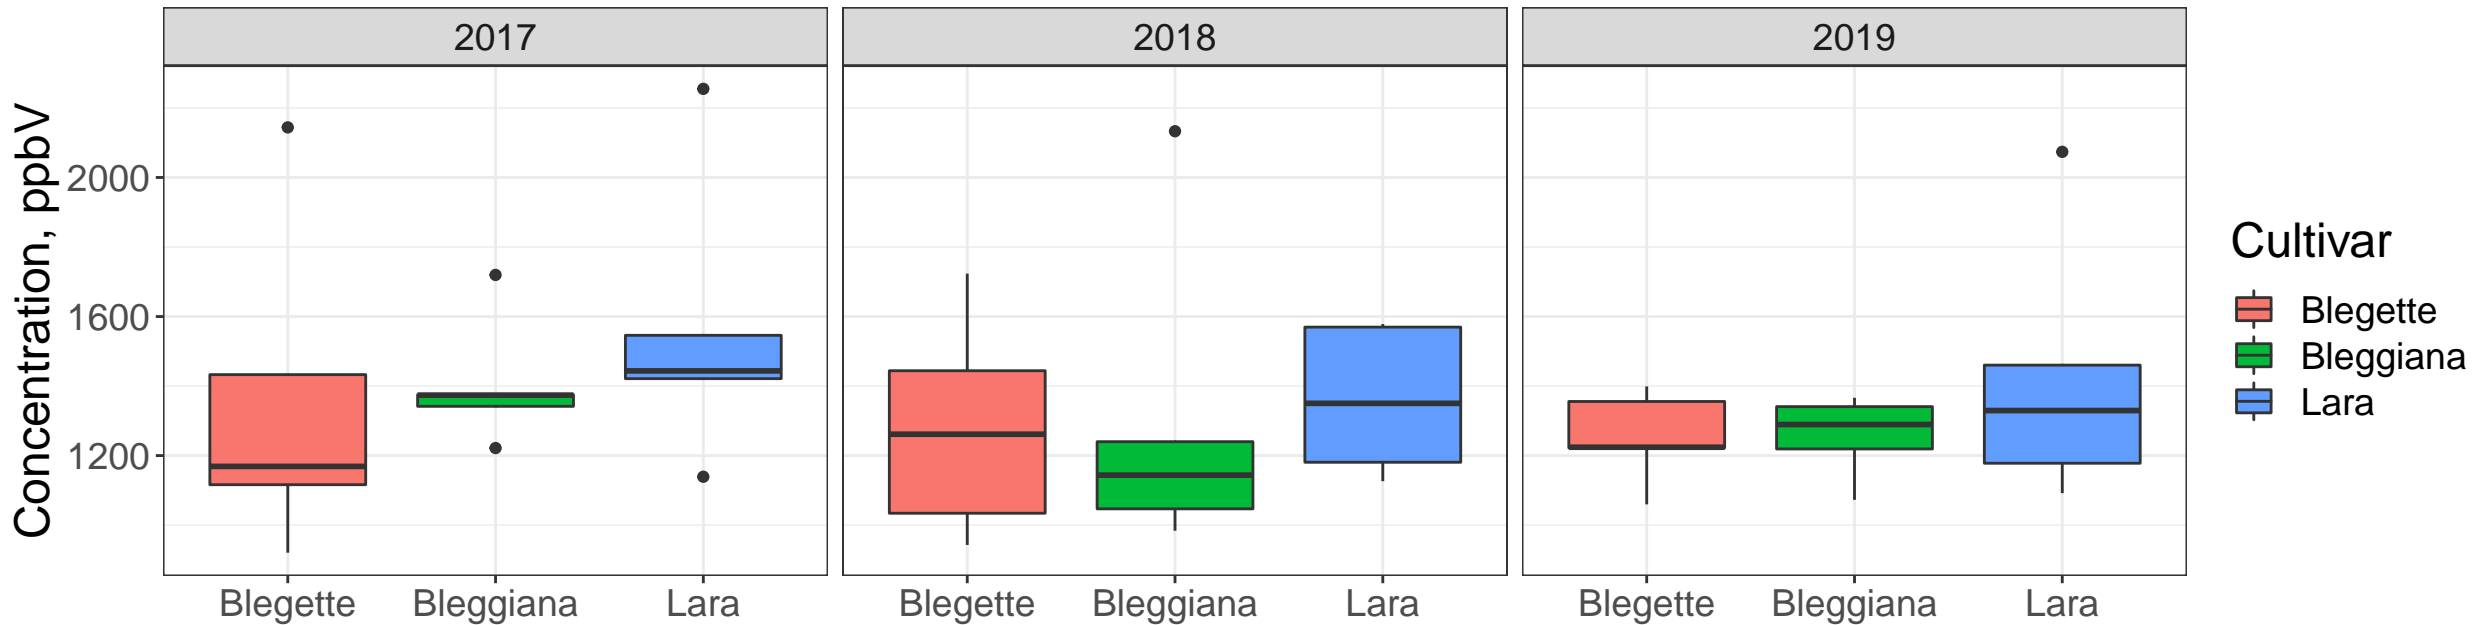

ms60.0231

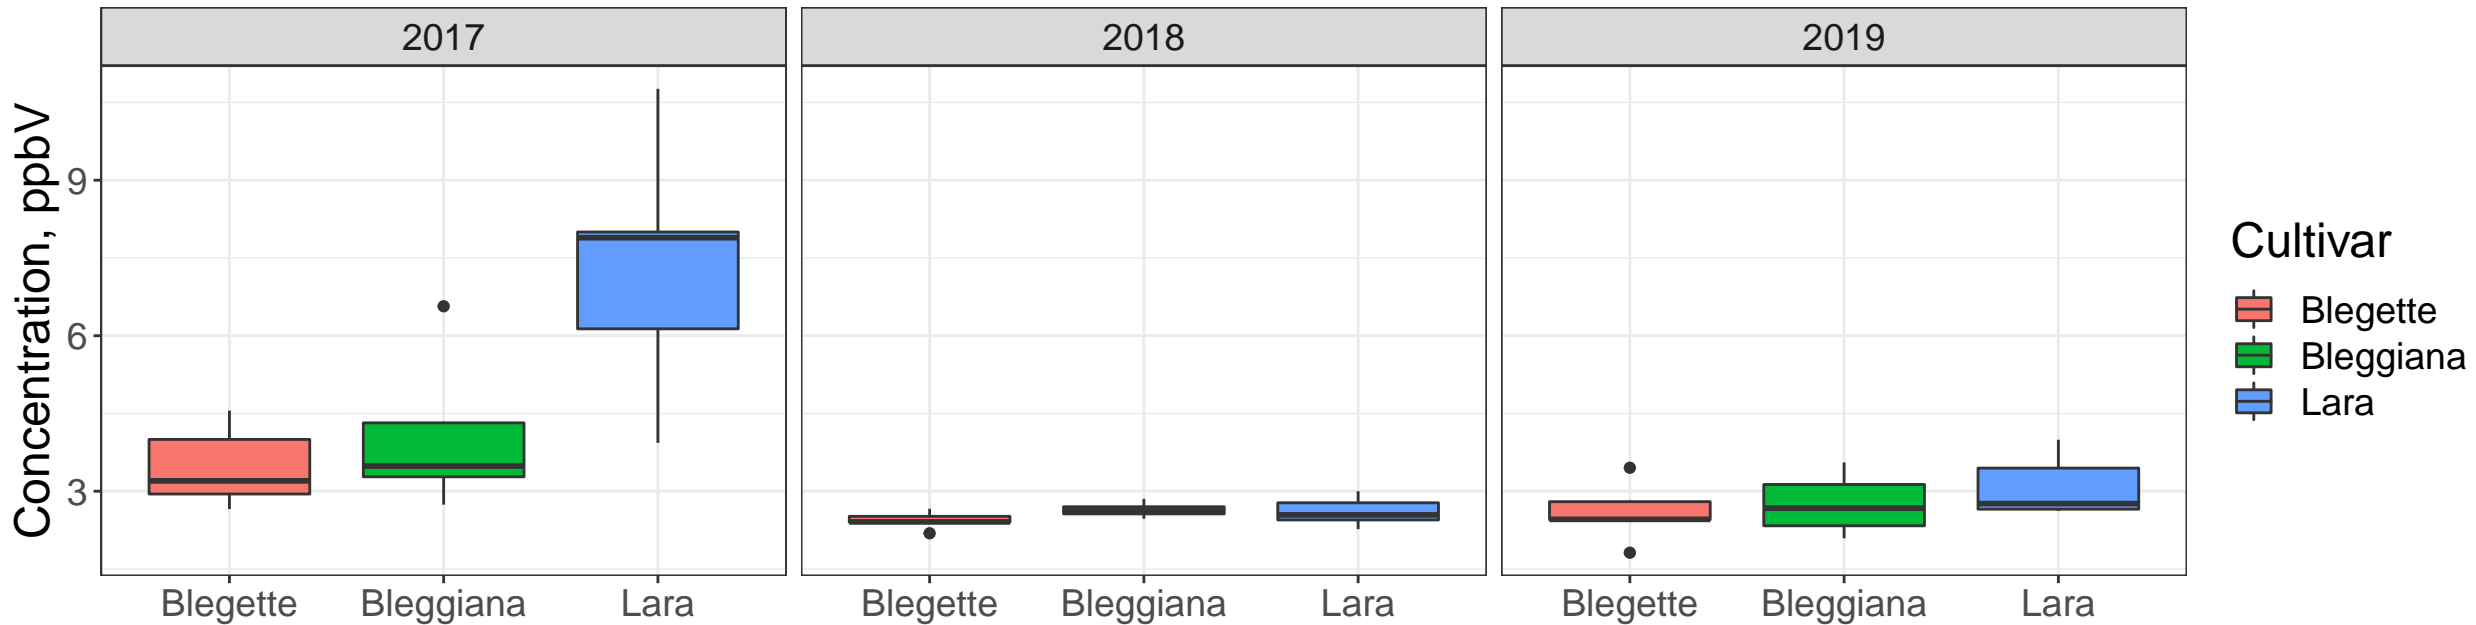

# ms61.0281

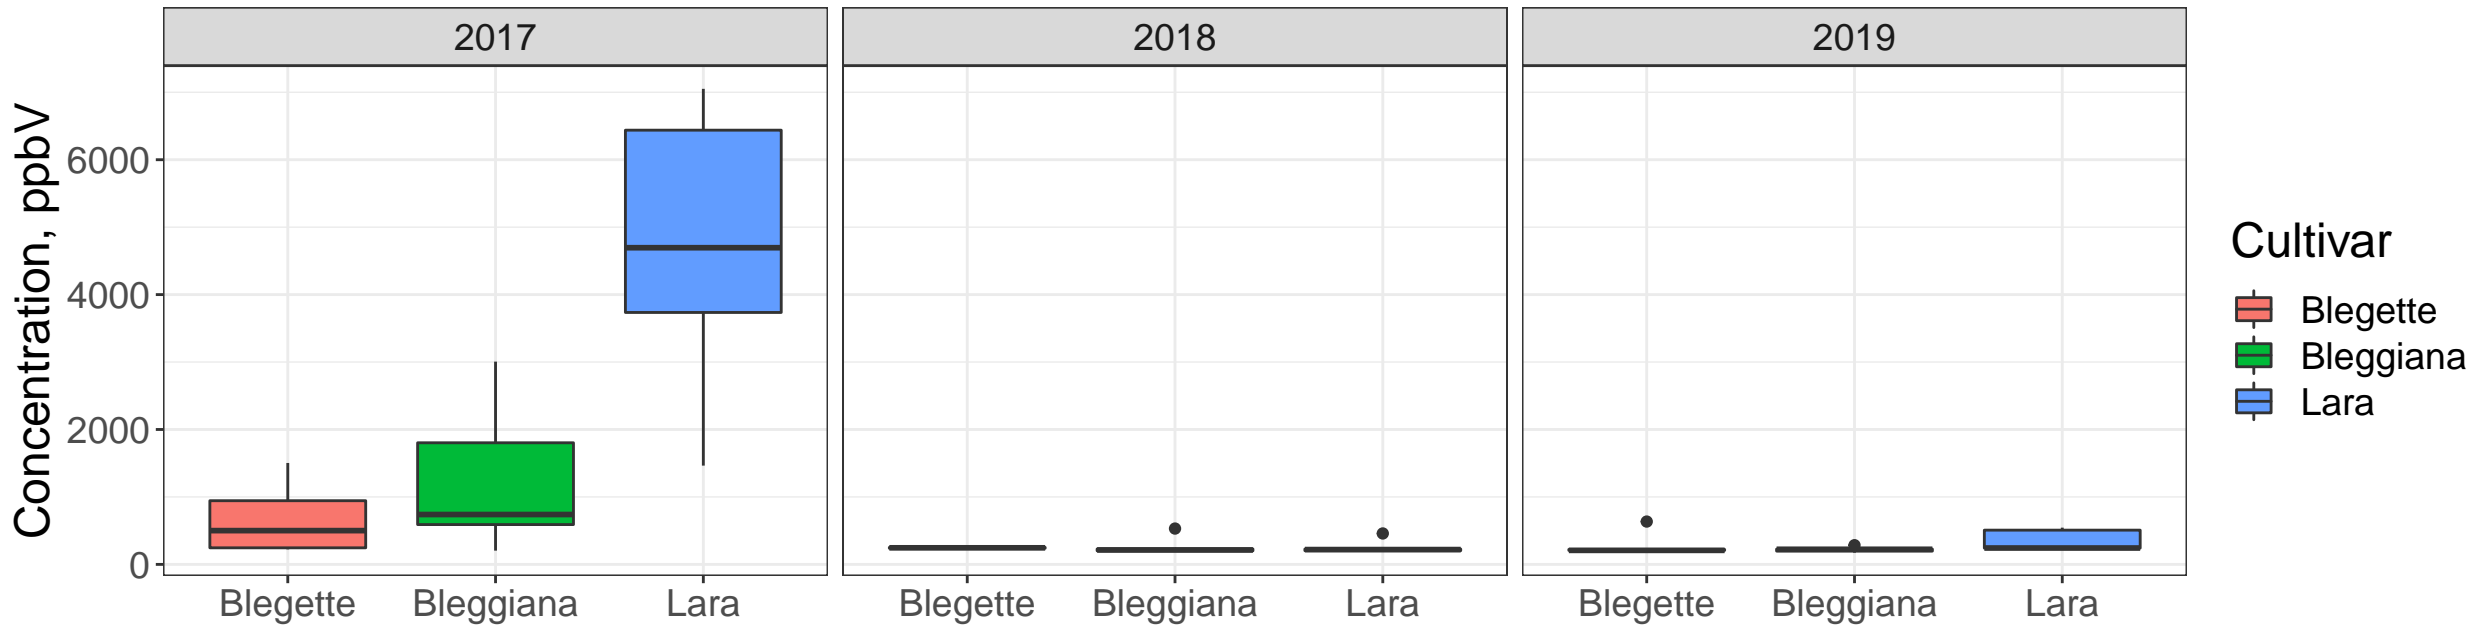

ms63.0164

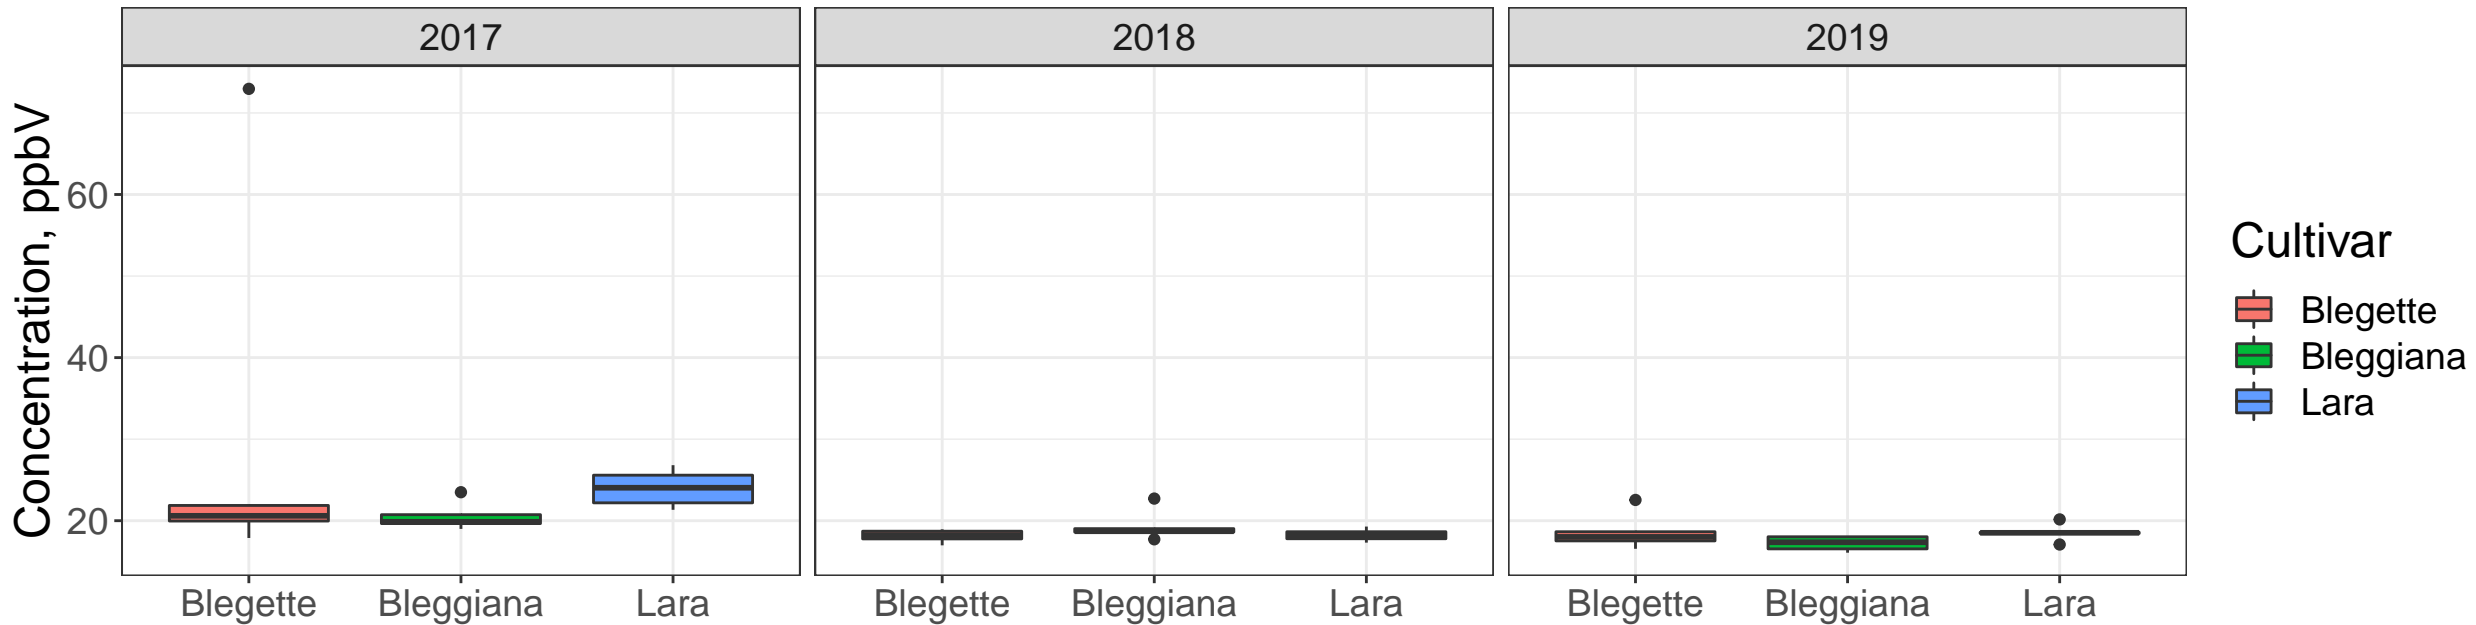

ms67.0565

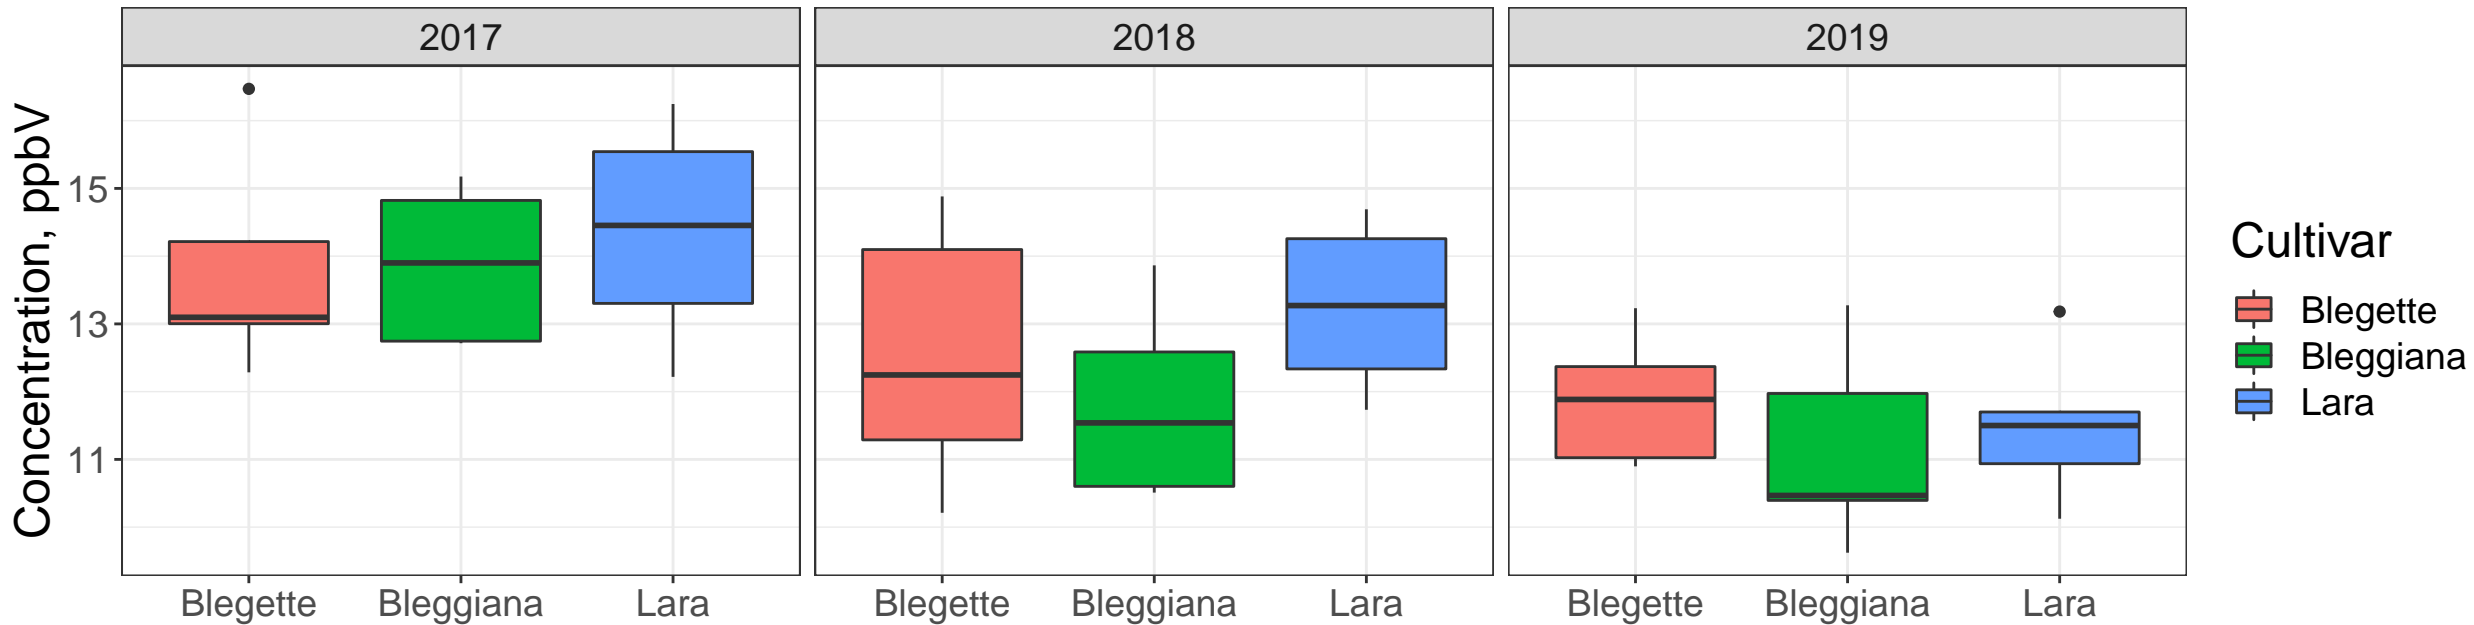

# ms69.0356

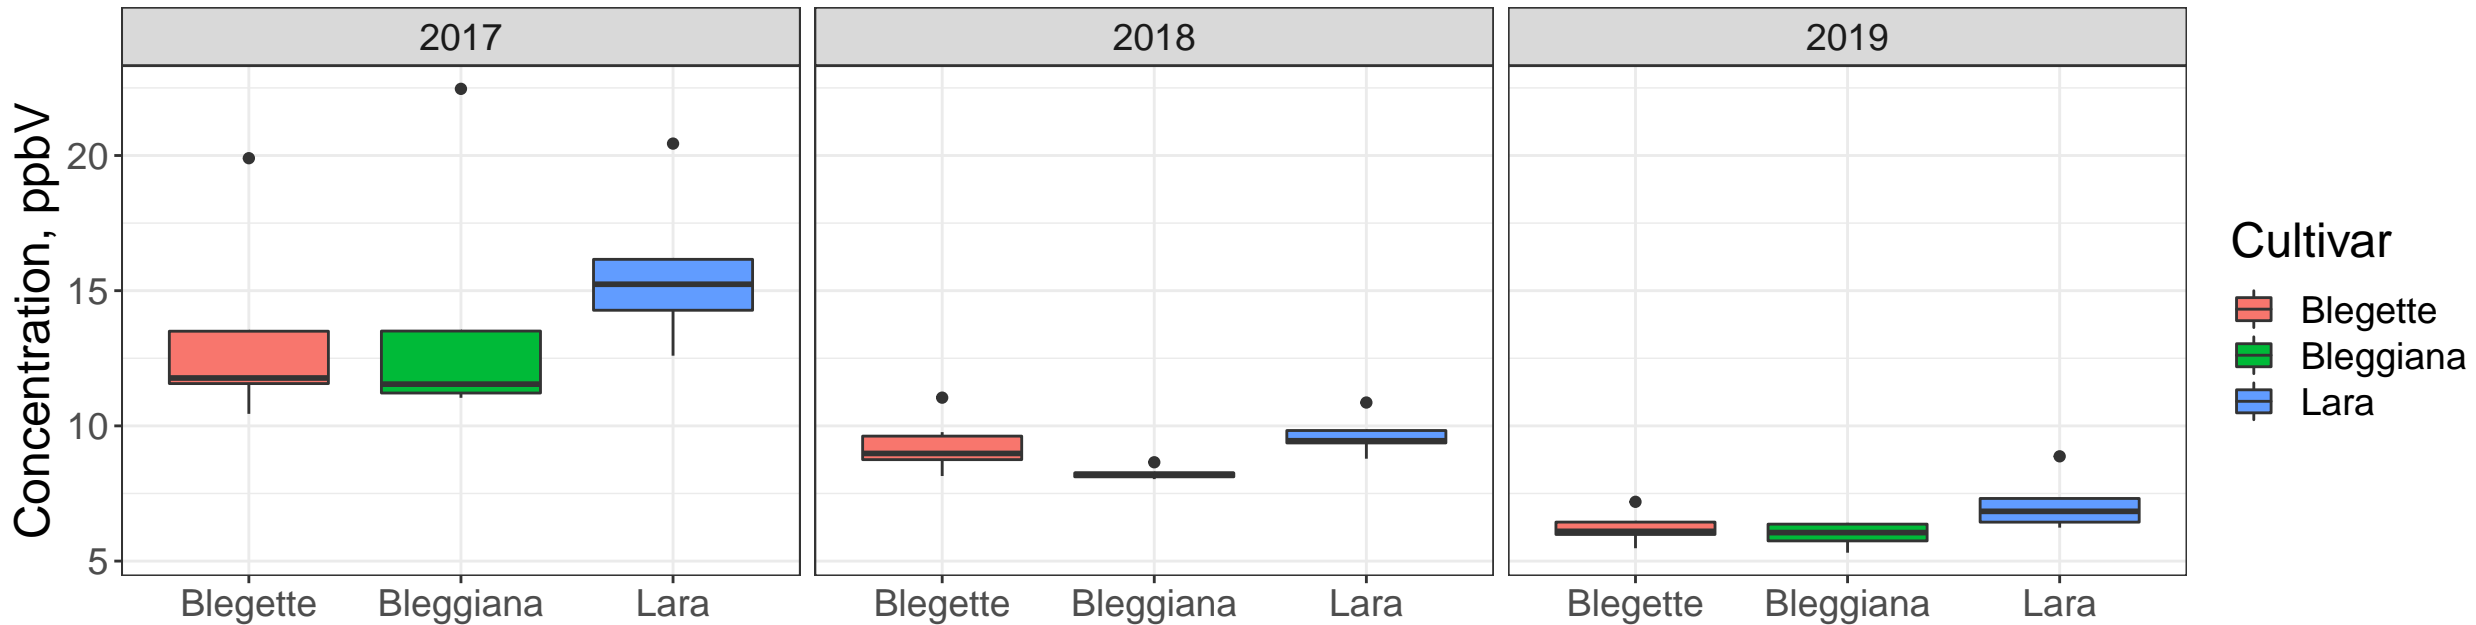

ms69.0707

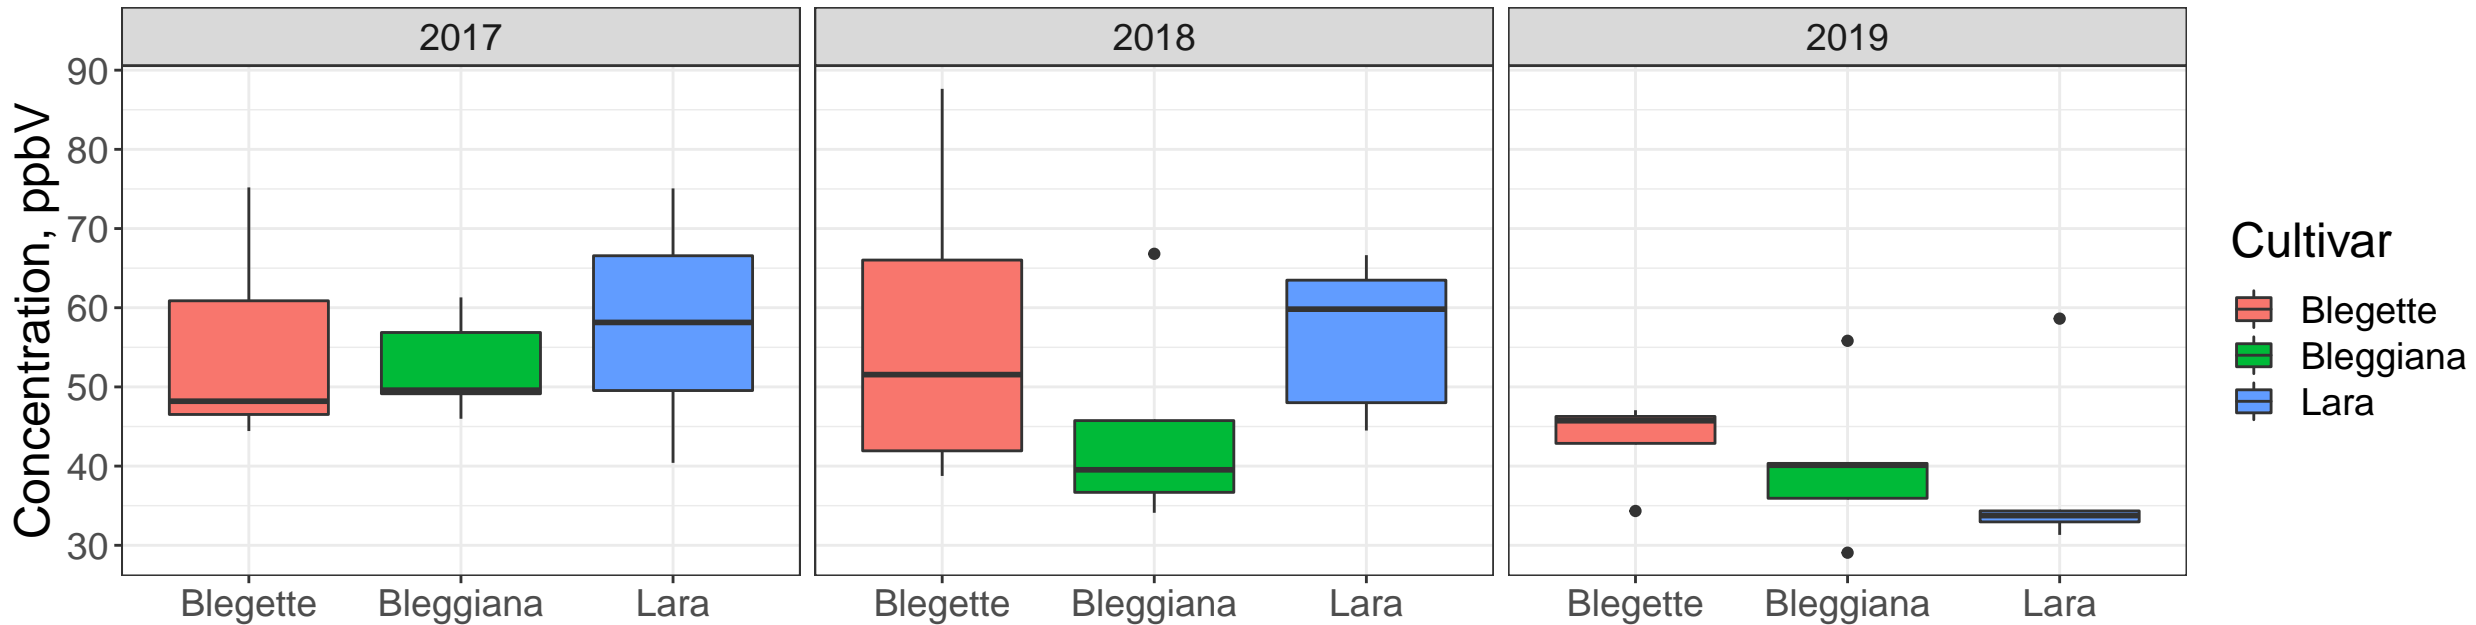



ms71.0499

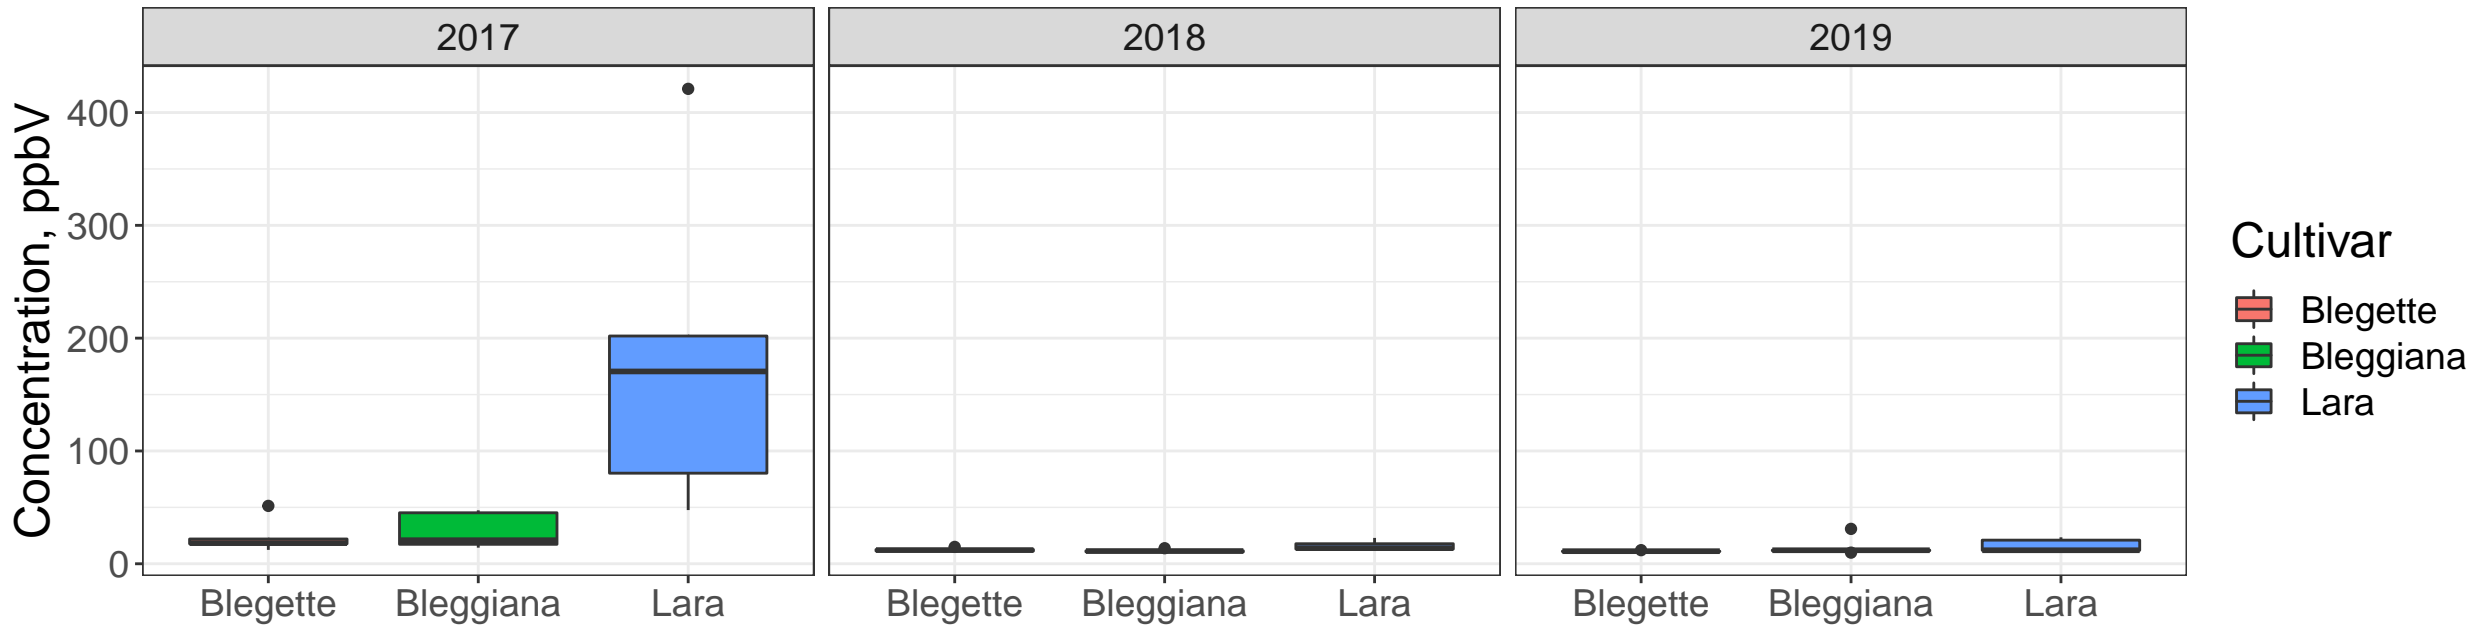

ms71.0863

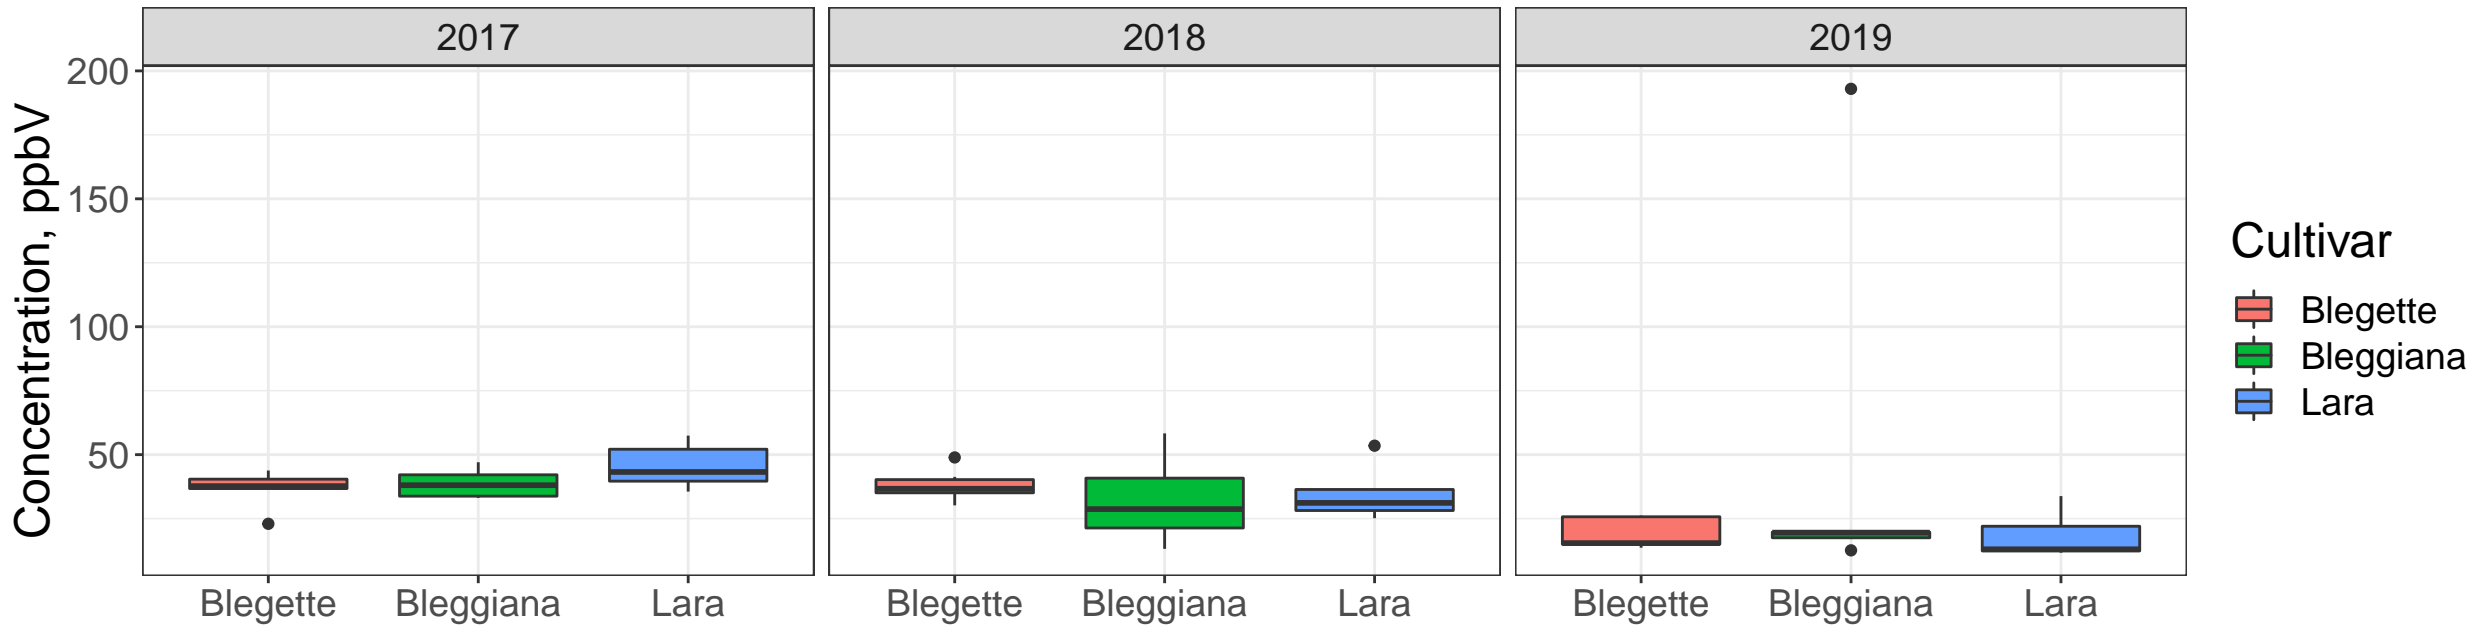

ms73.0646

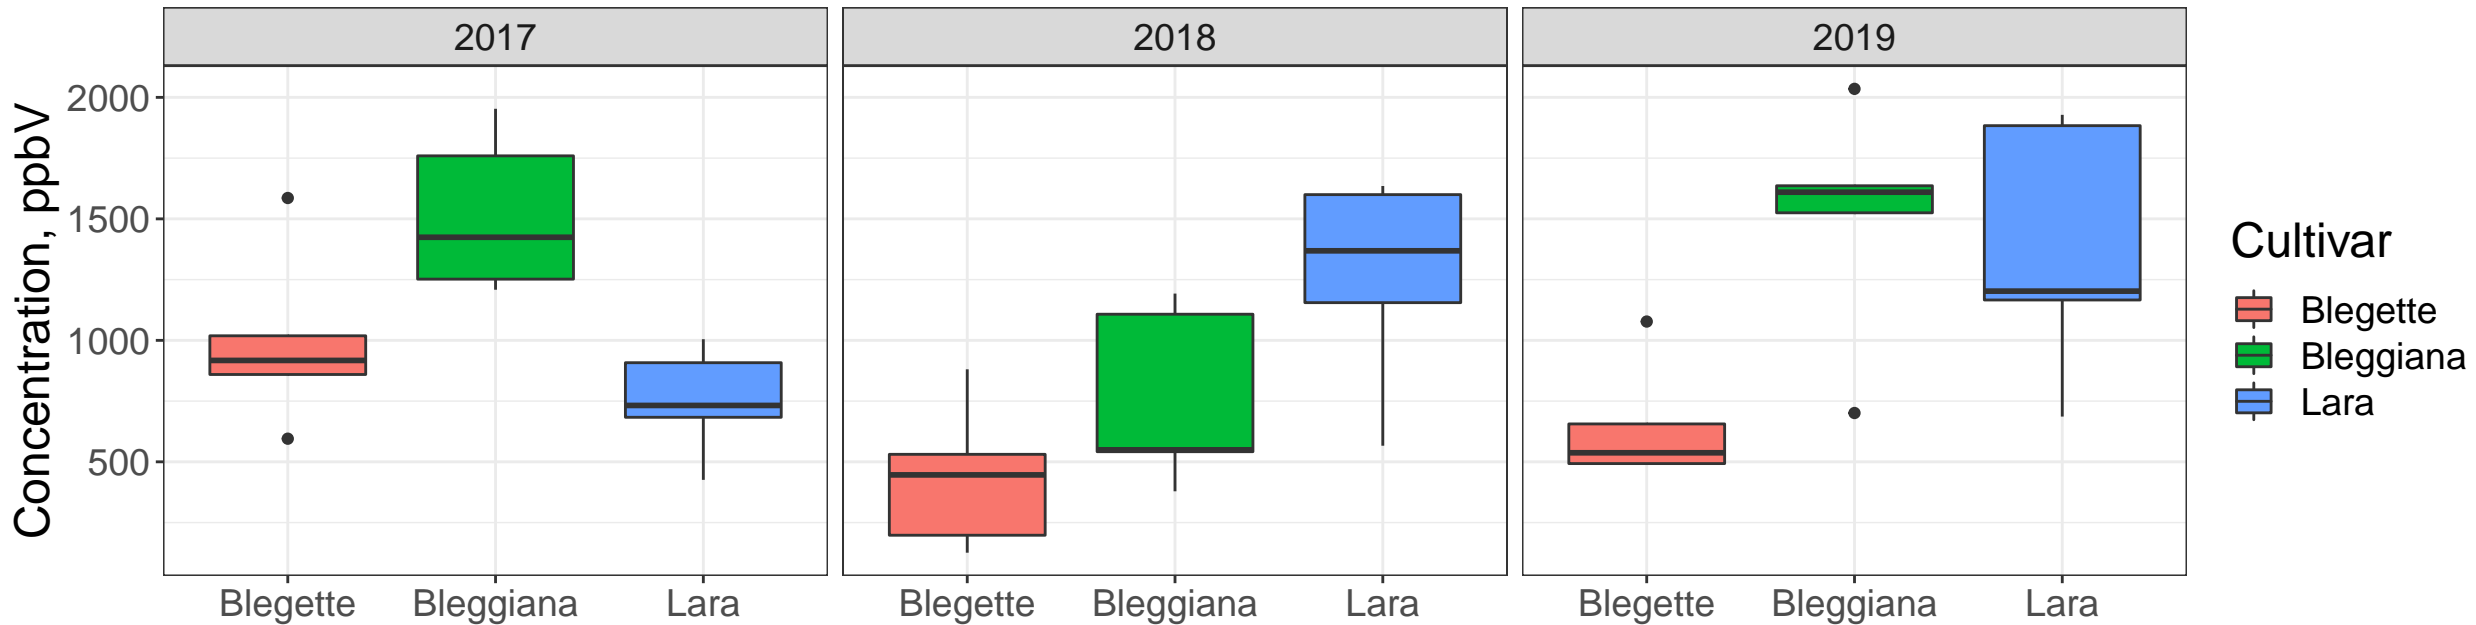

# ms75.0433

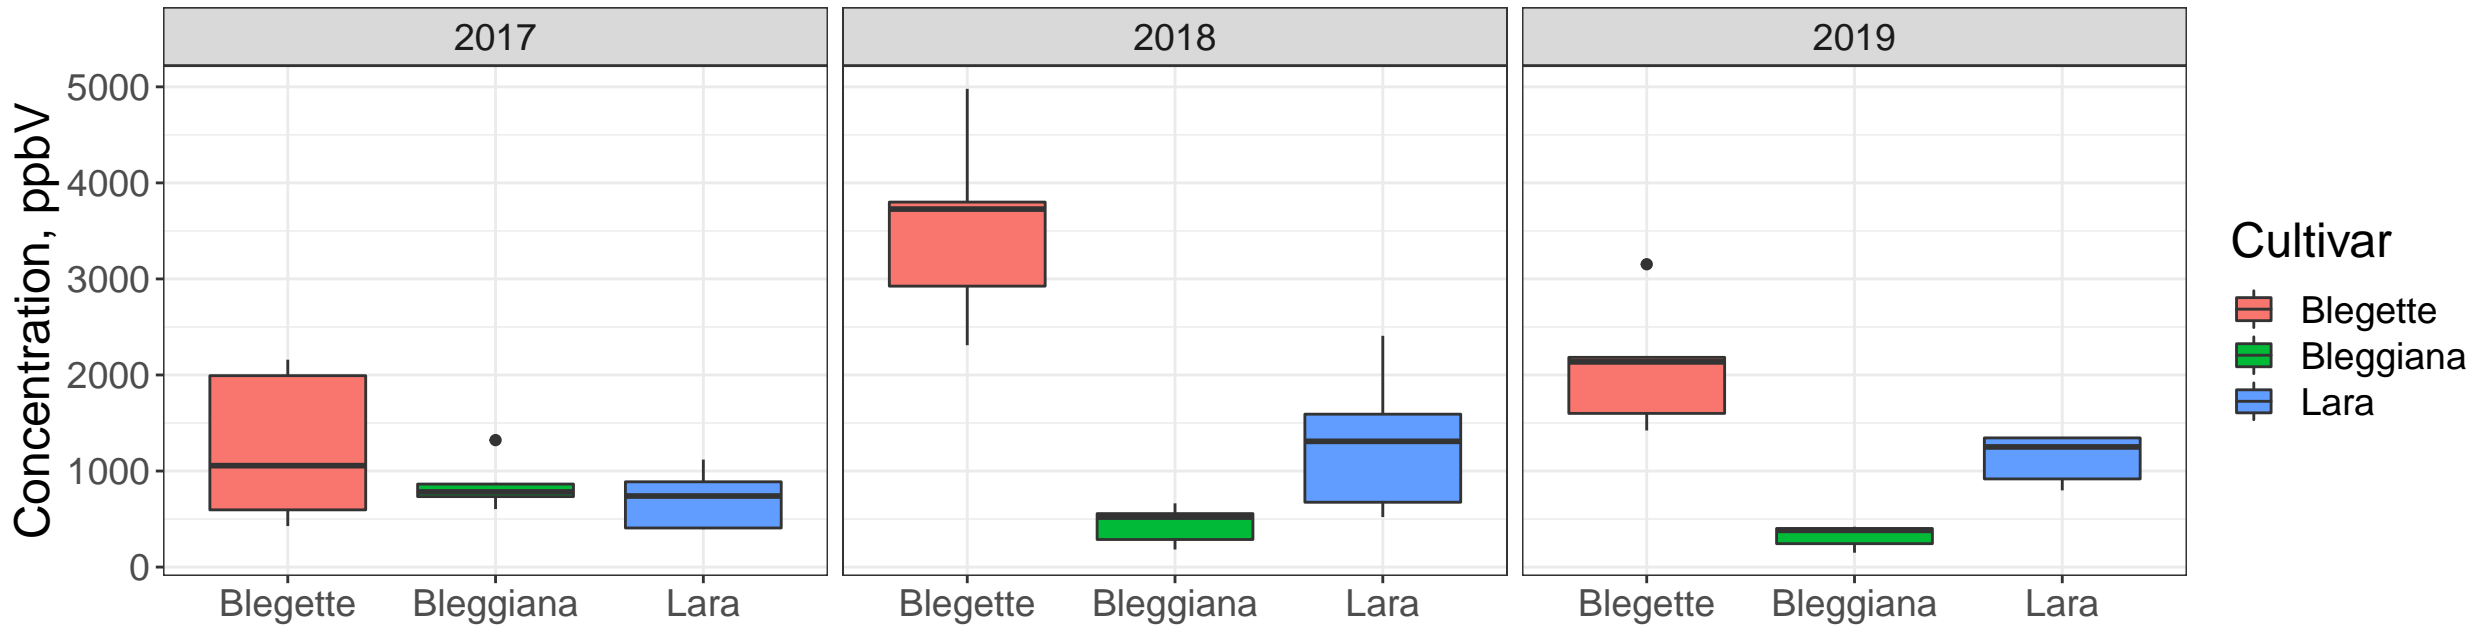

ms77.0291

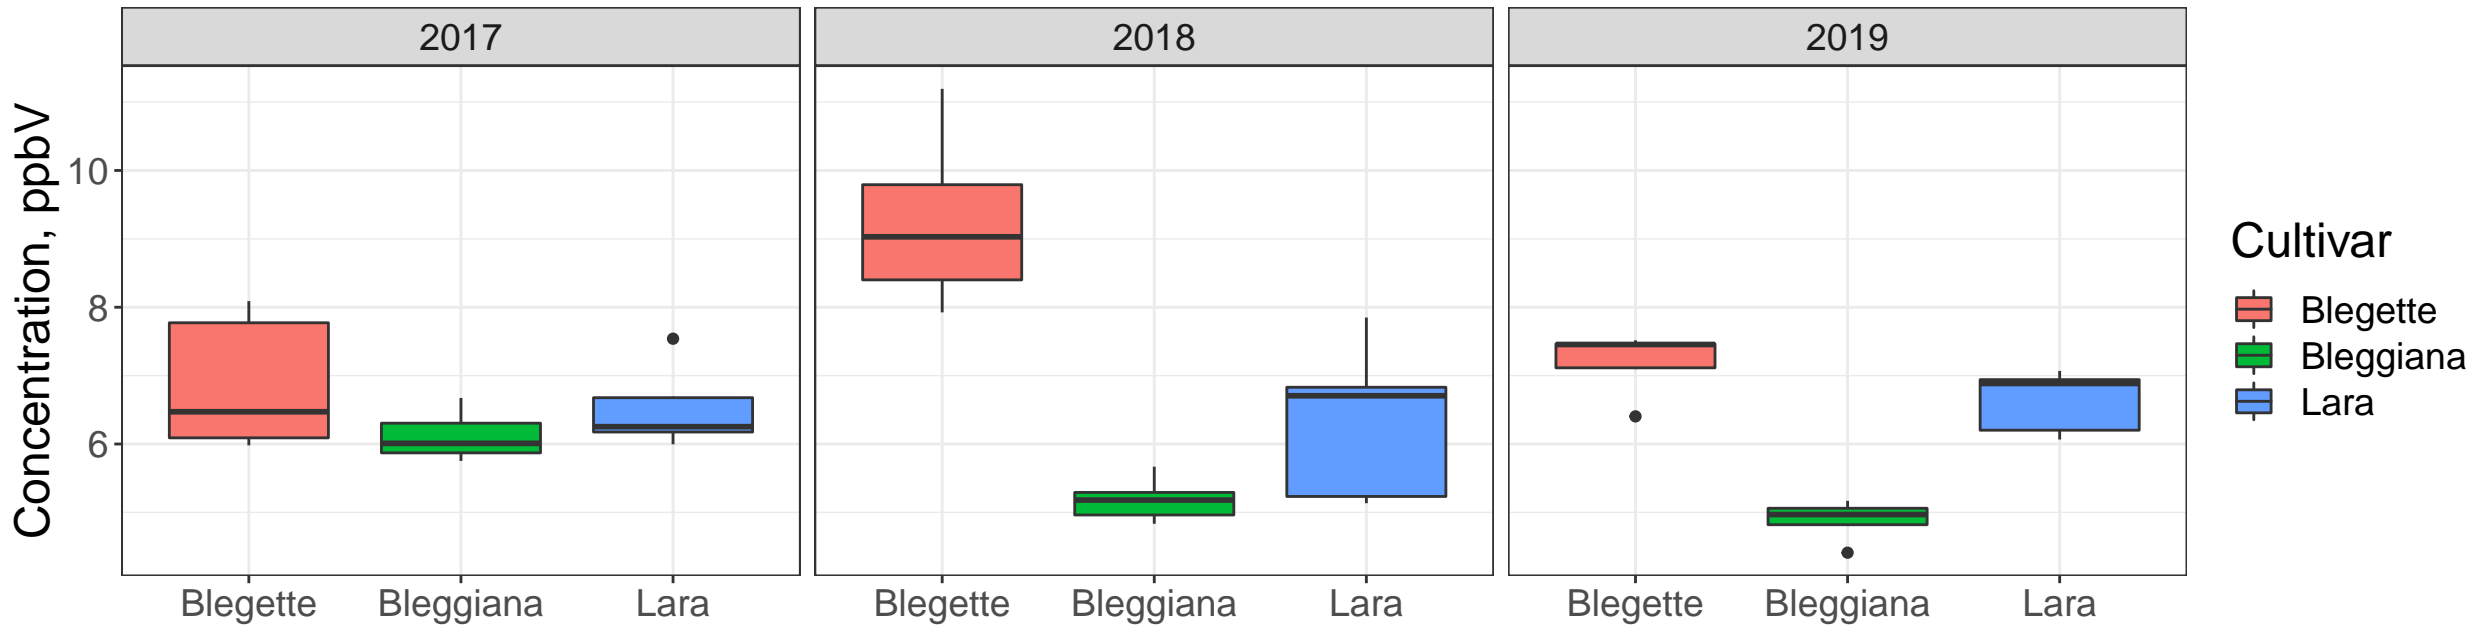

ms78.9696

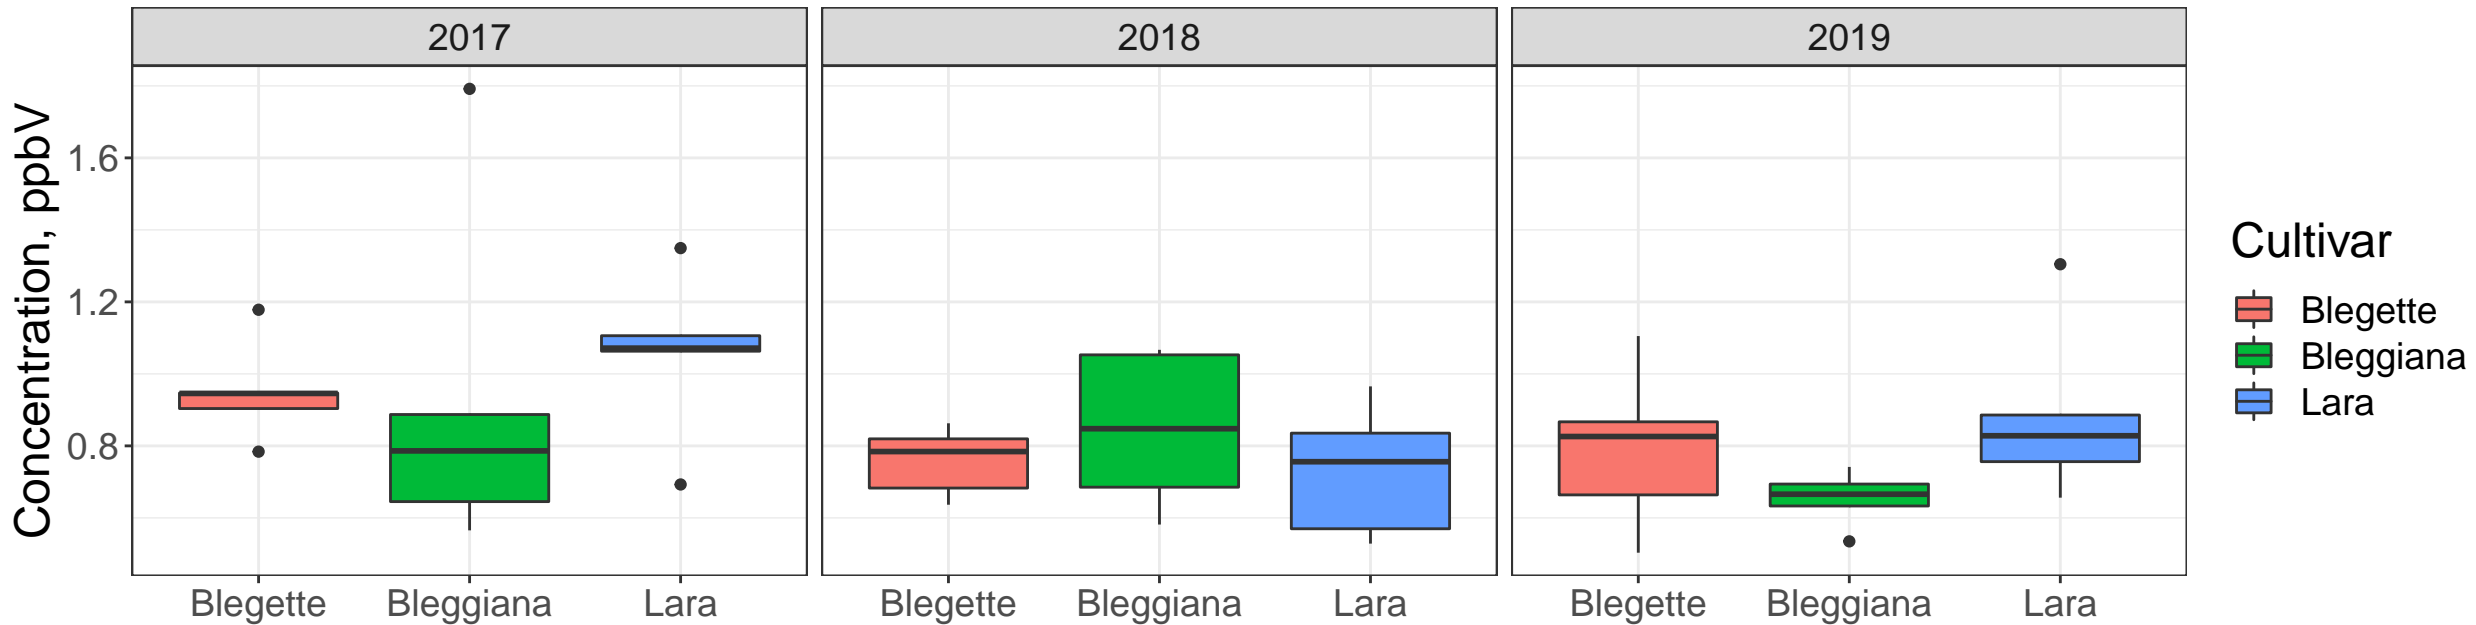

ms79.0733

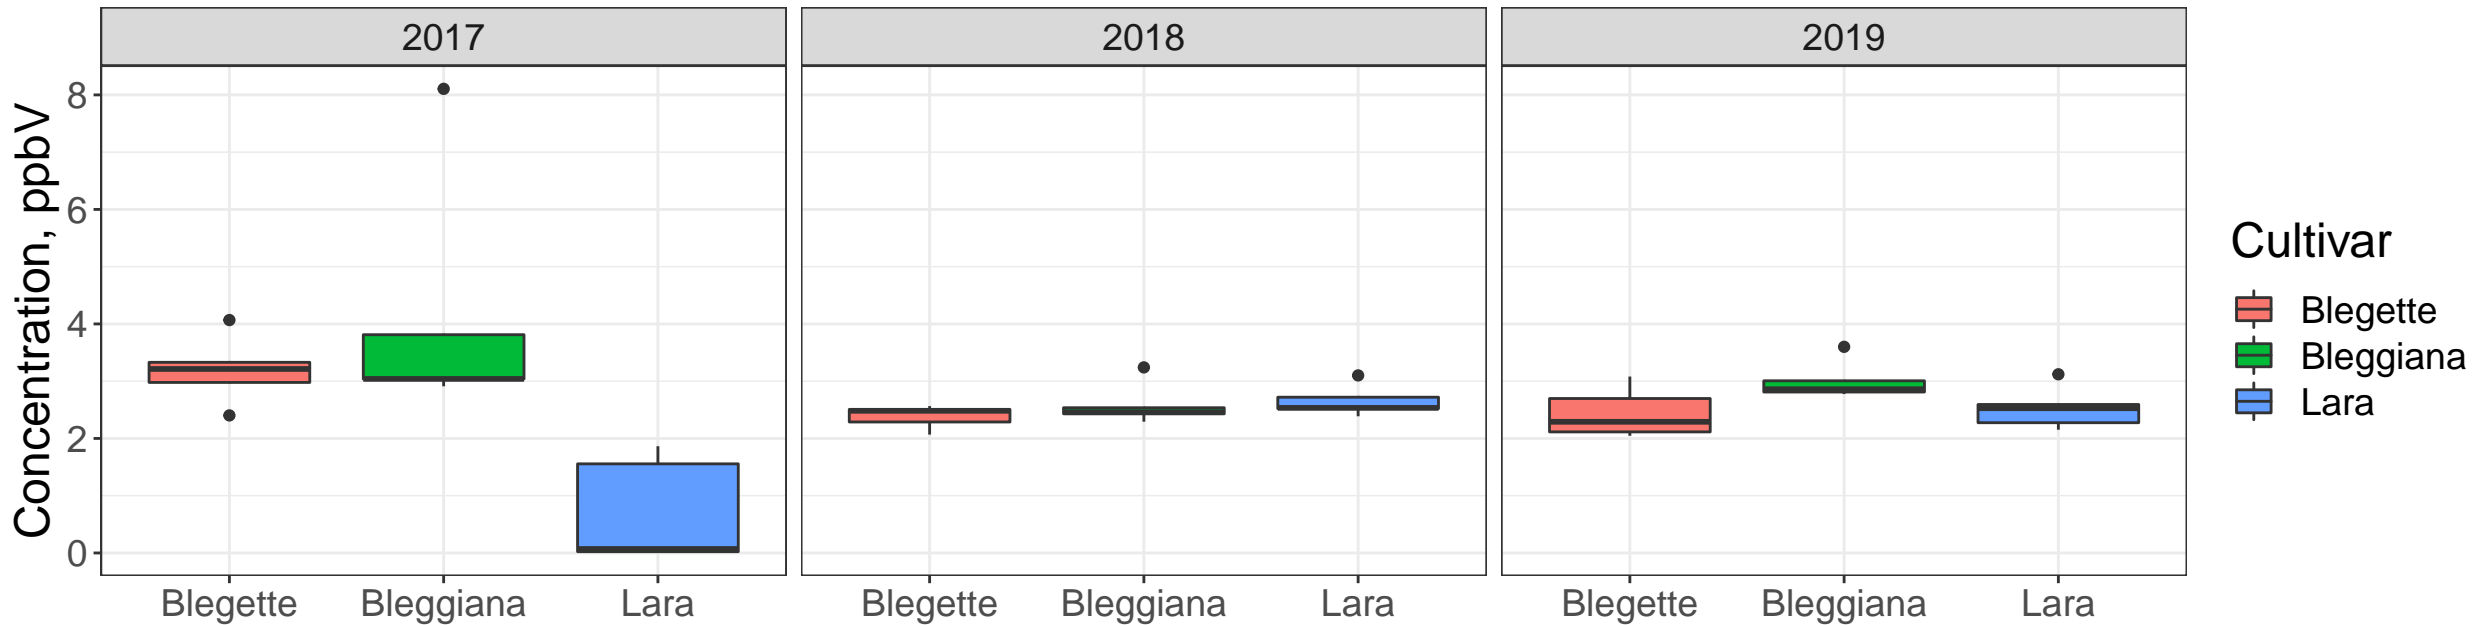

ms80.9933

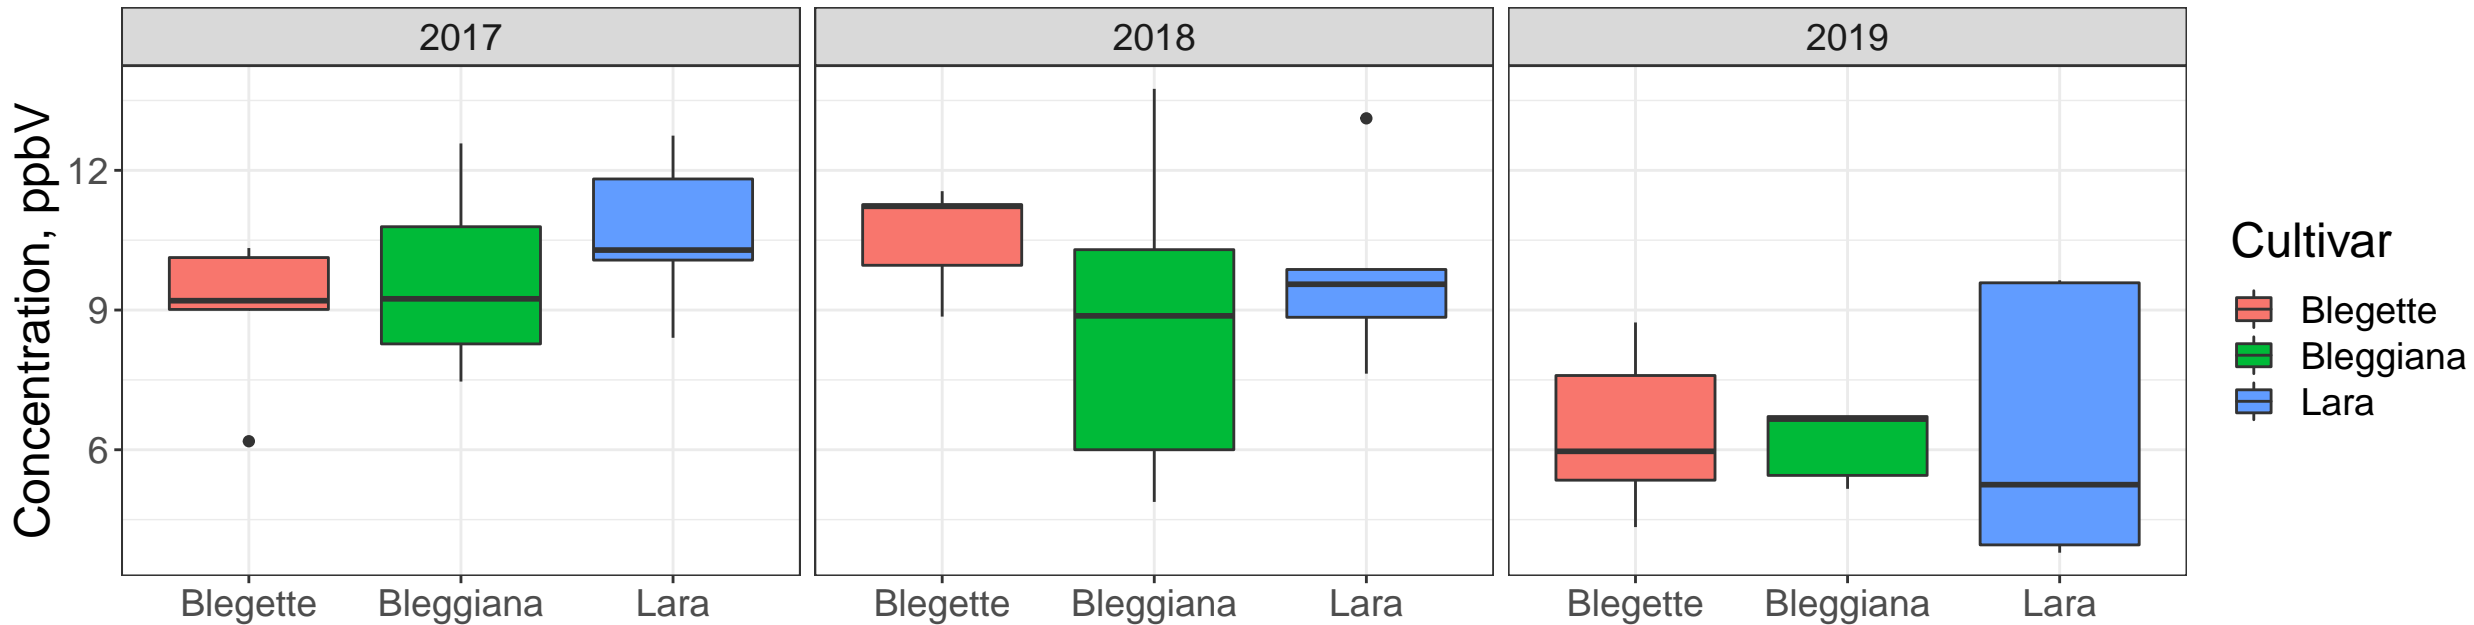



ms82.9449

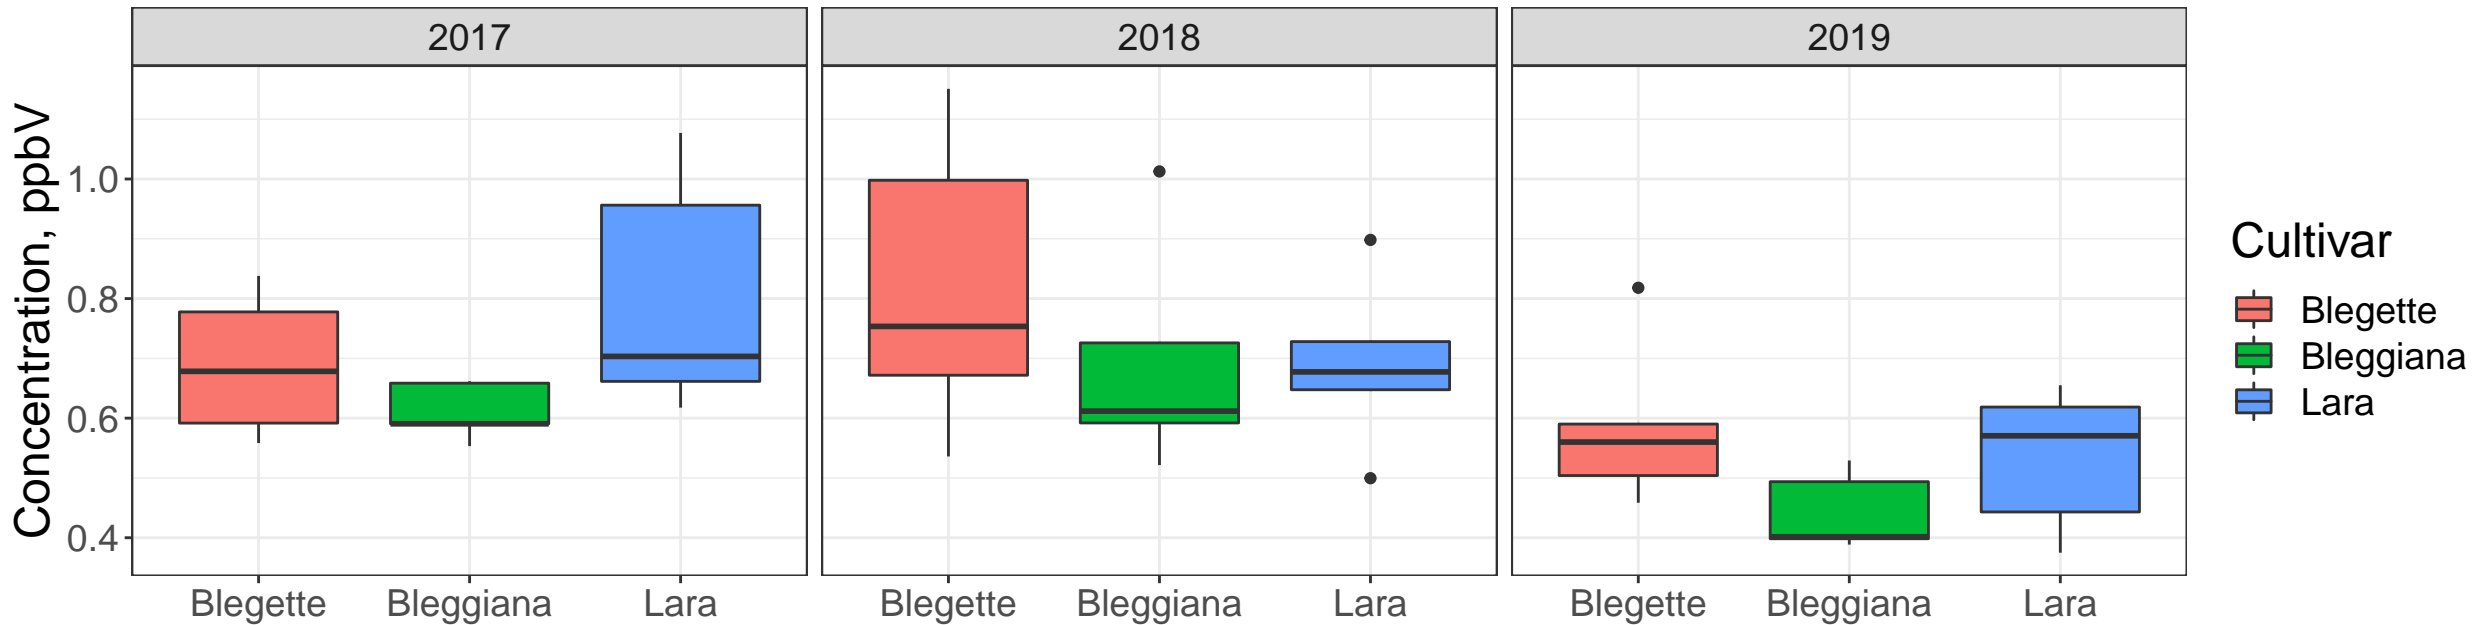

# ms83.0519

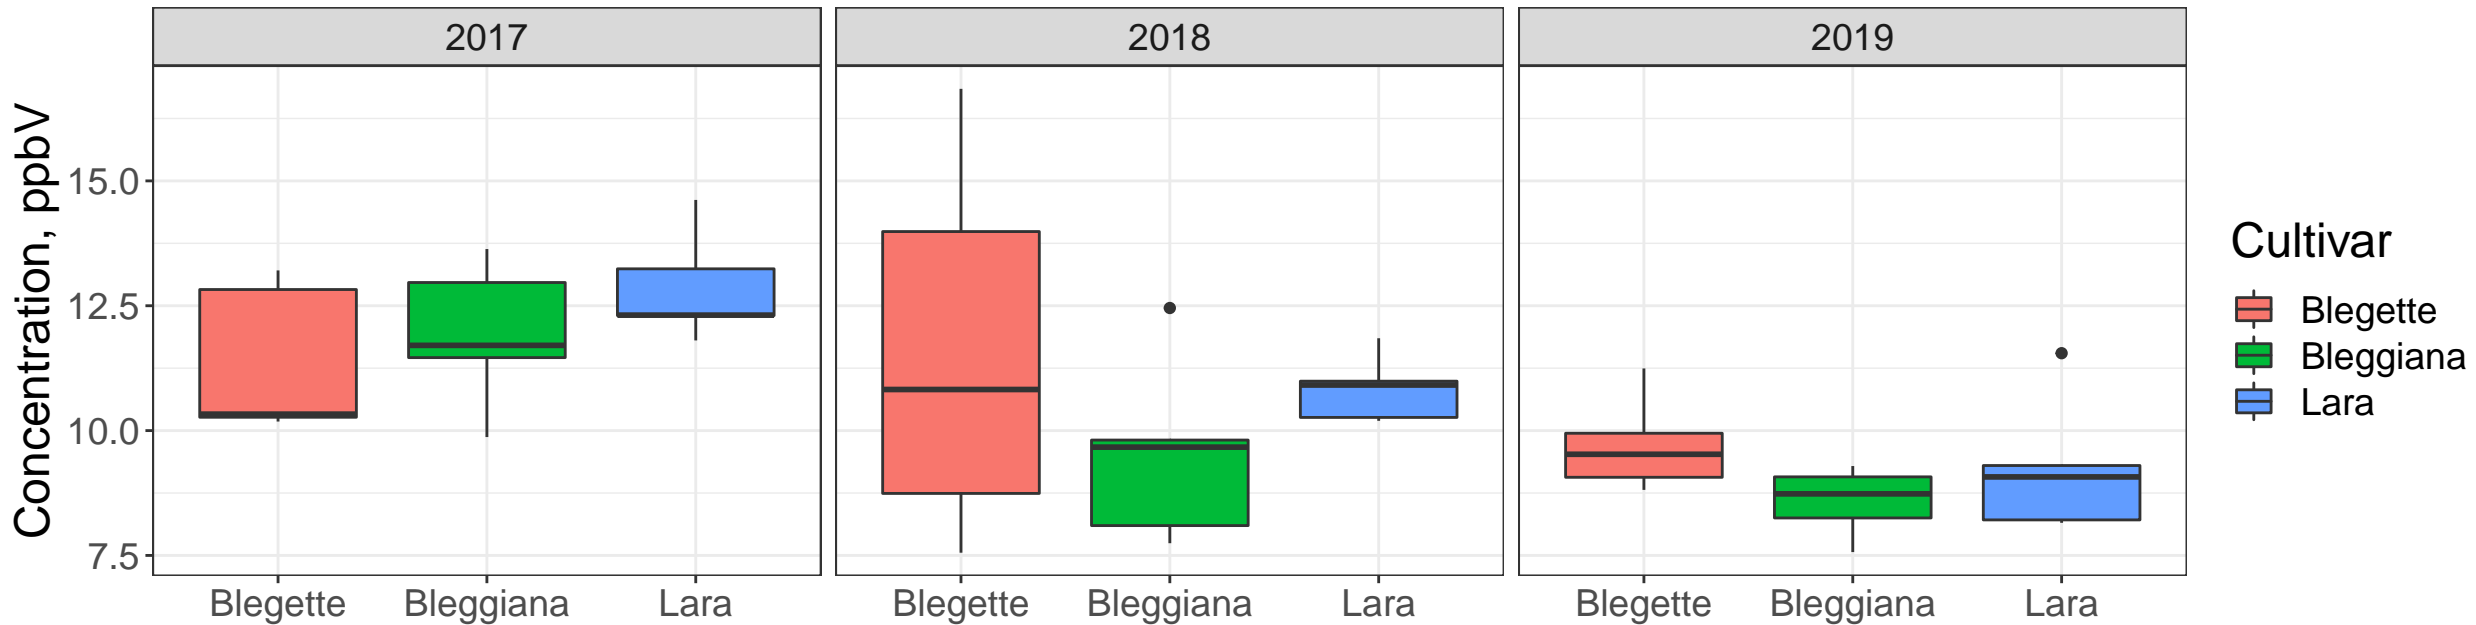

ms83.0863

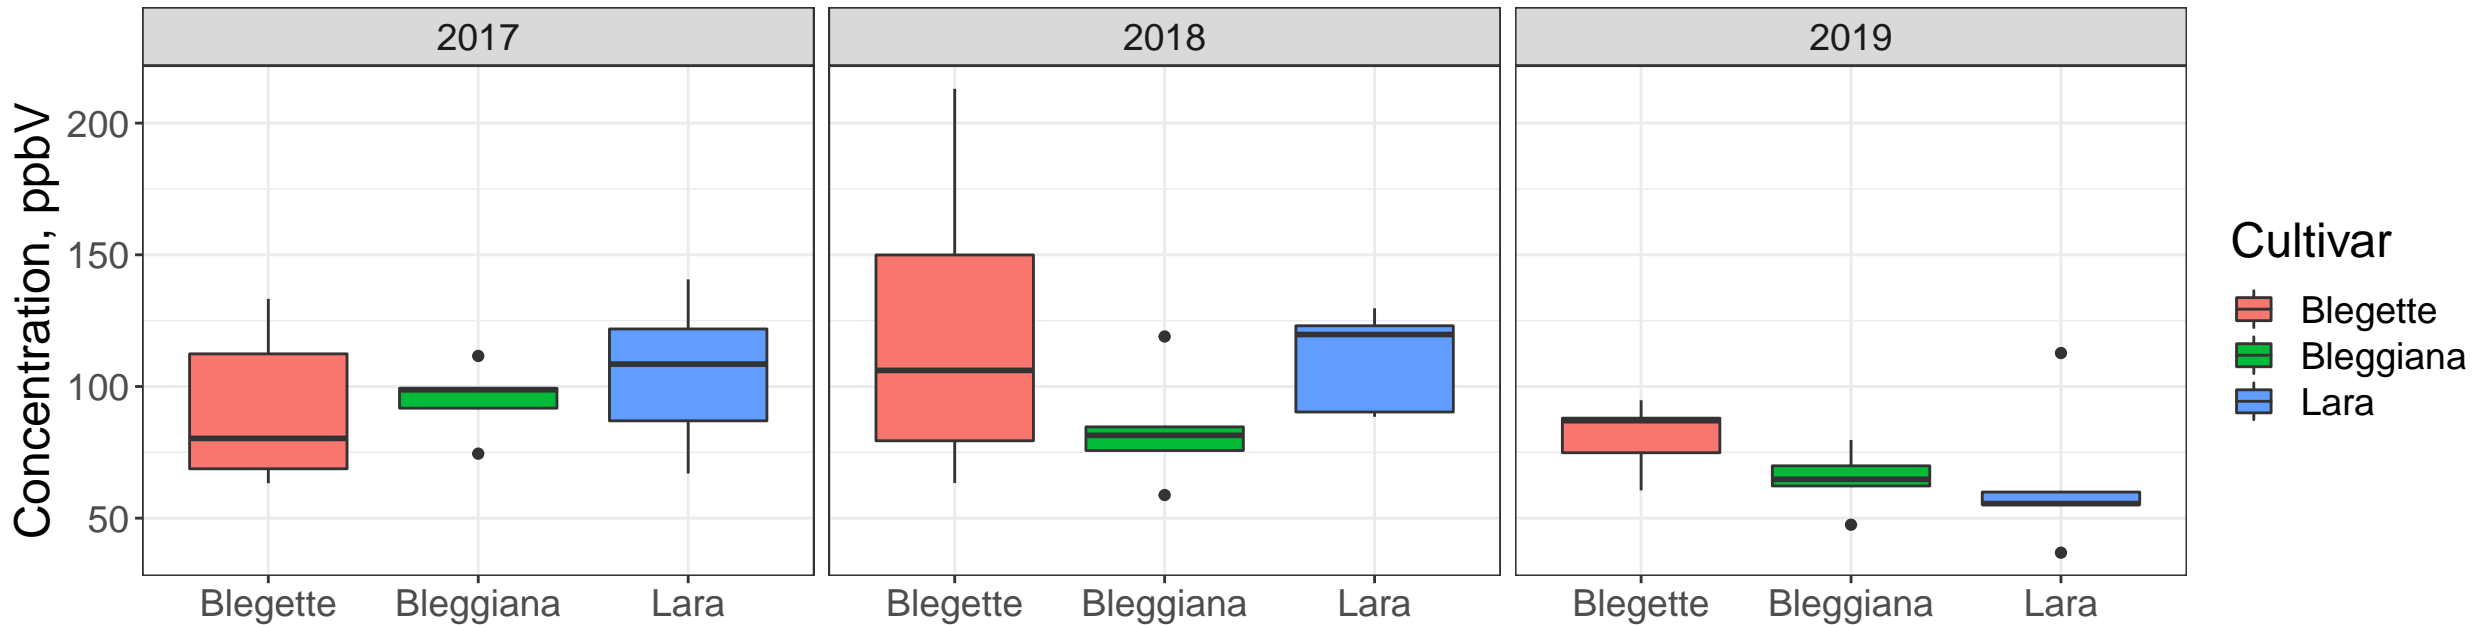

ms83.9508

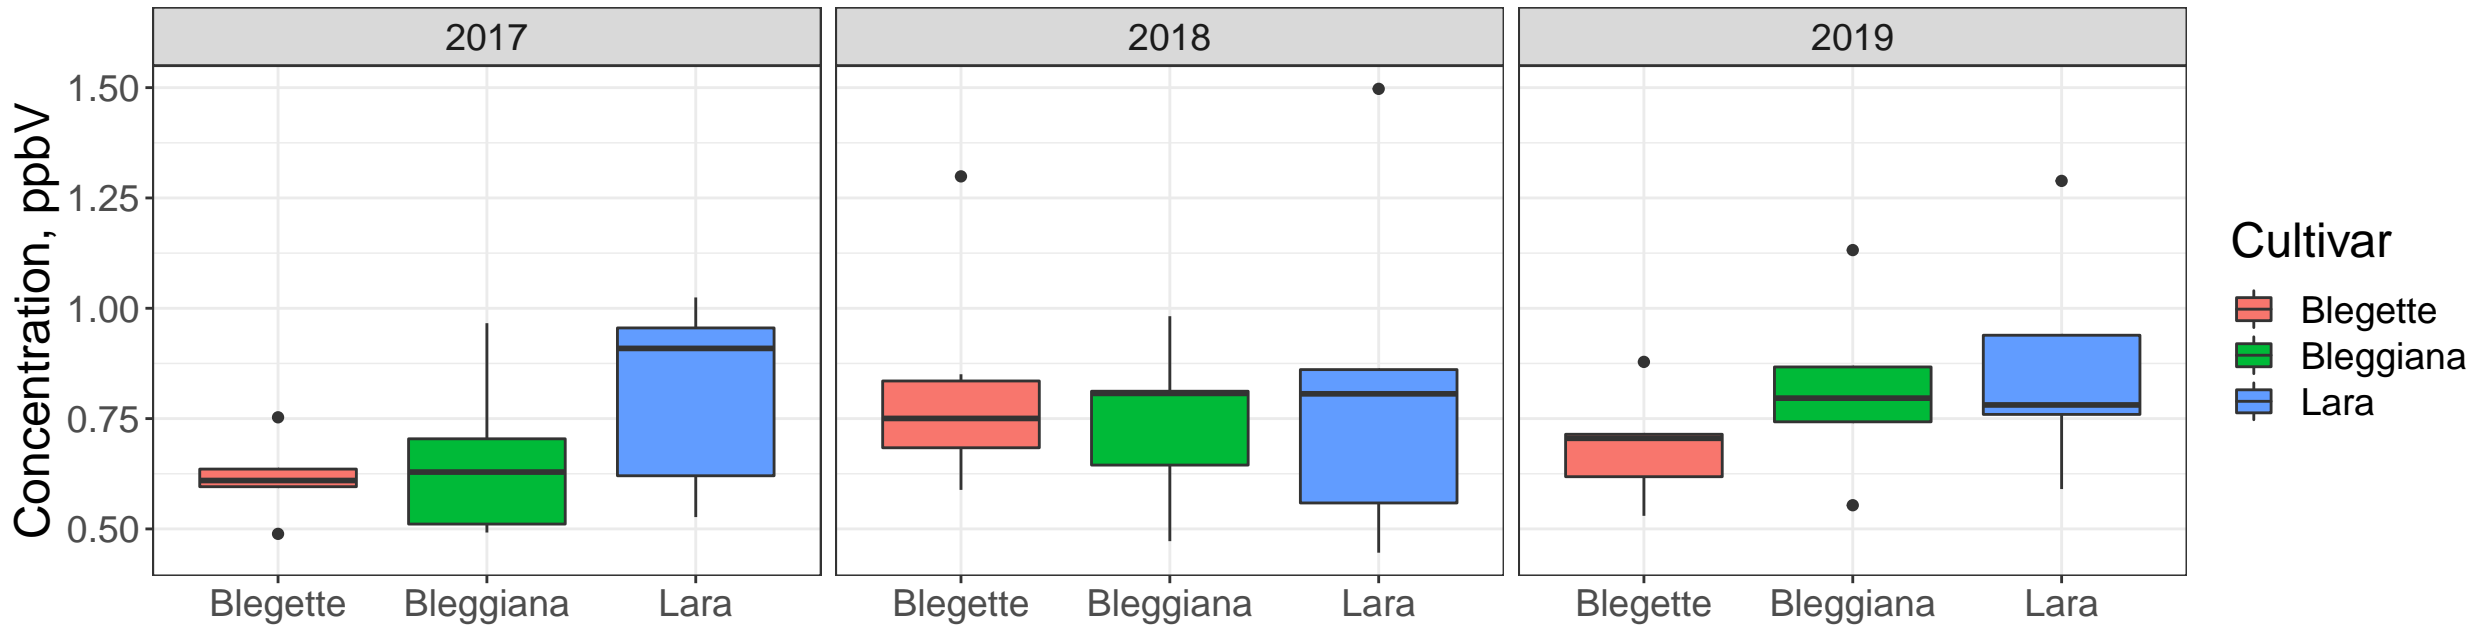

ms85.0657

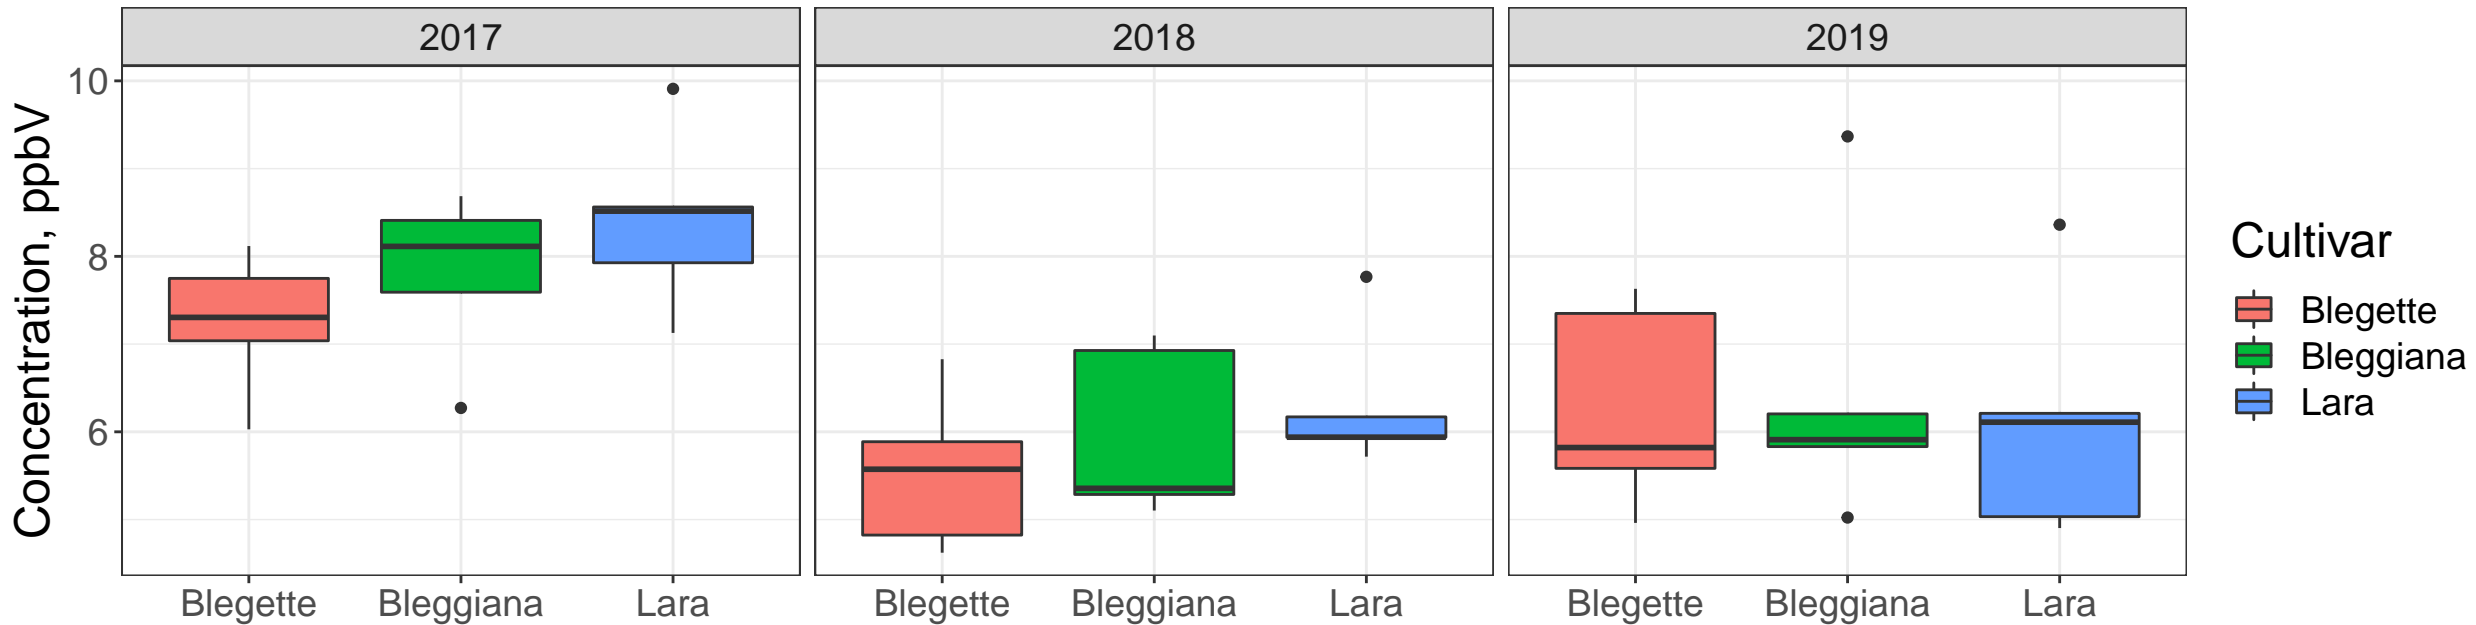

# ms85.1018

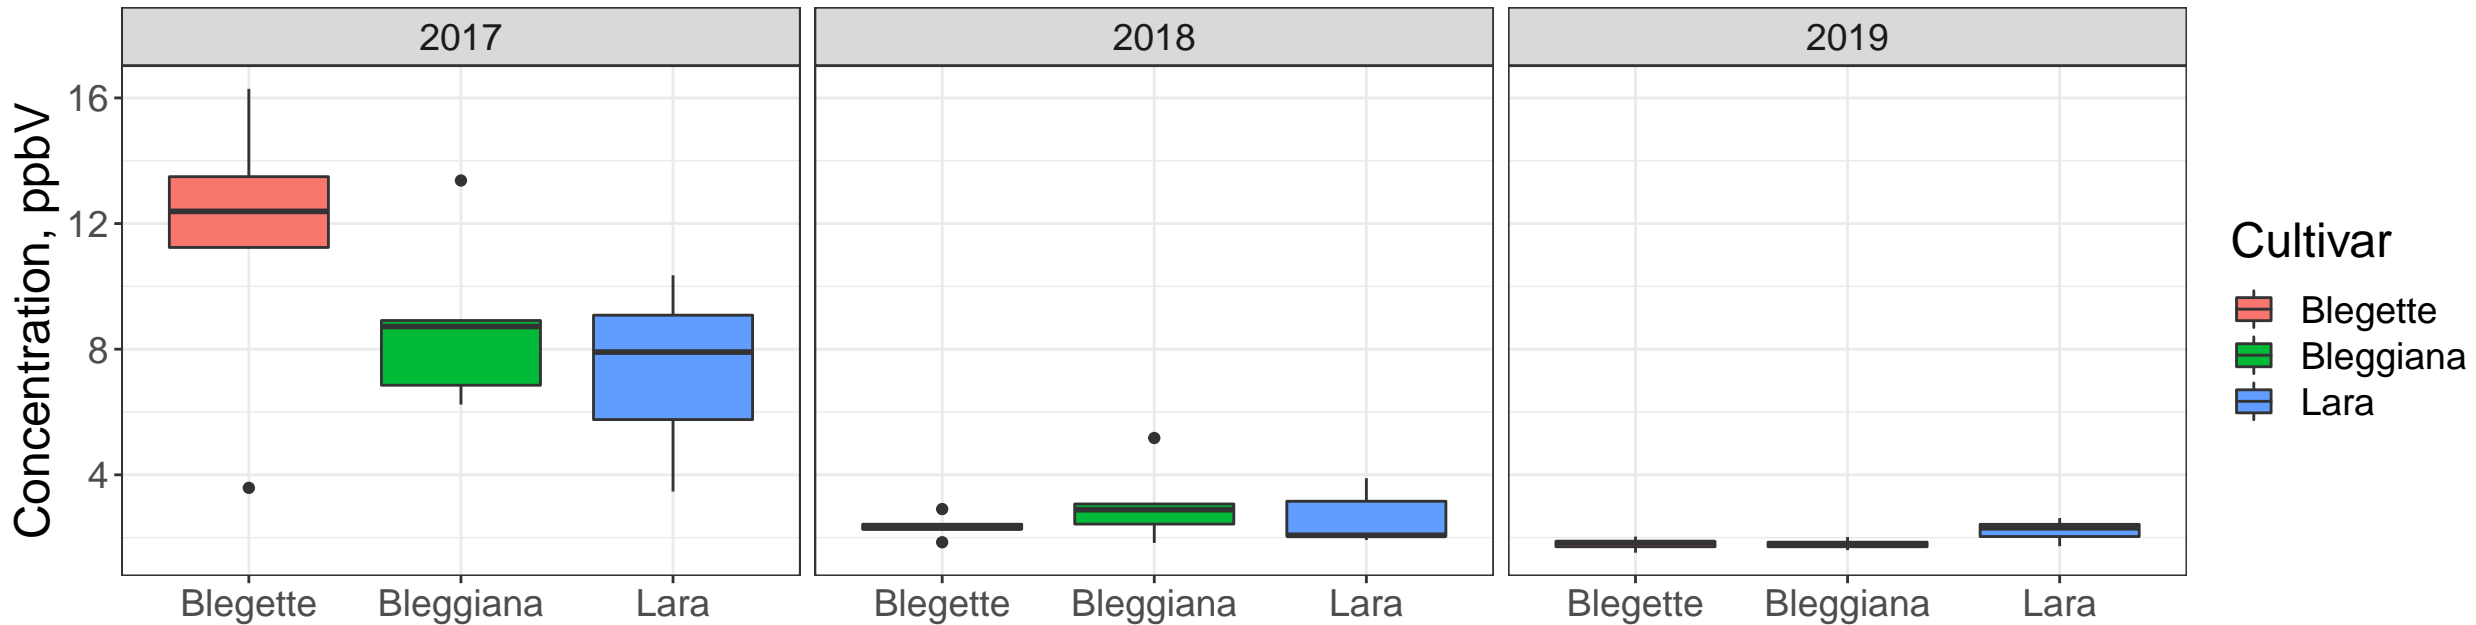

ms87.0446

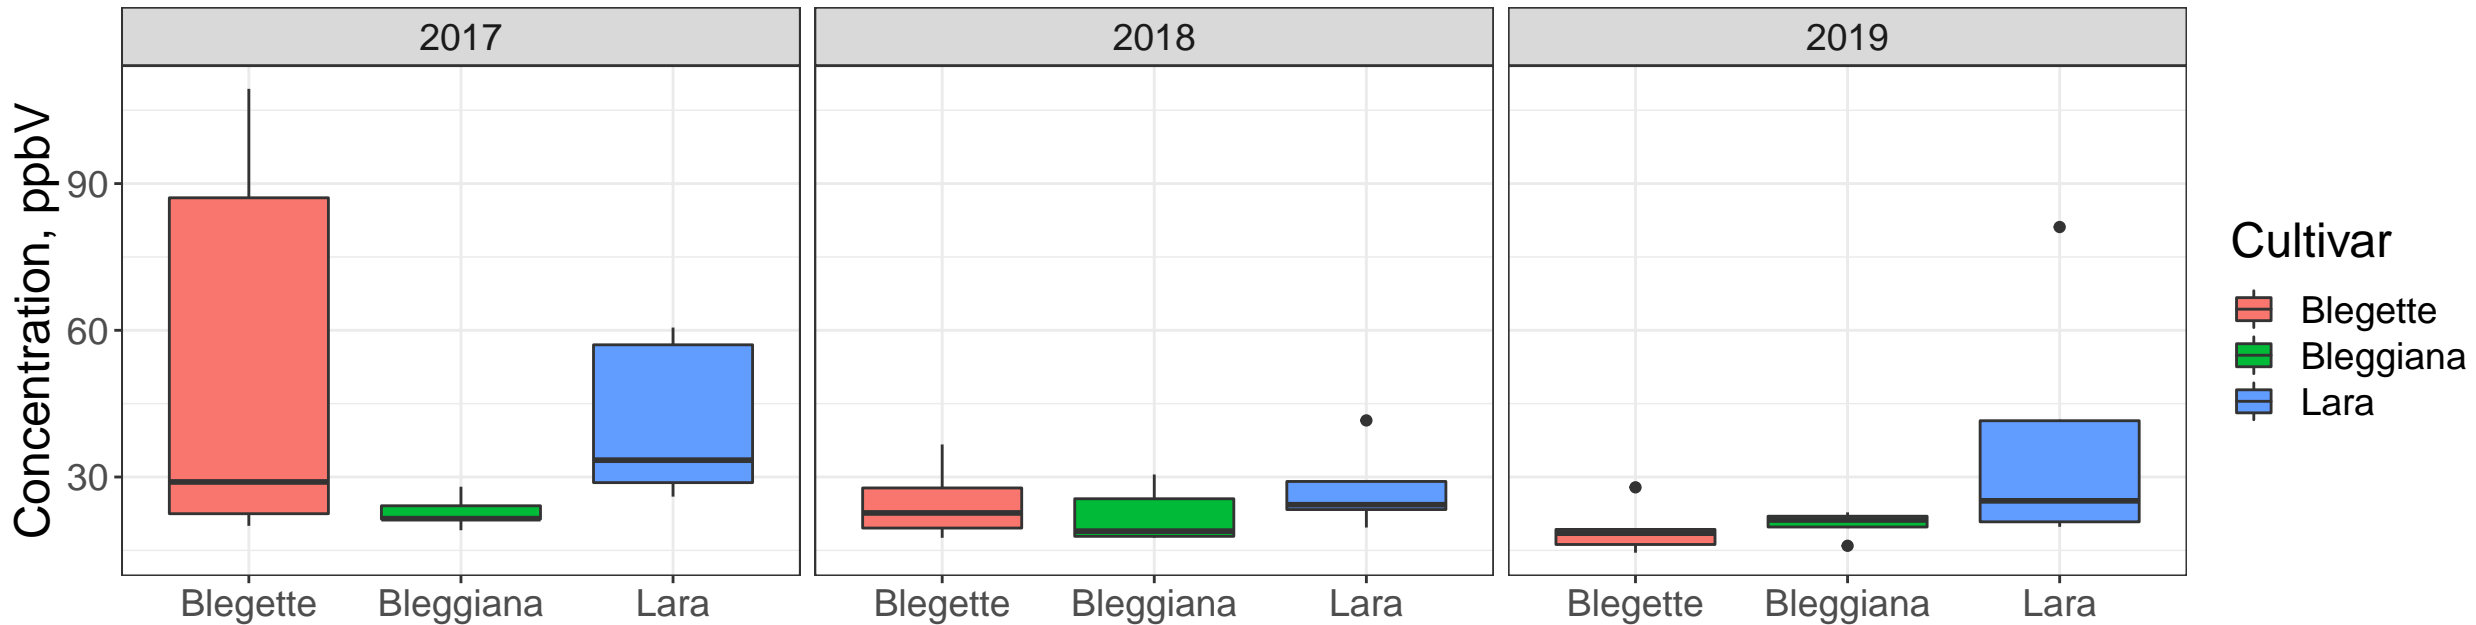

ms87.0812

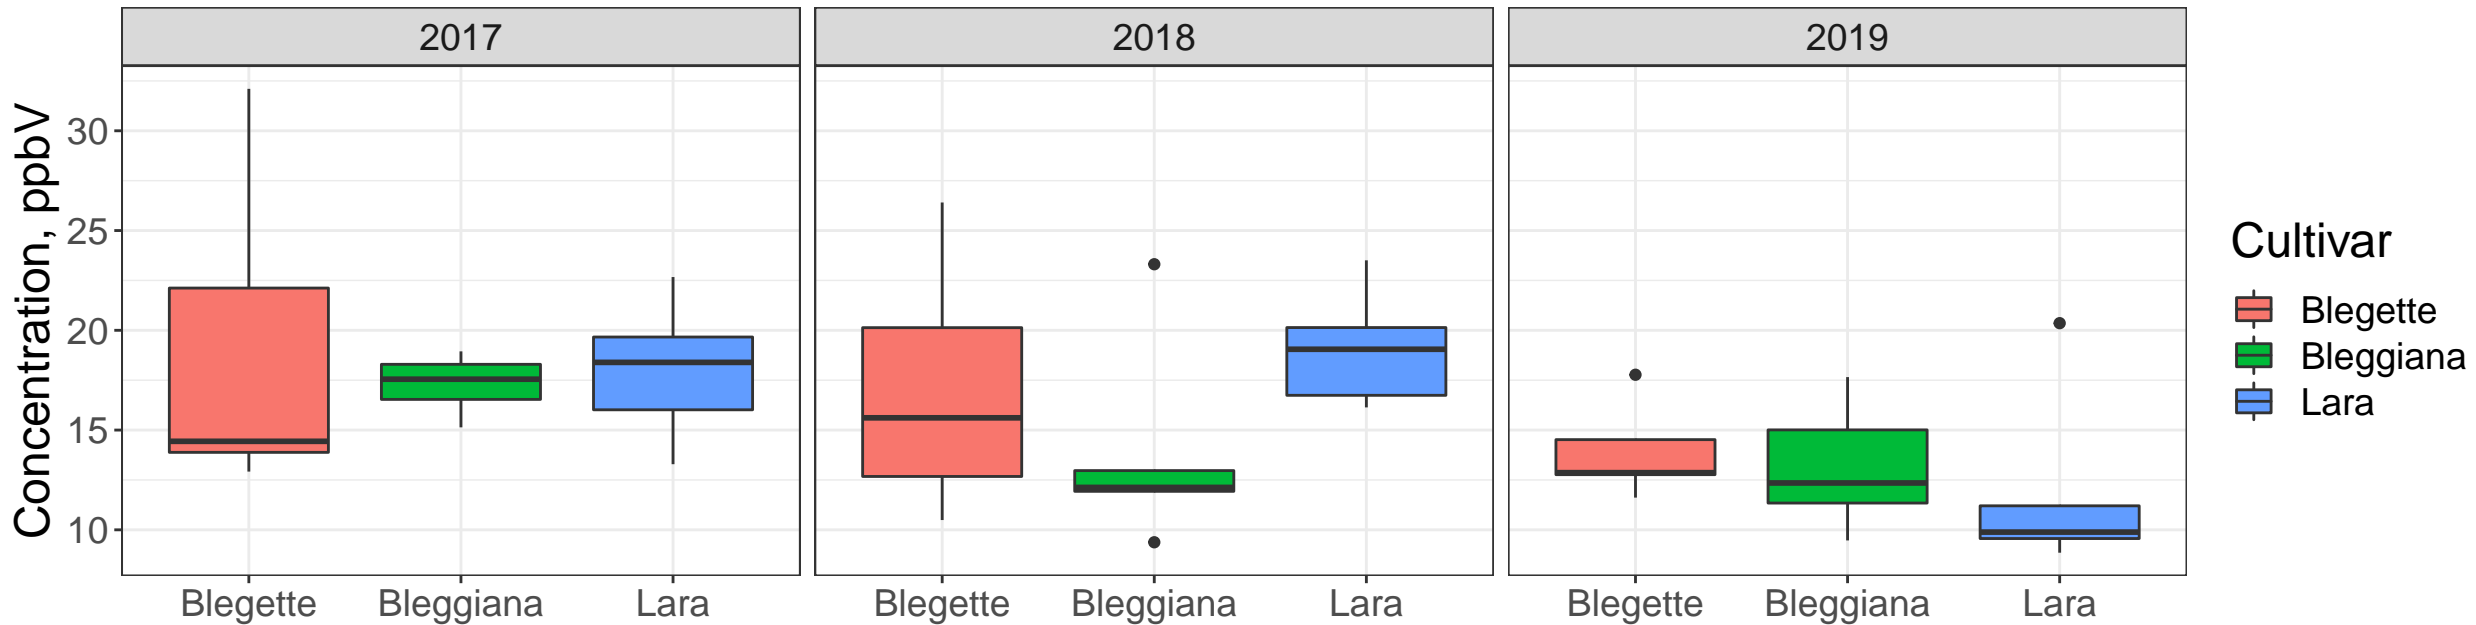



ms88.9530

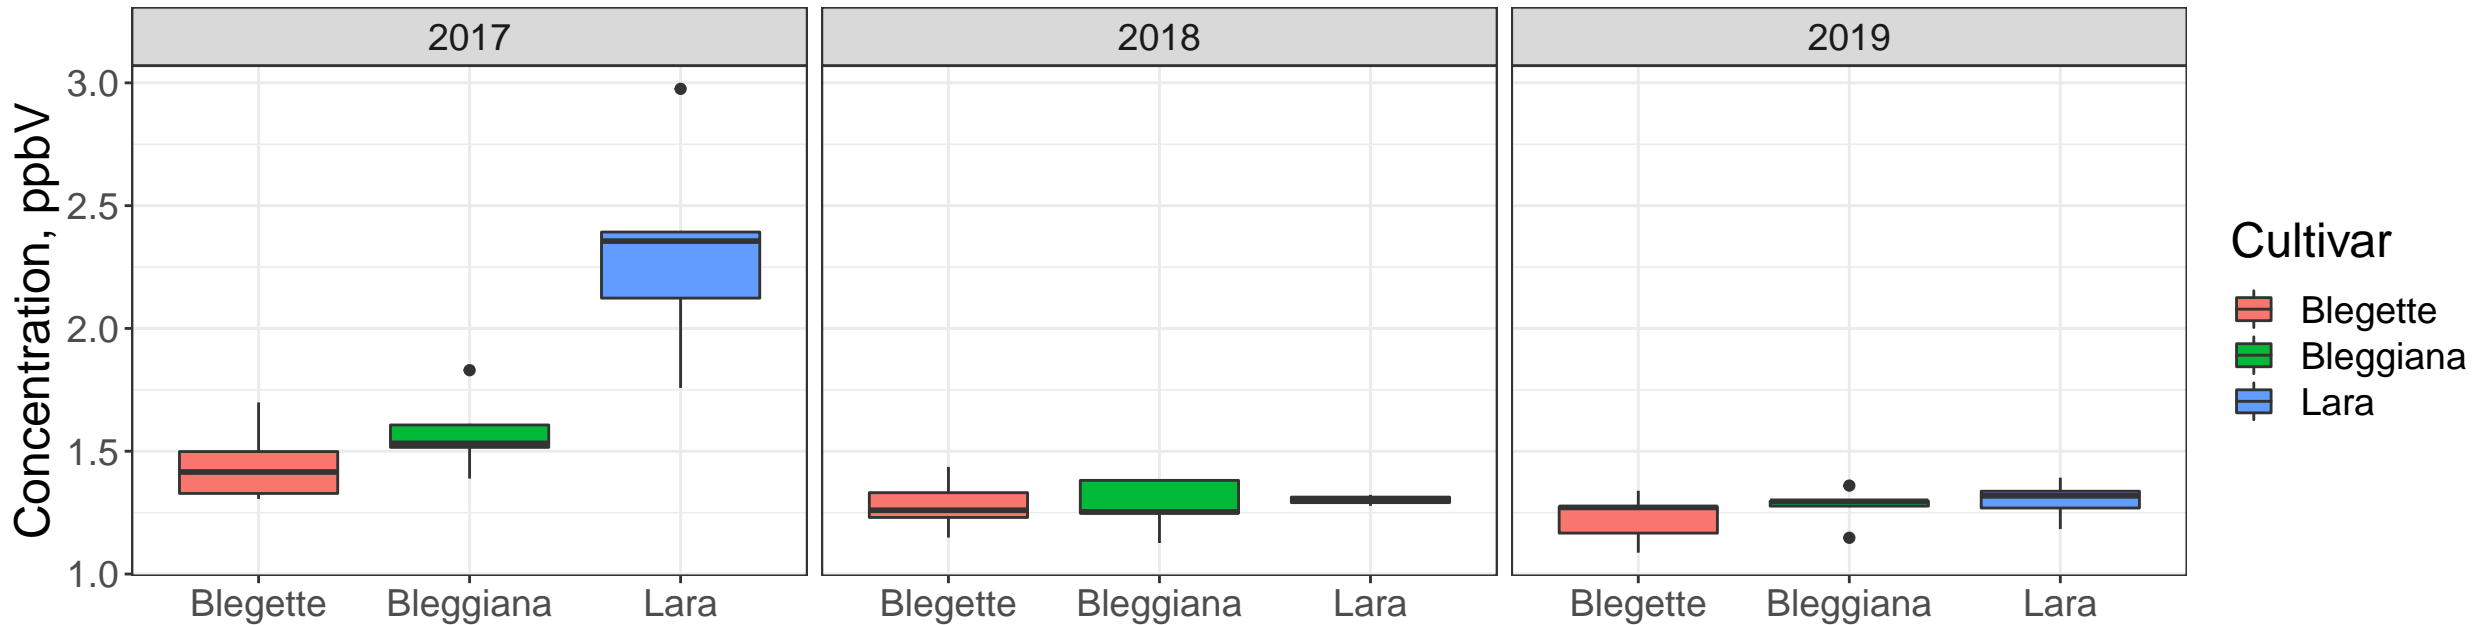

ms88.9774

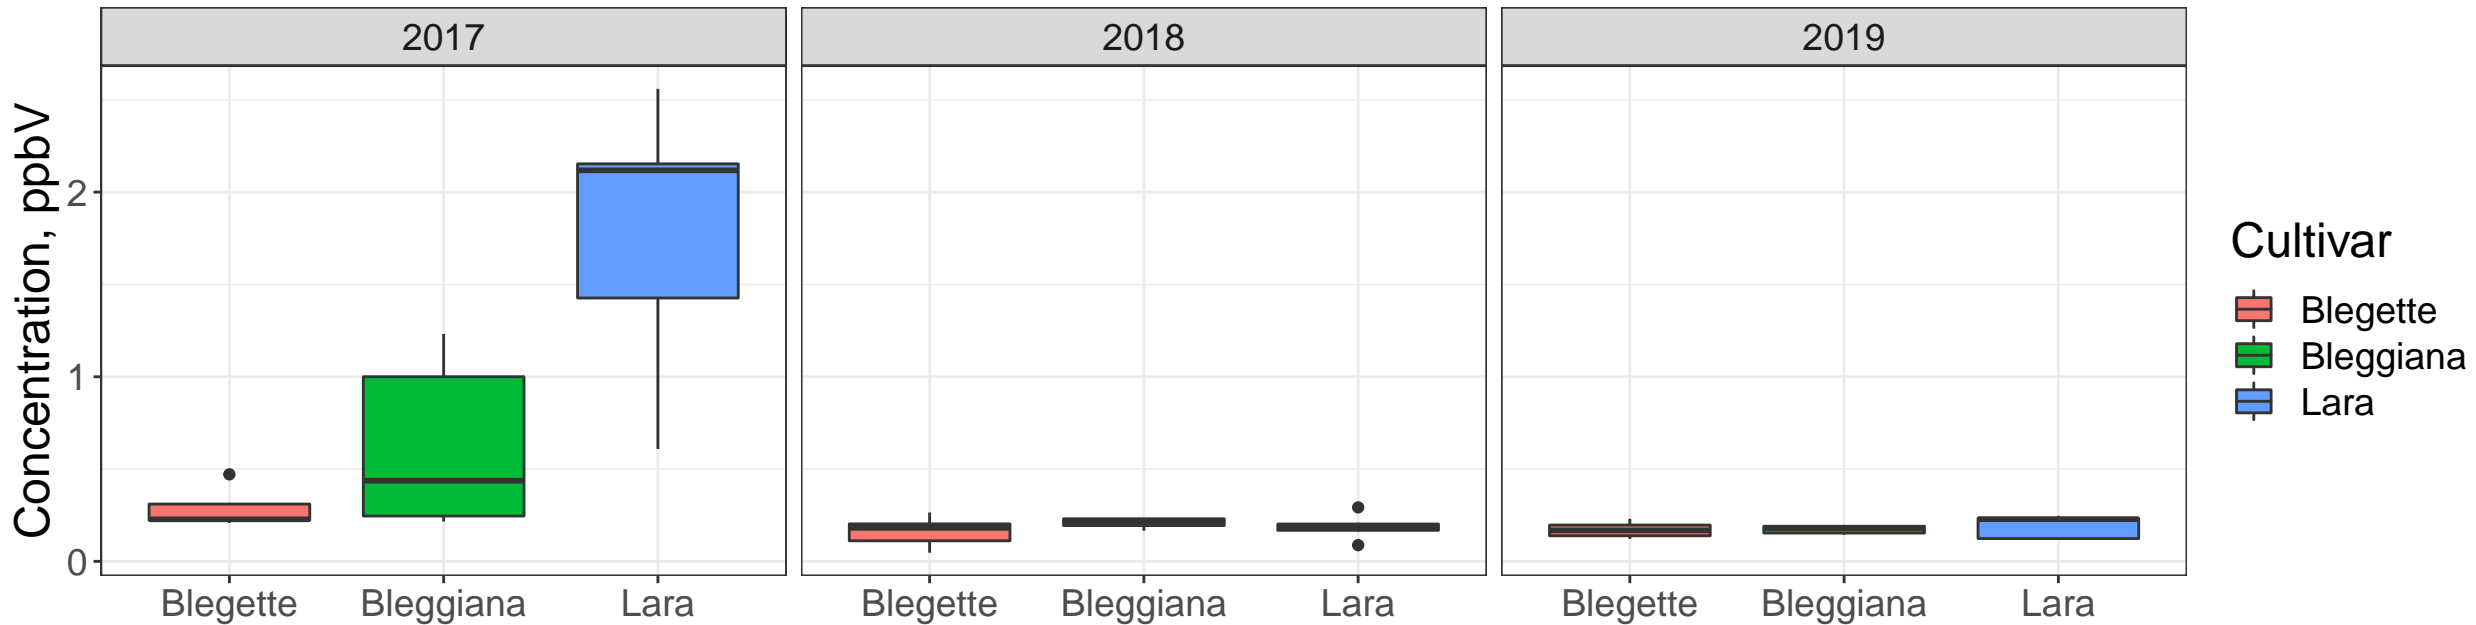

# ms89.0595

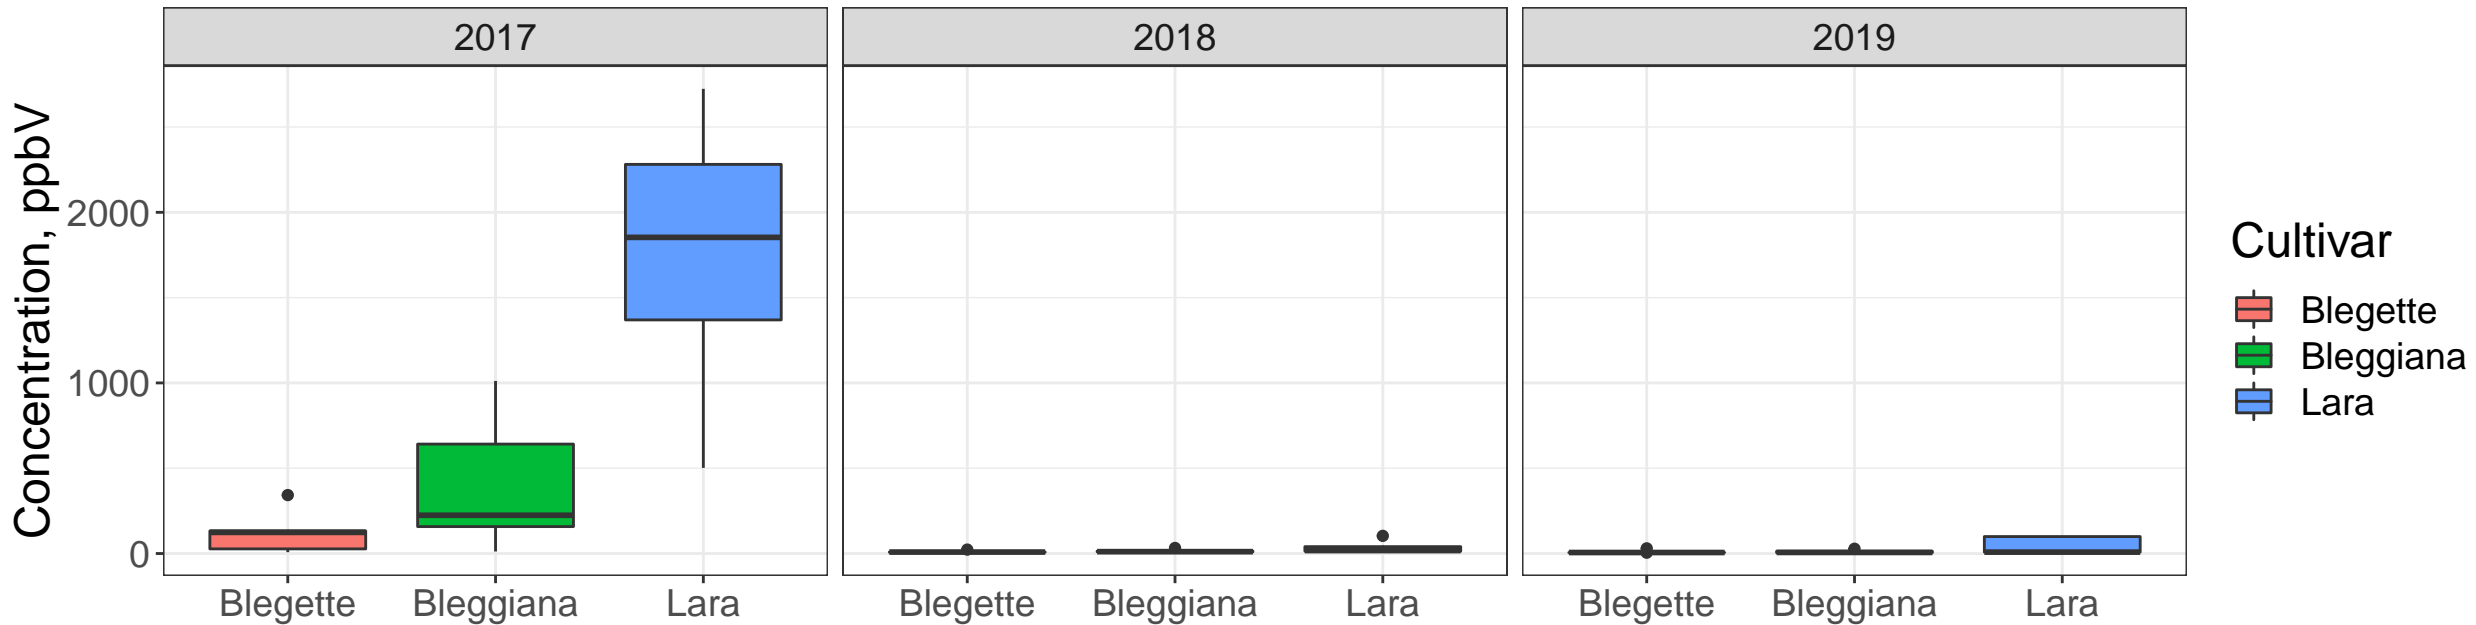

ms91.0525

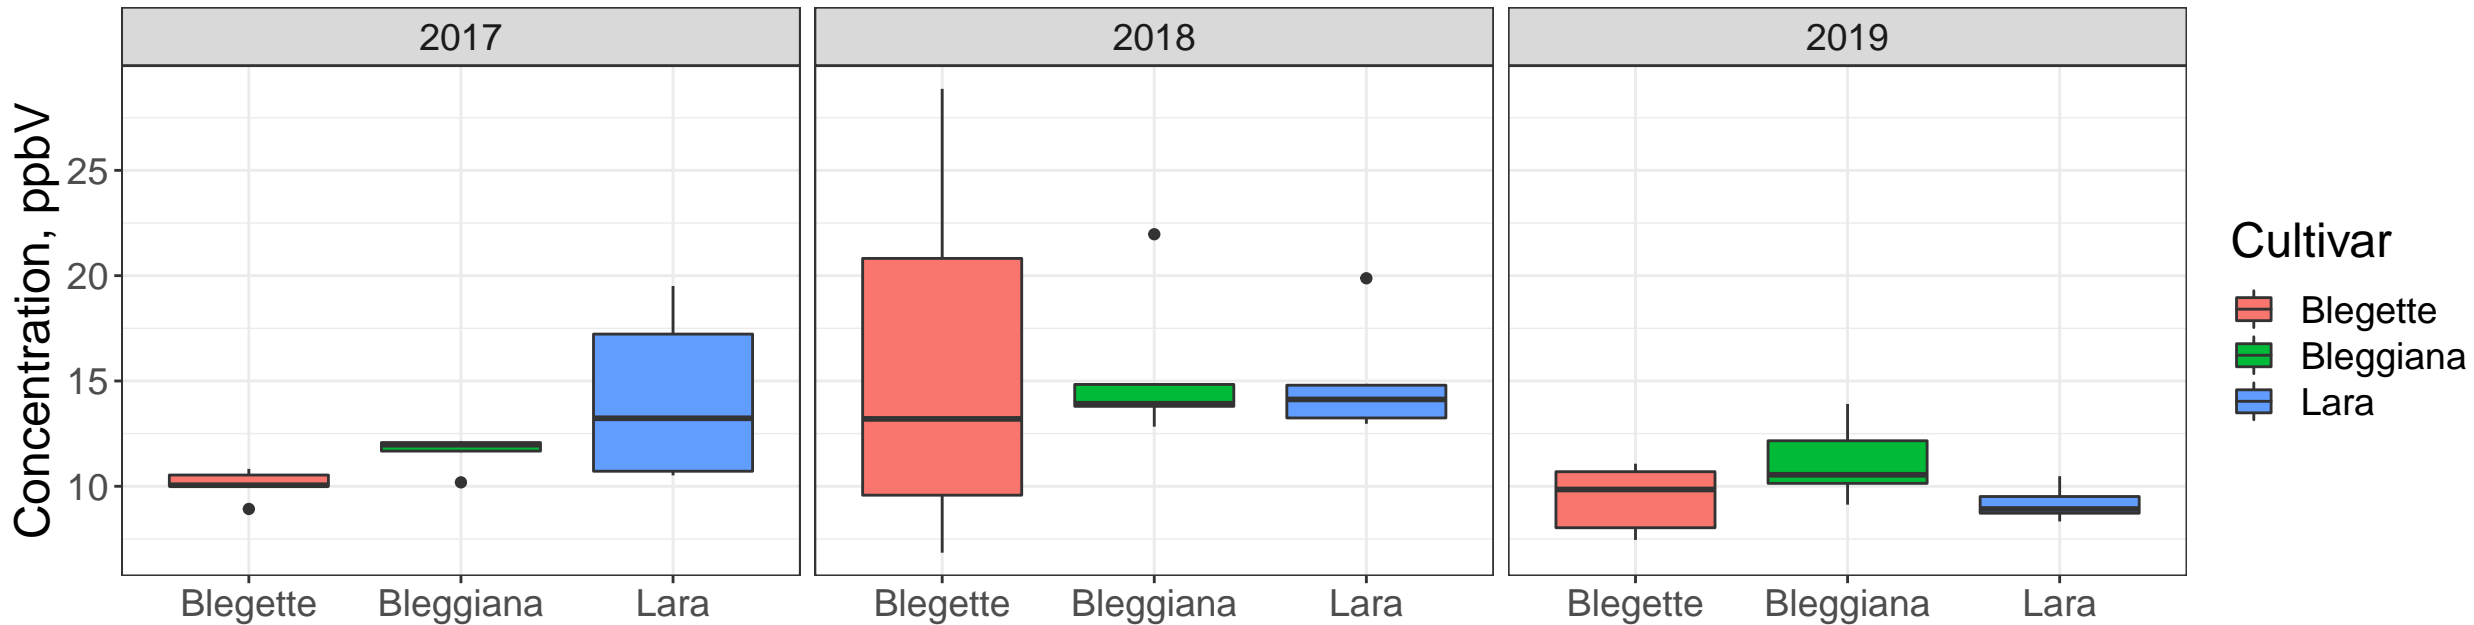

ms91.0734

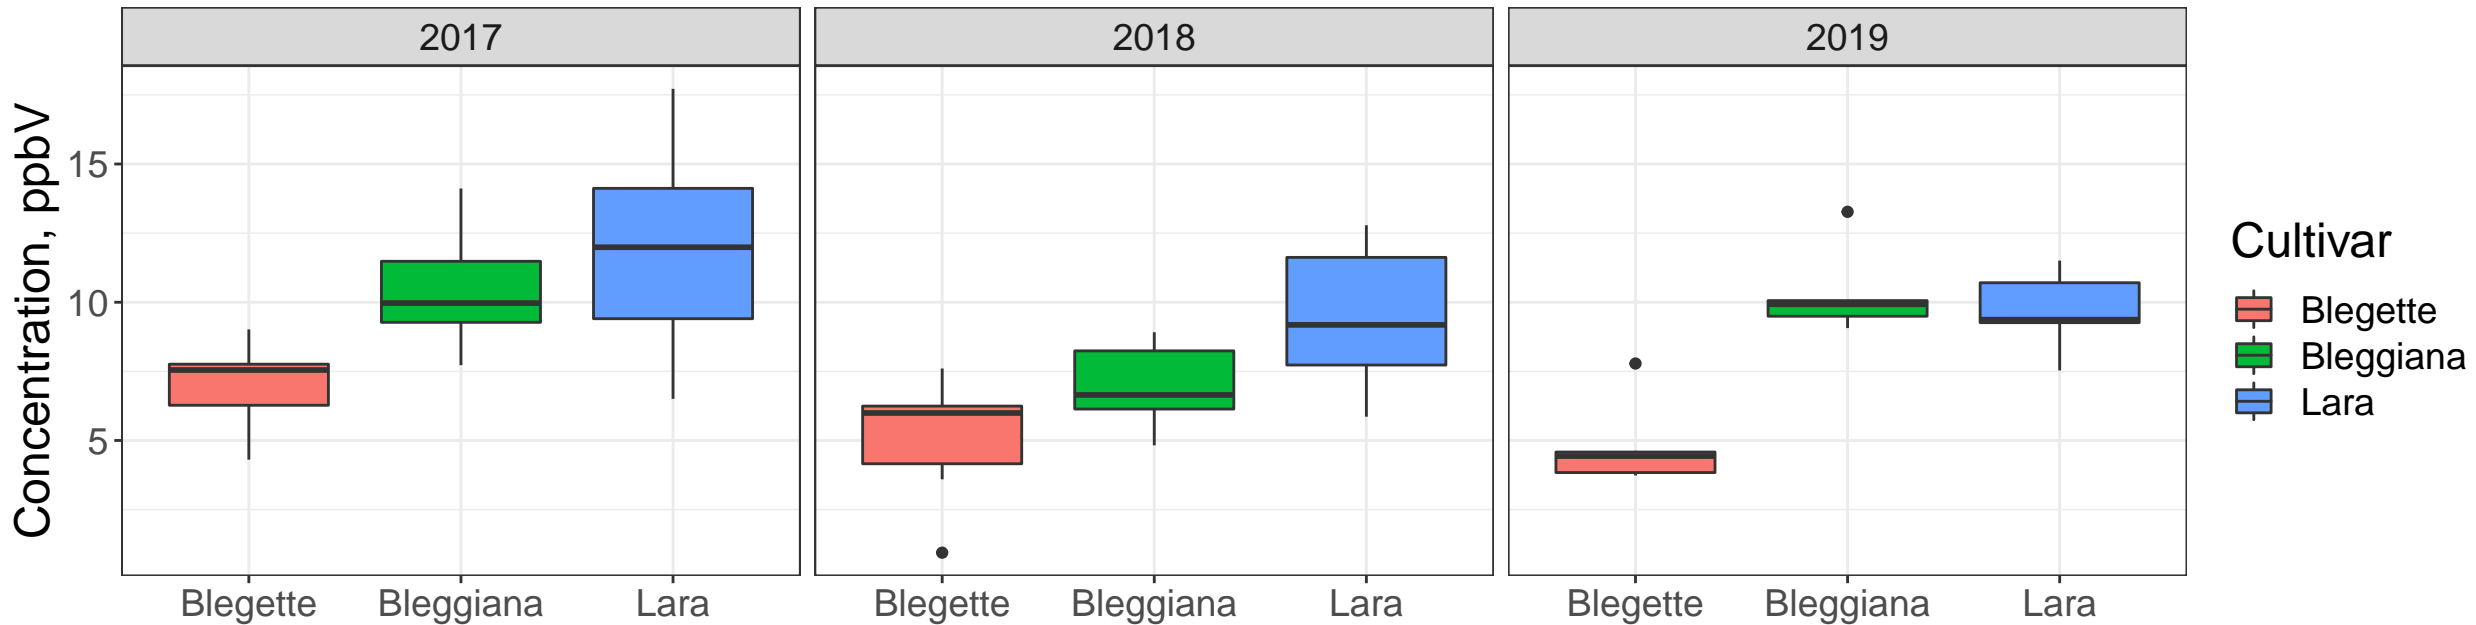

# ms94.0921

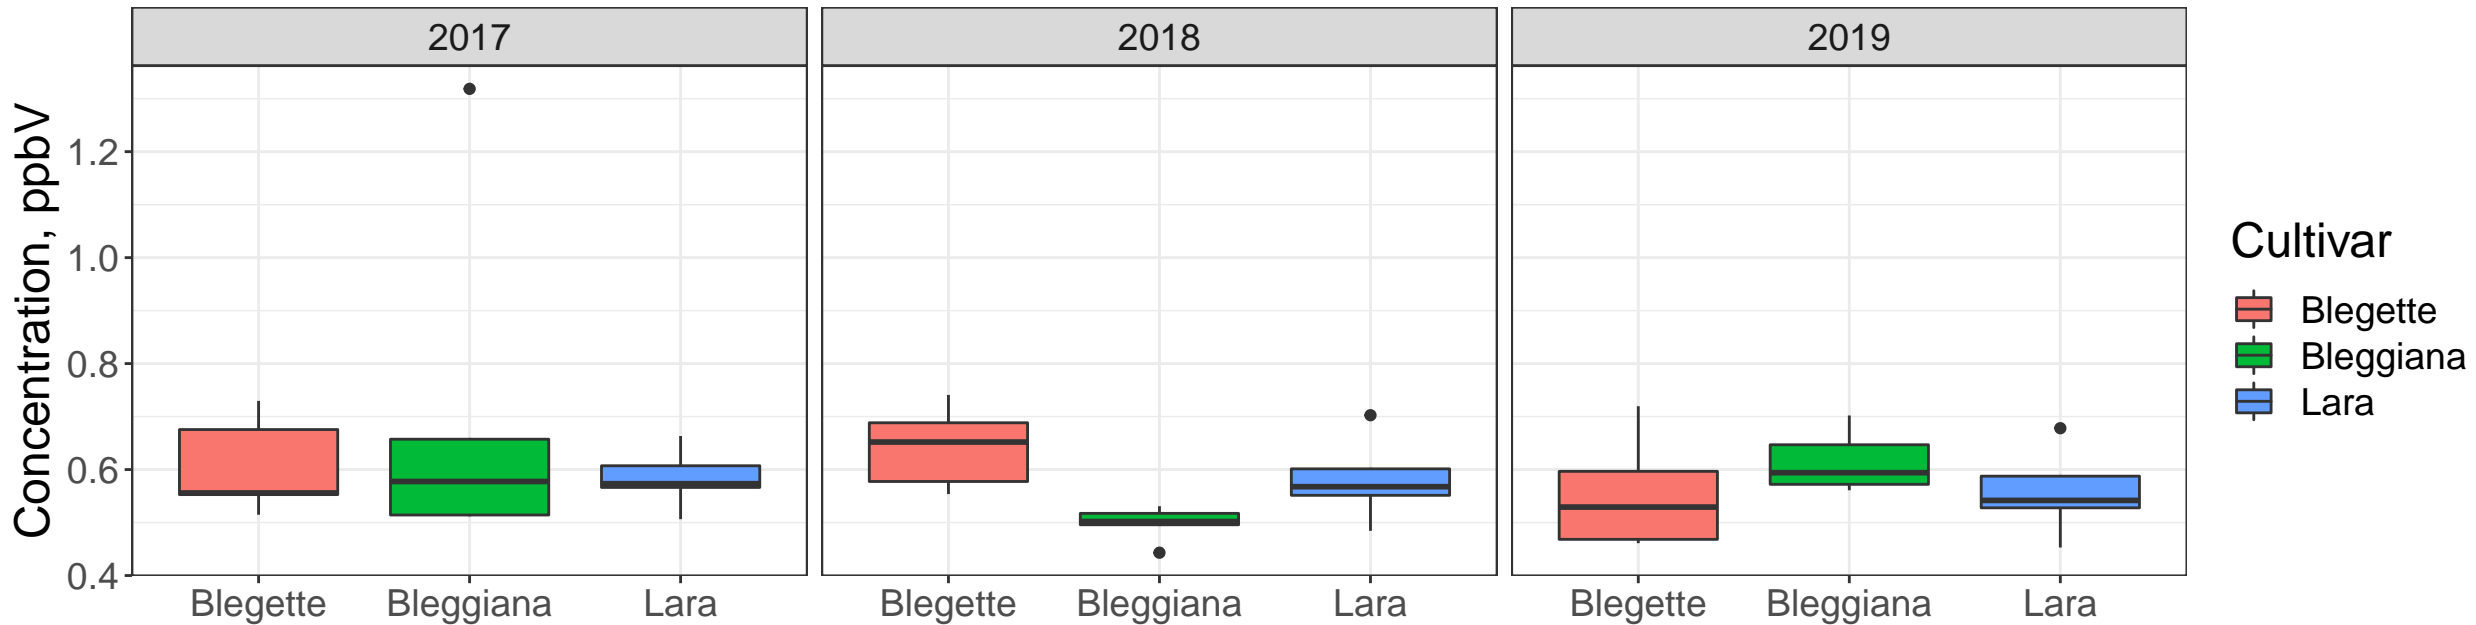

ms97.0287

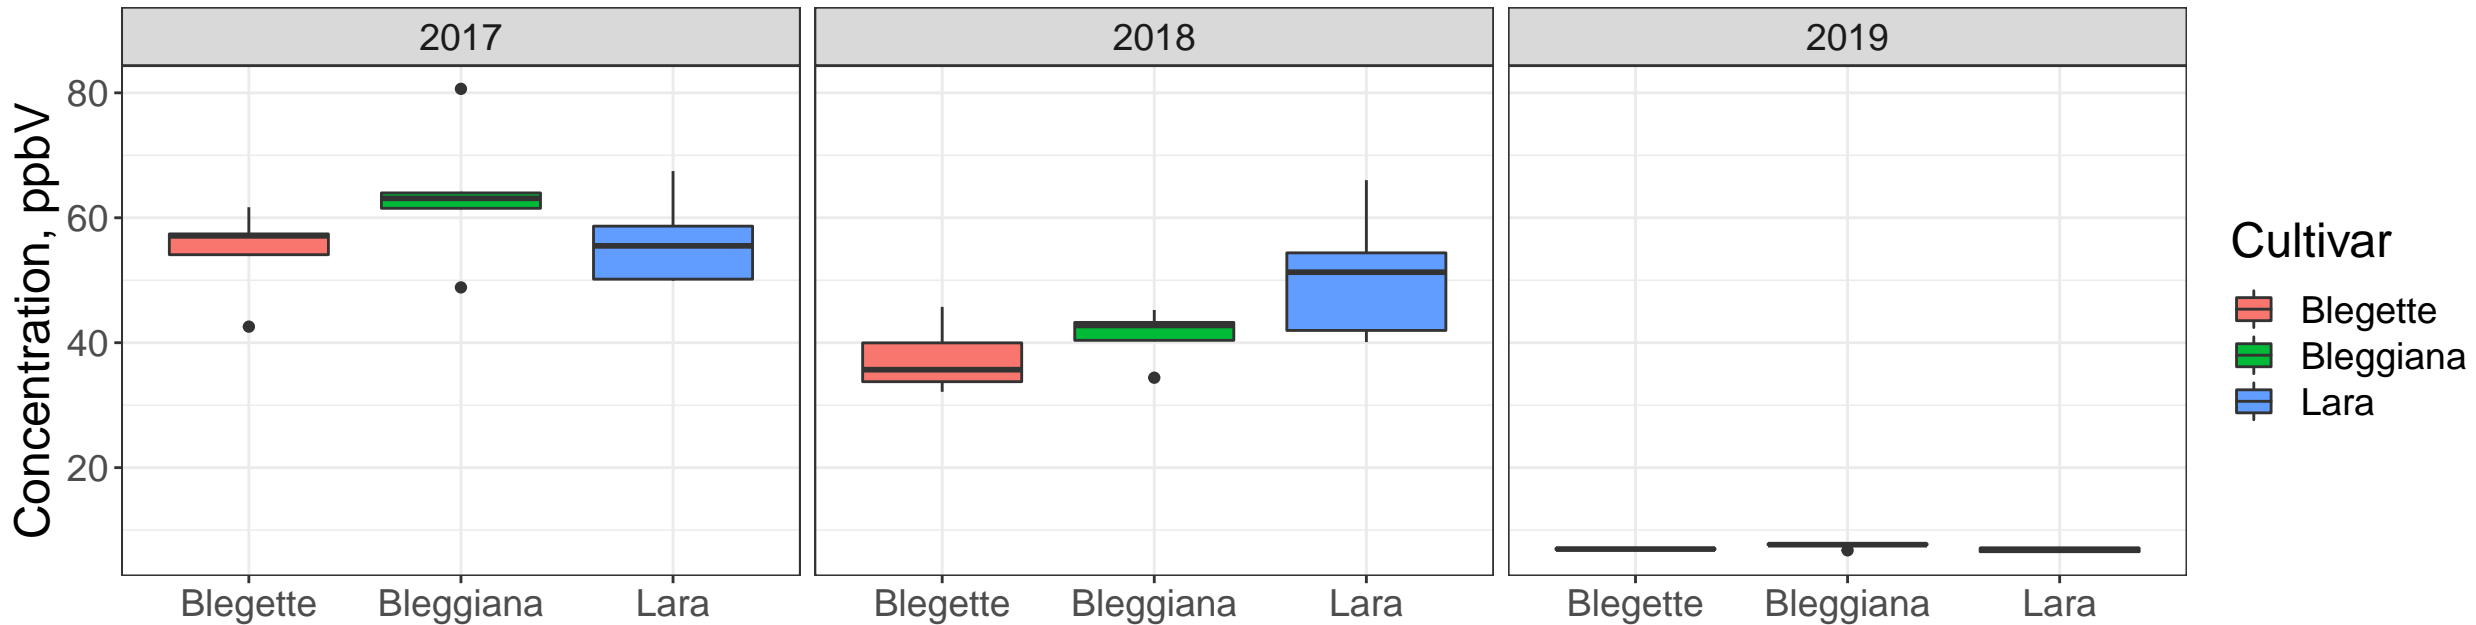

ms97.0676

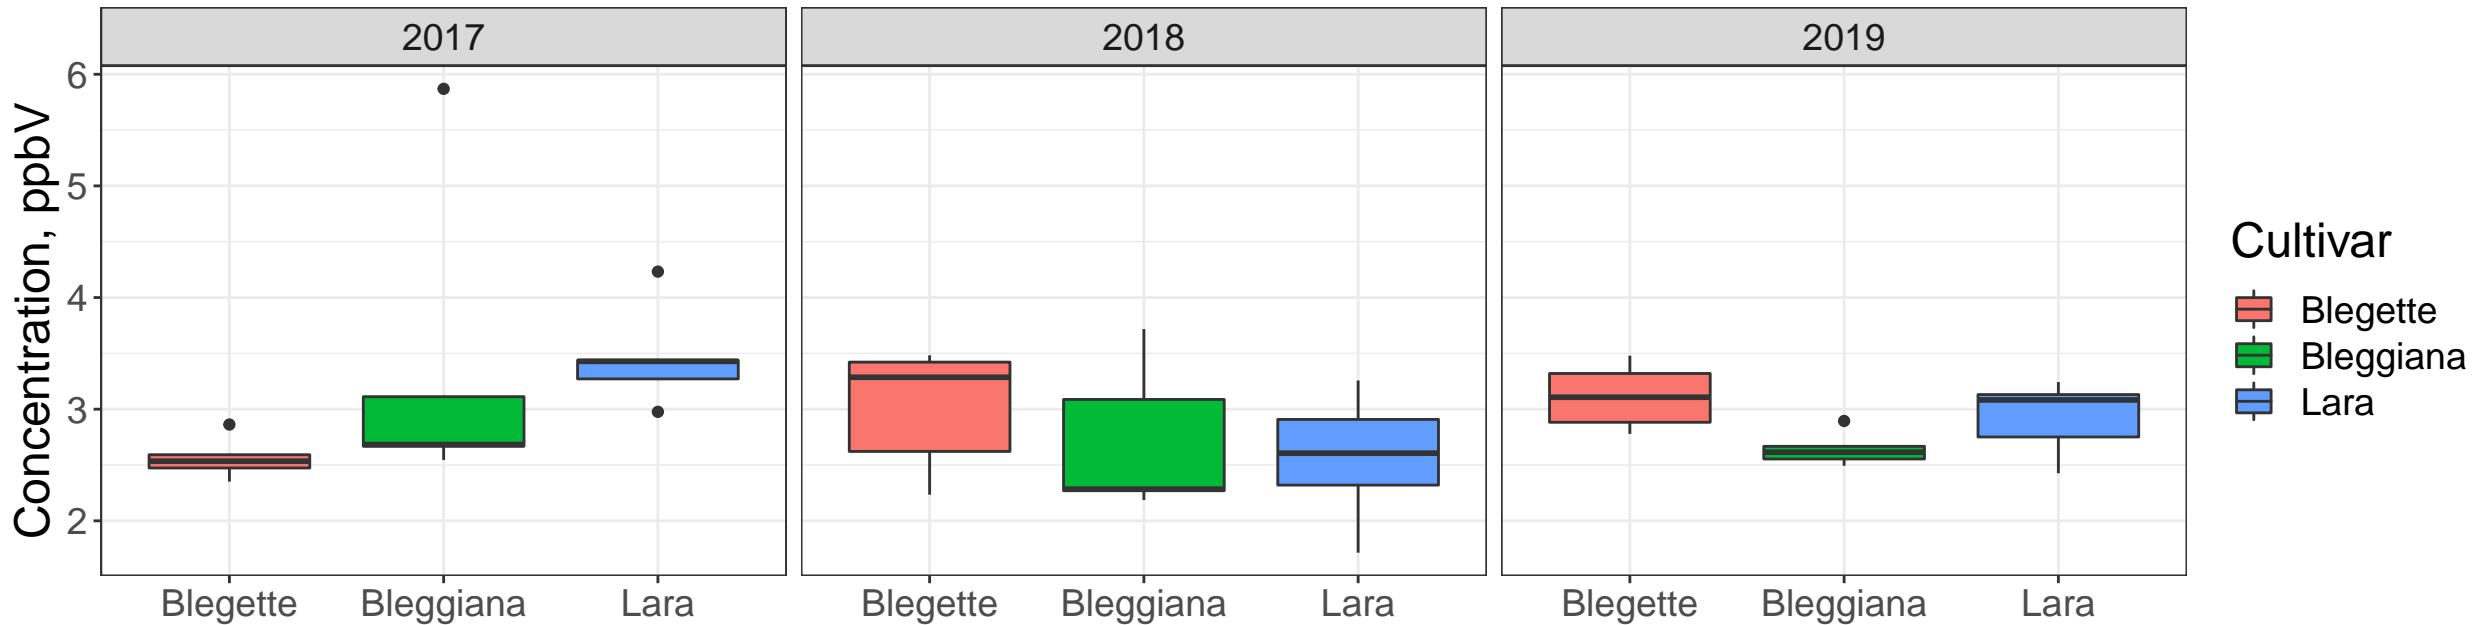



ms98.9593

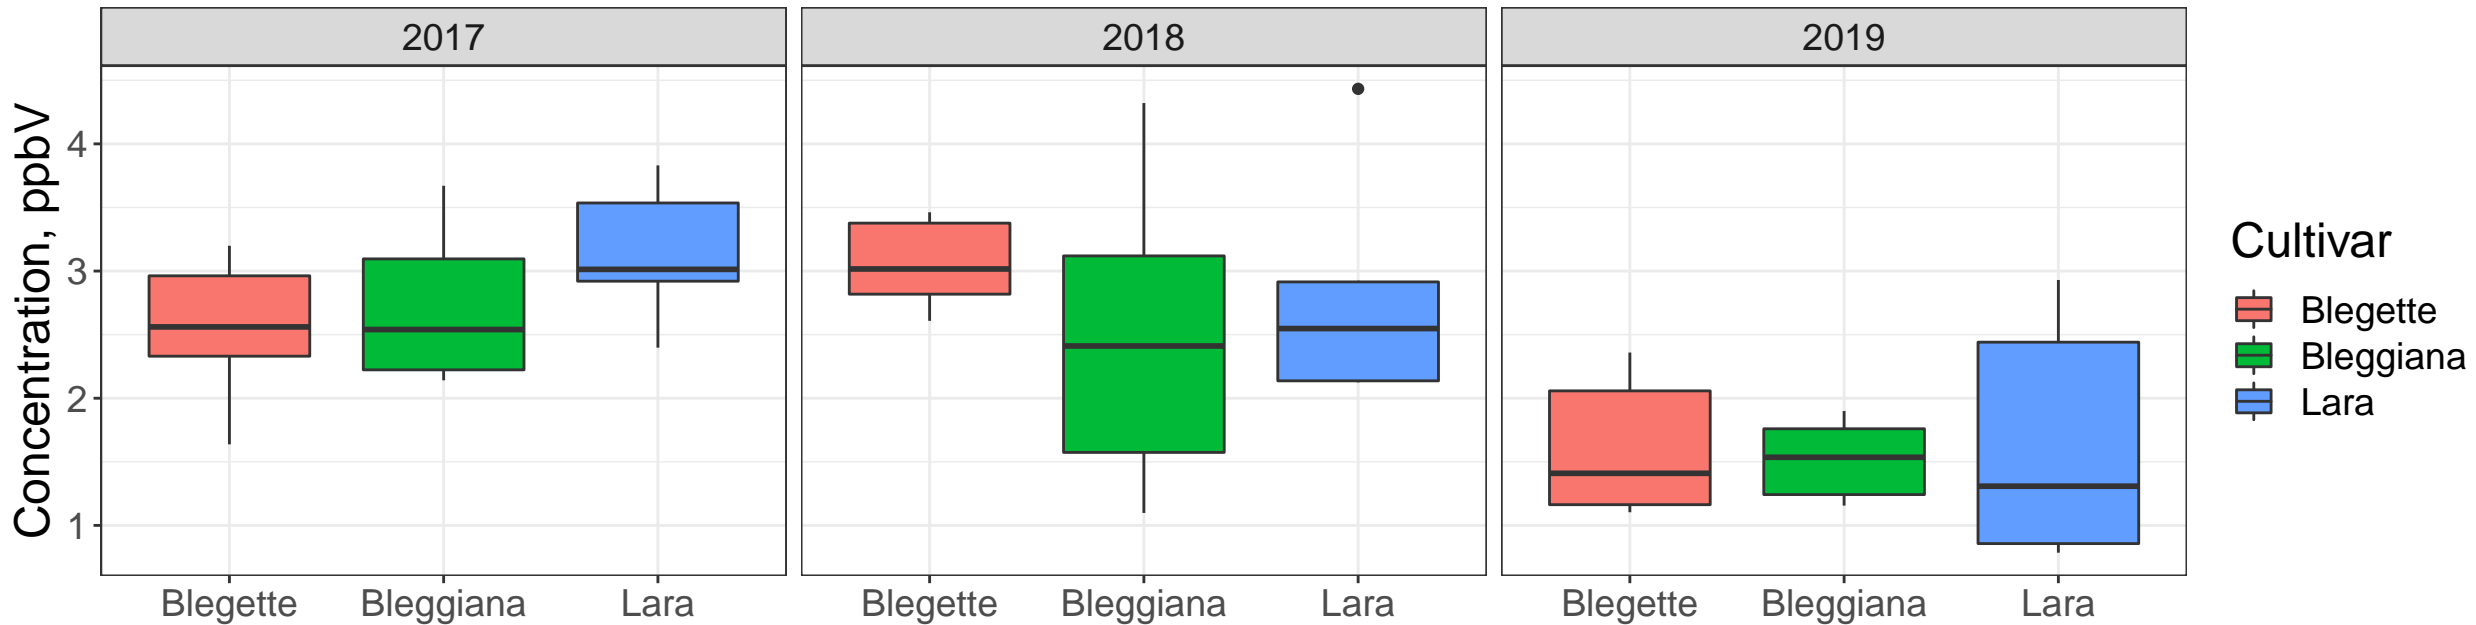

ms99.0817

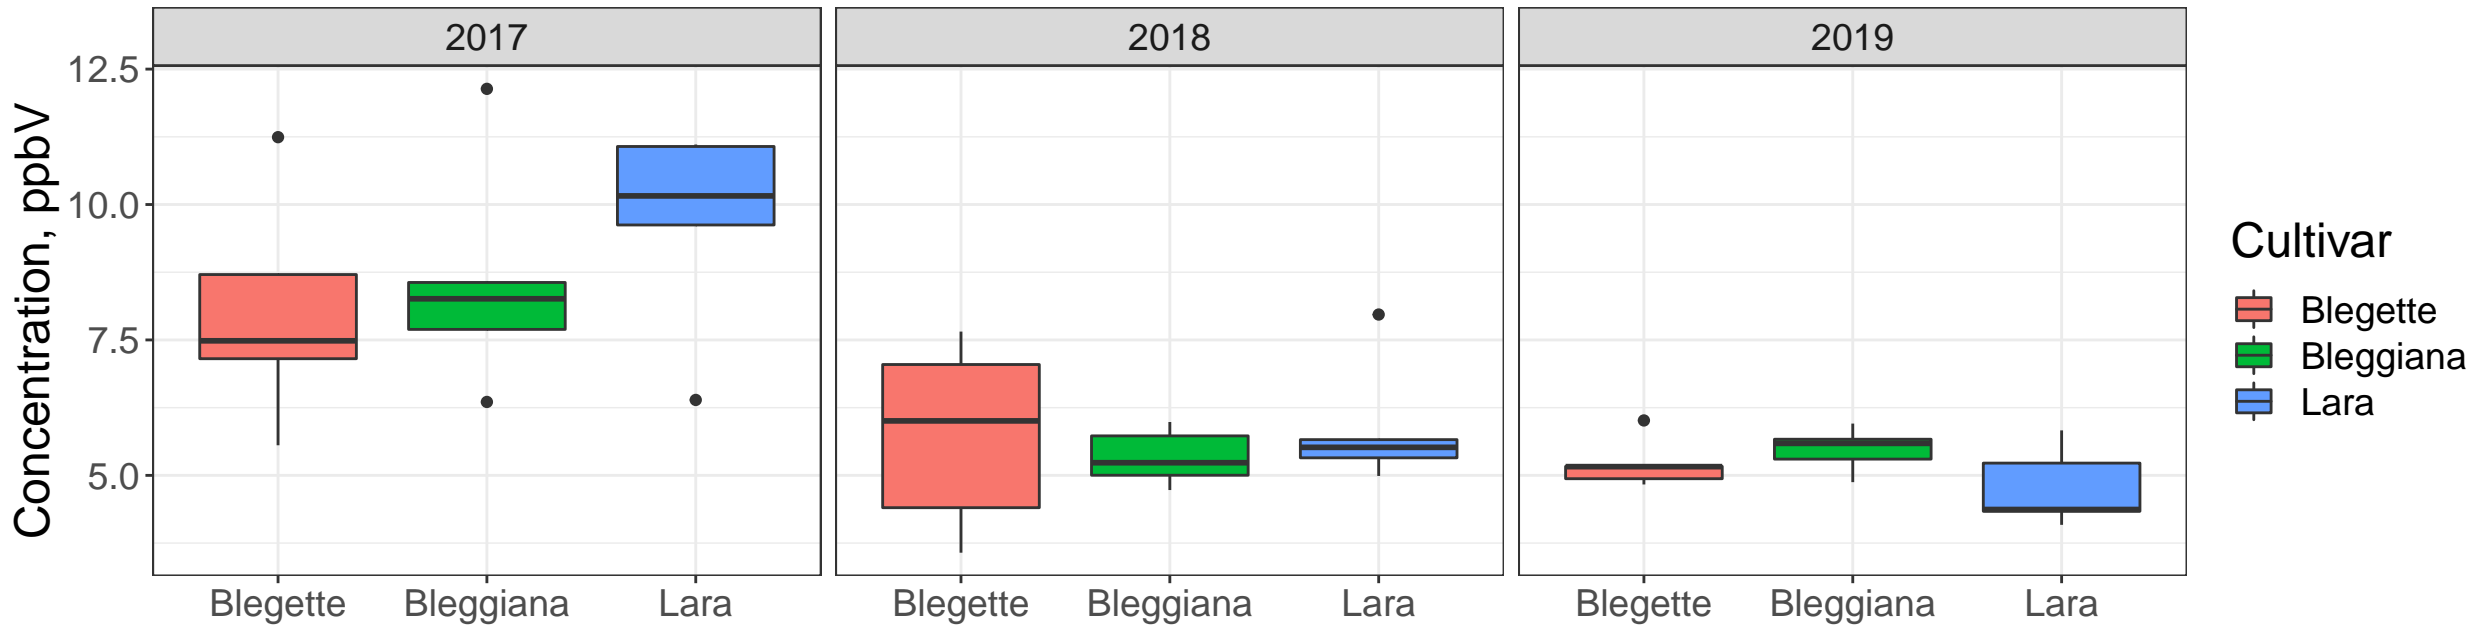

ms101.0972

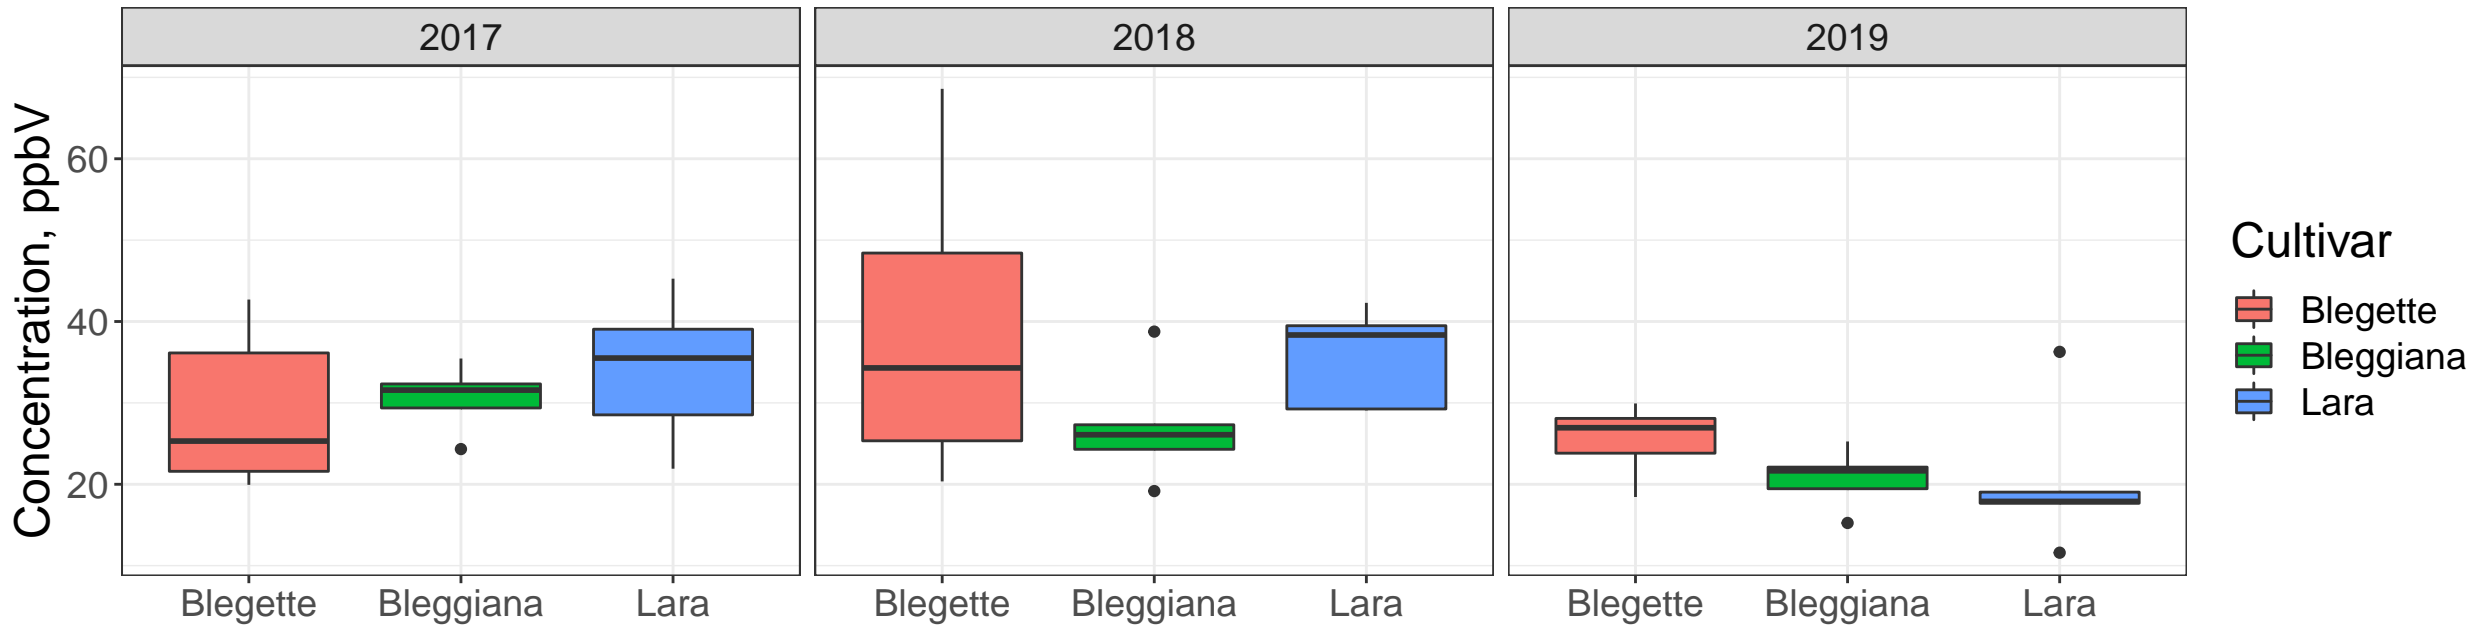

ms103.0778

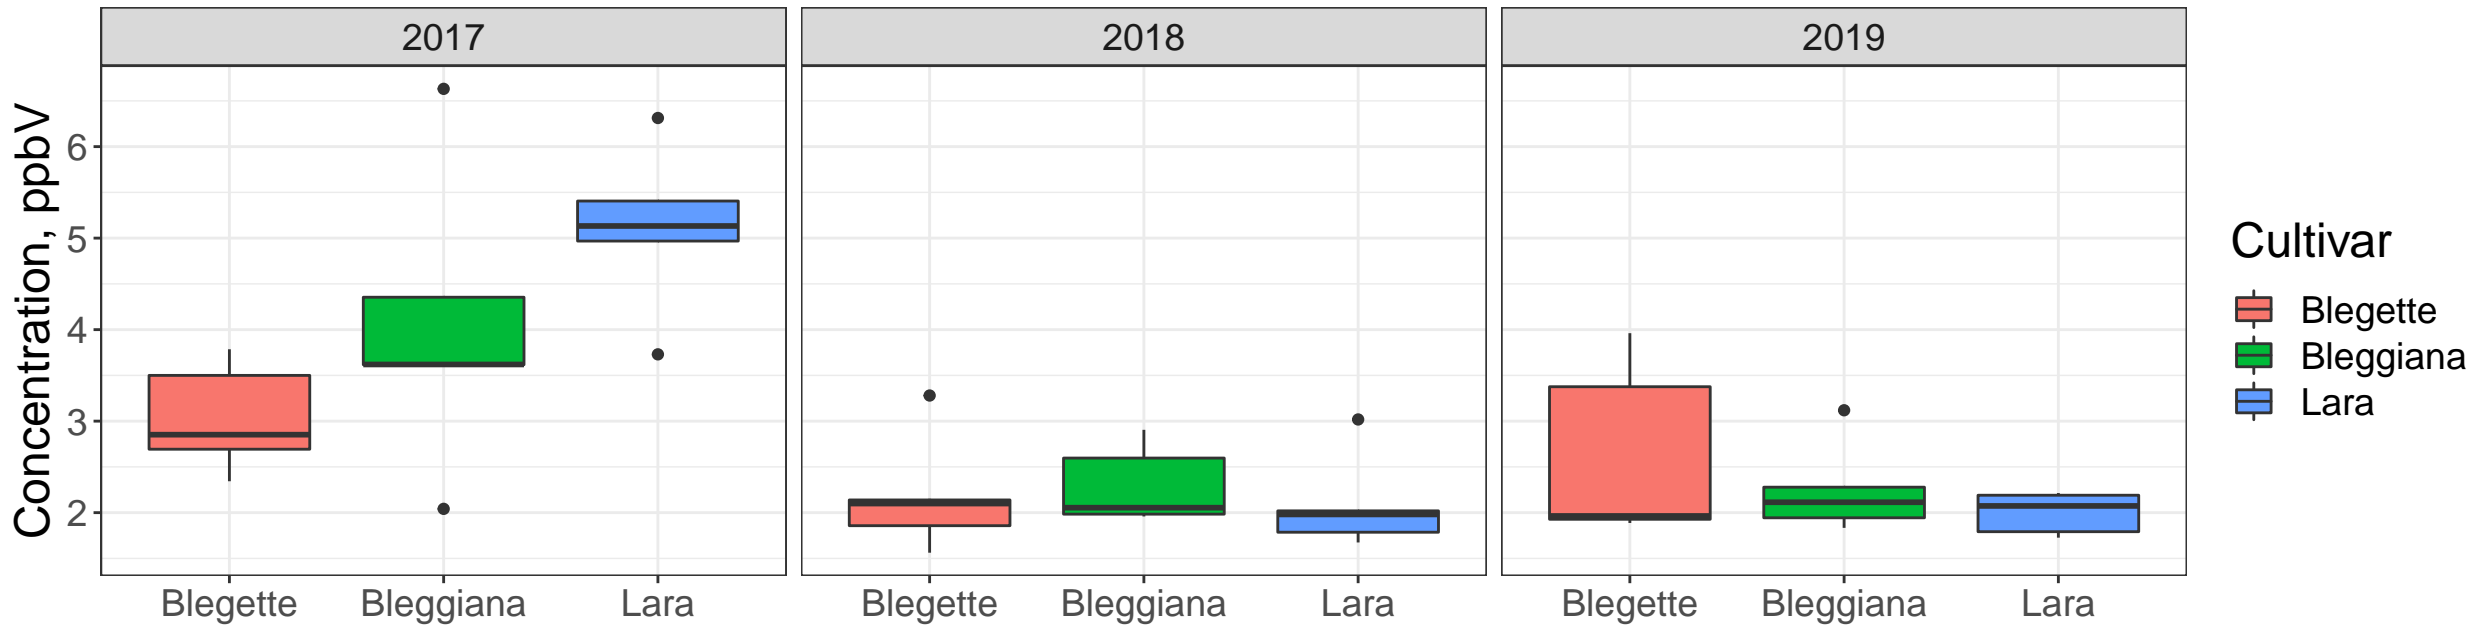

# ms104.0391

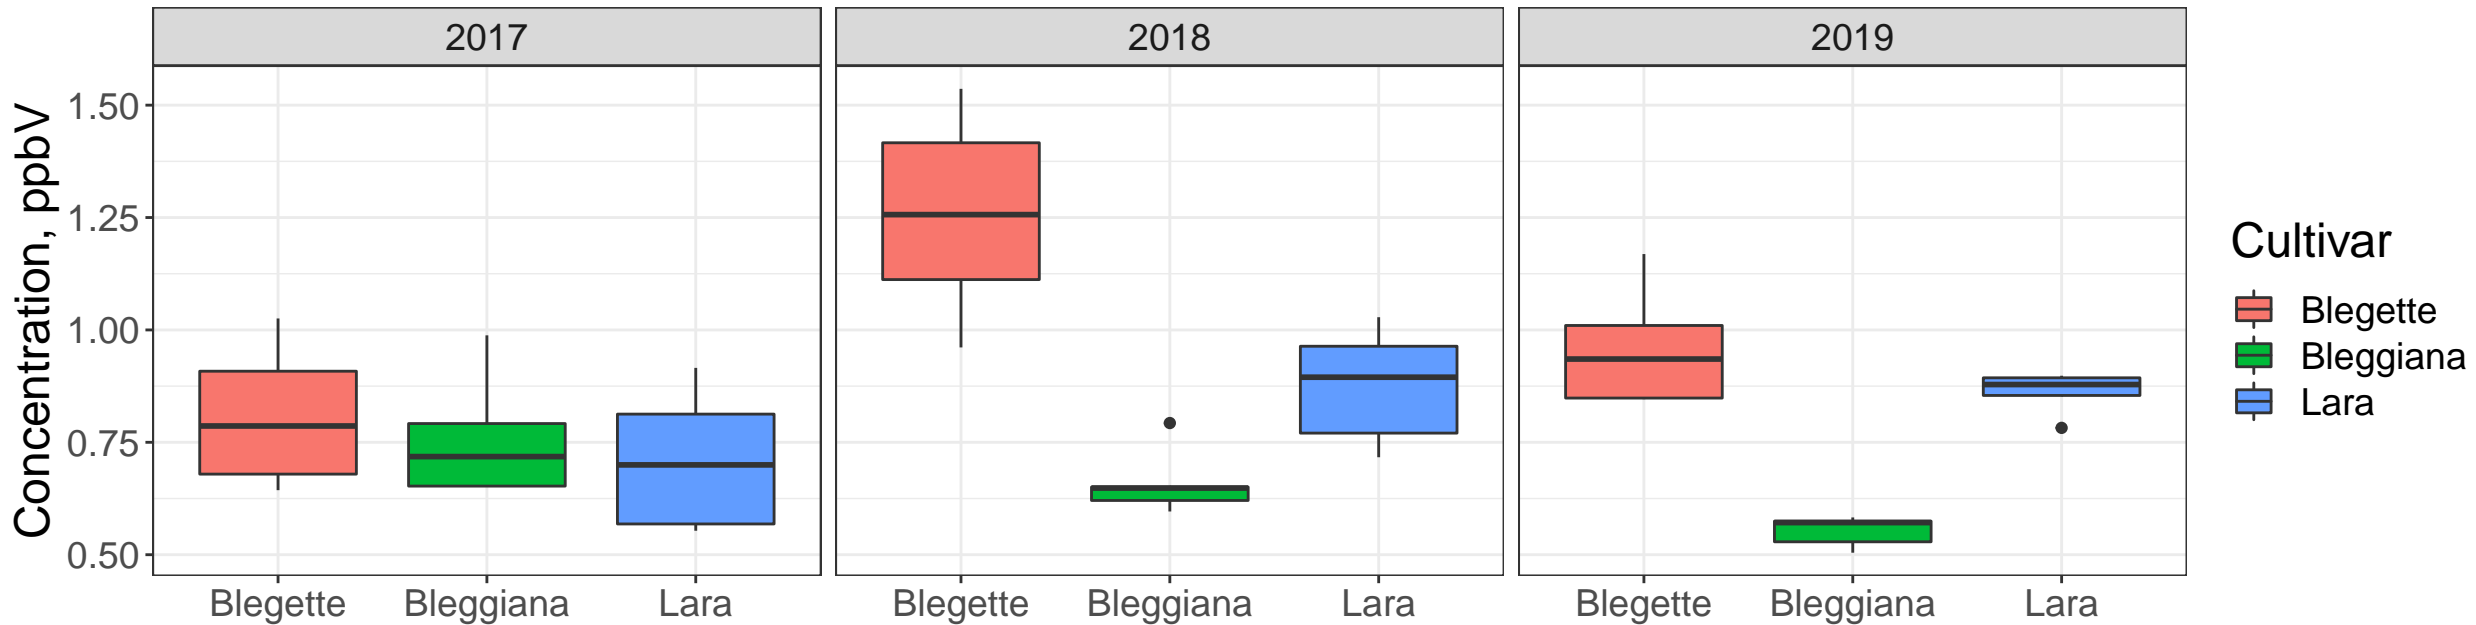

ms105.0862

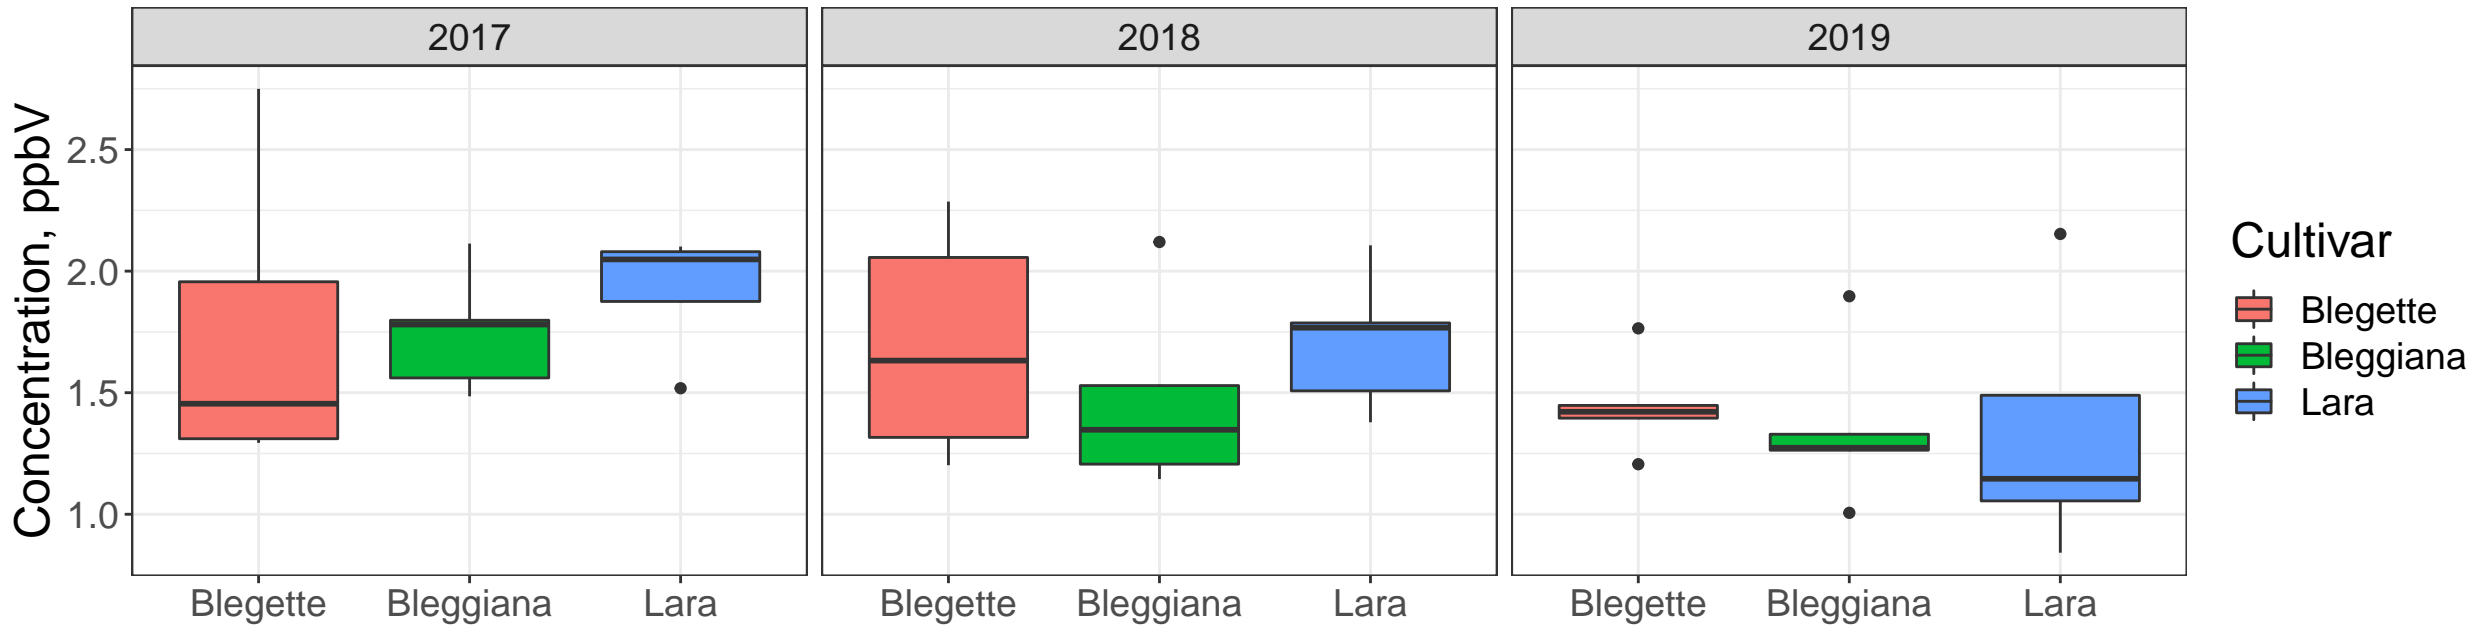

# ms107.0511

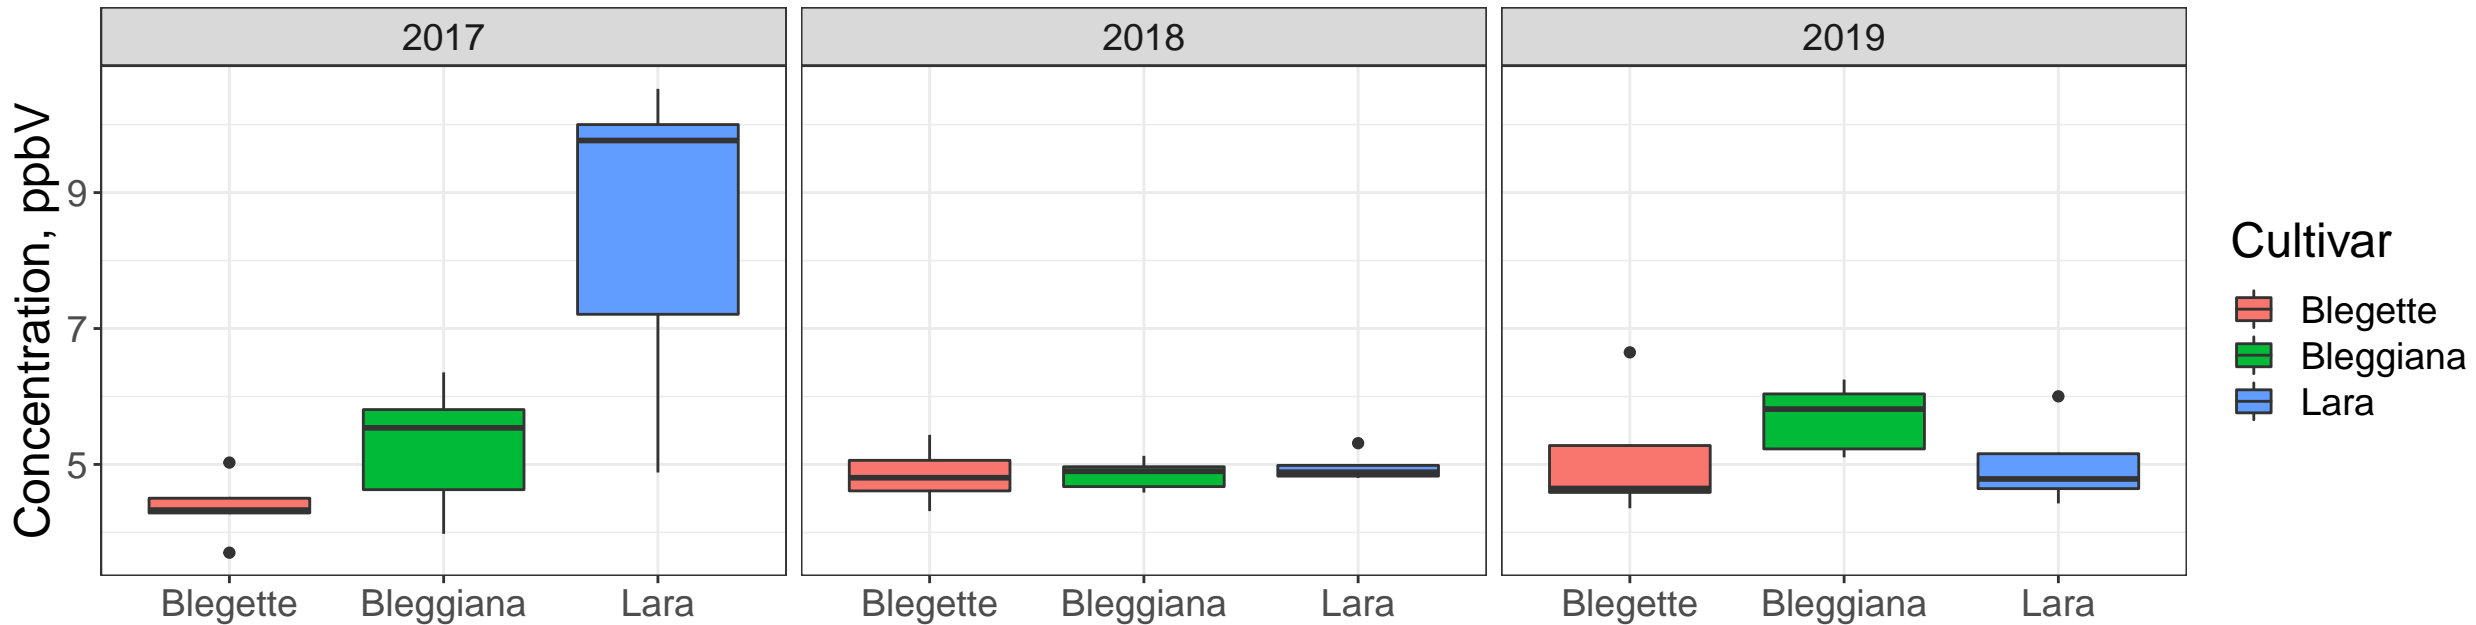

ms107.0828

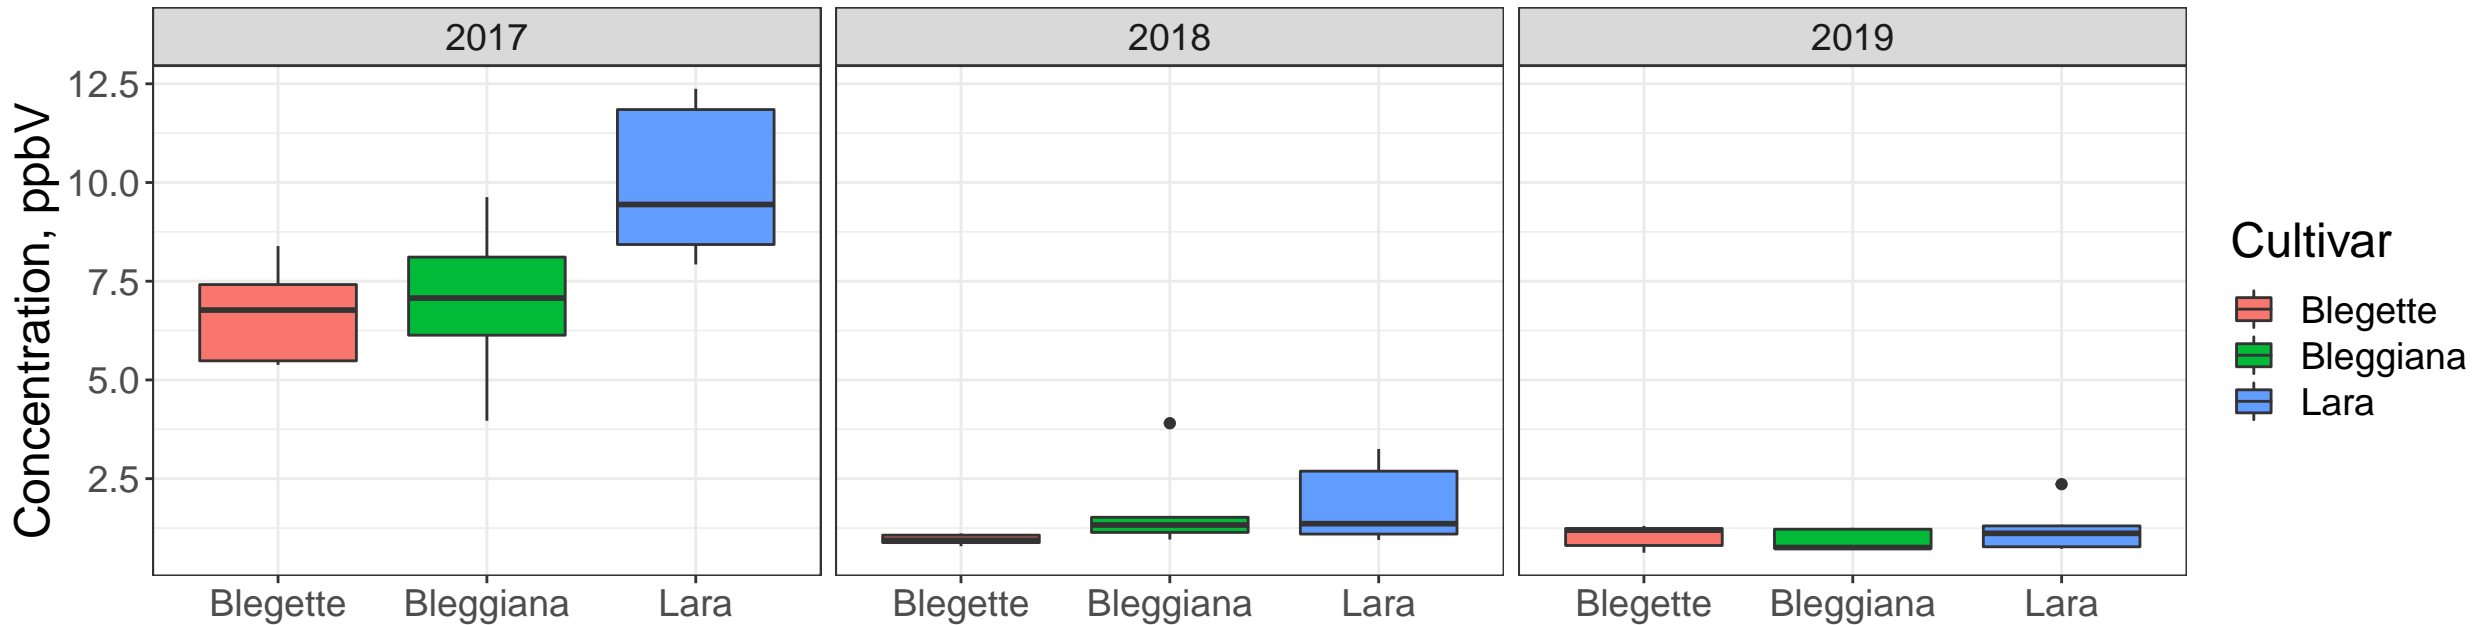



ms109.0263

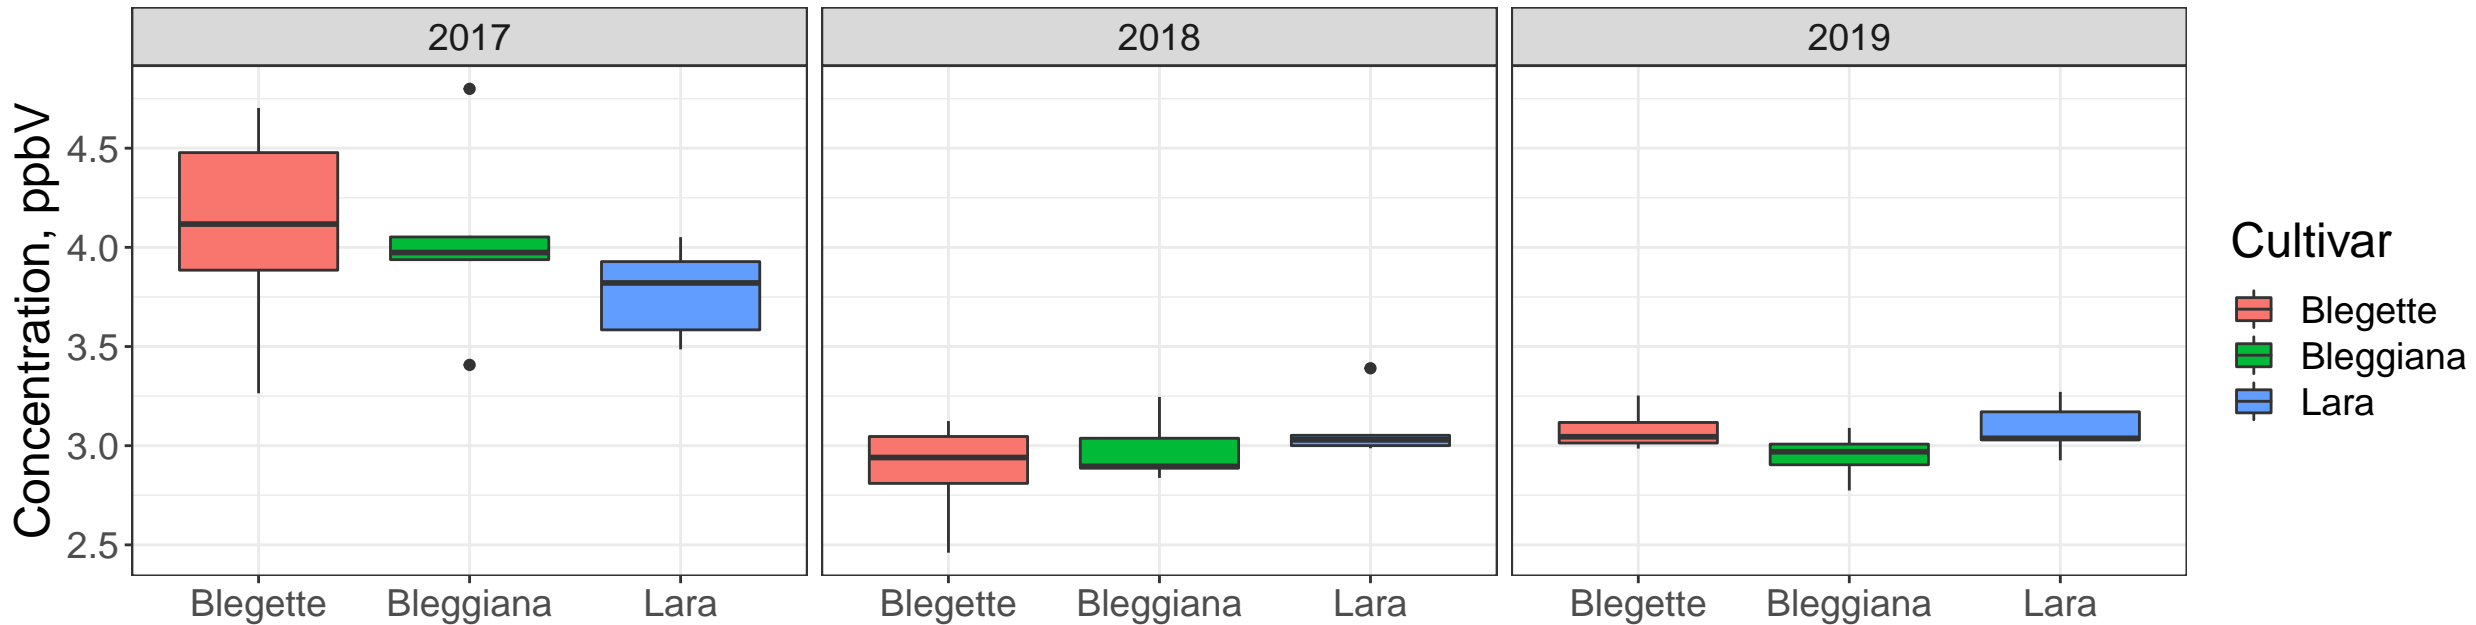

ms109.0687

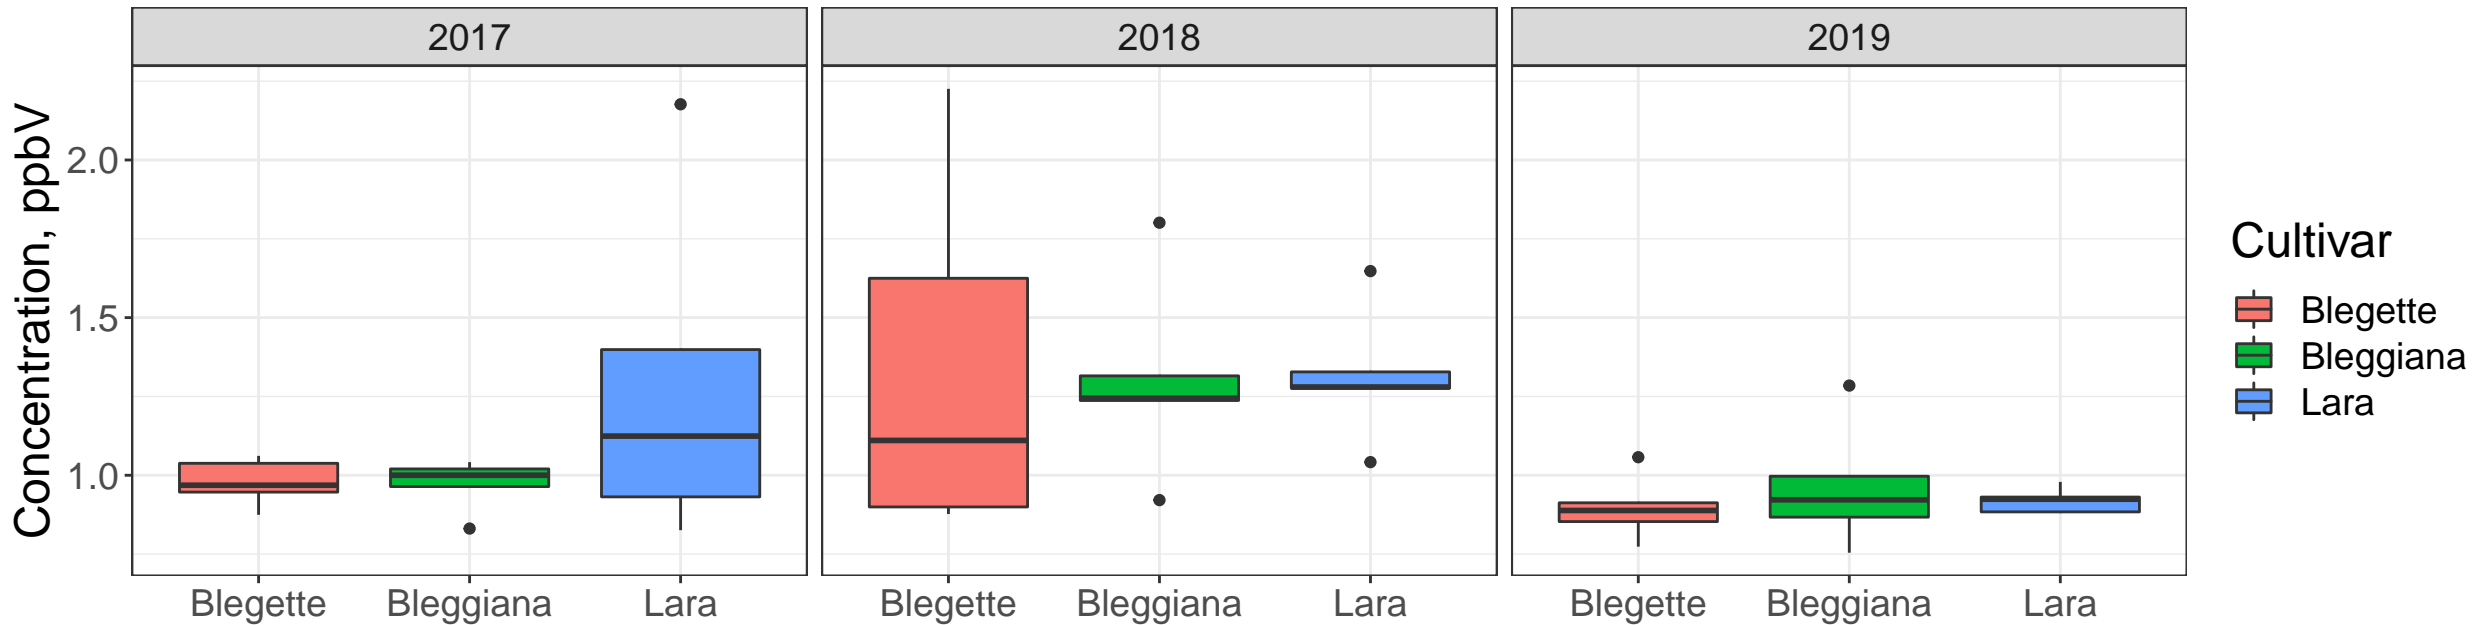

ms11.1052

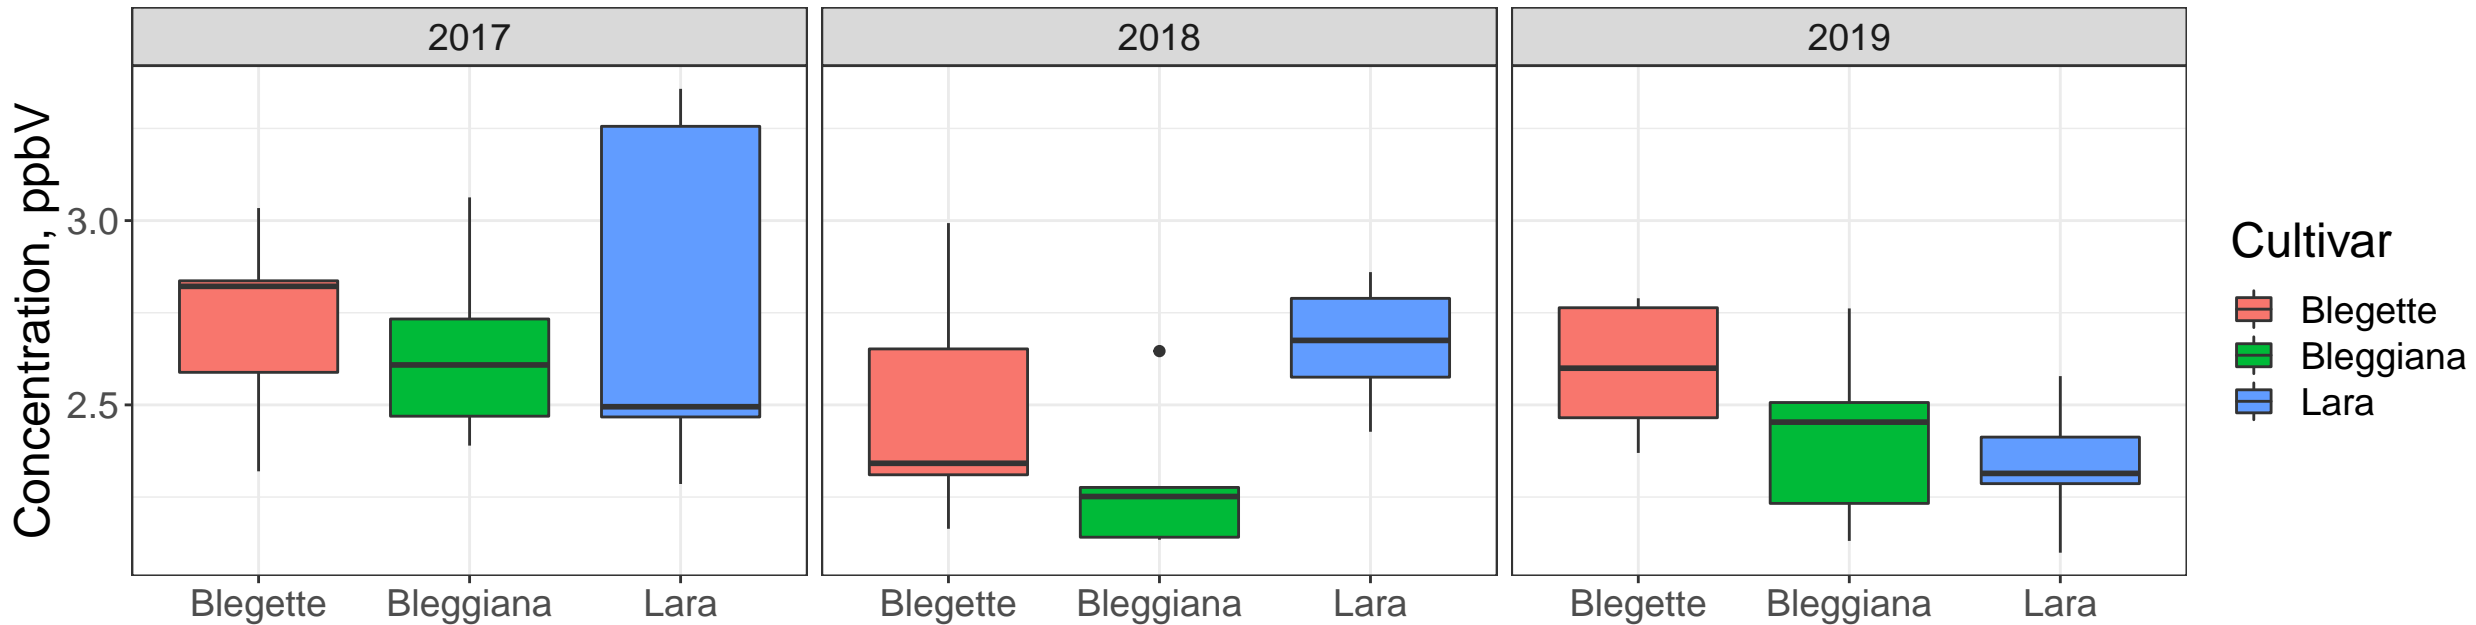

ms113.0895

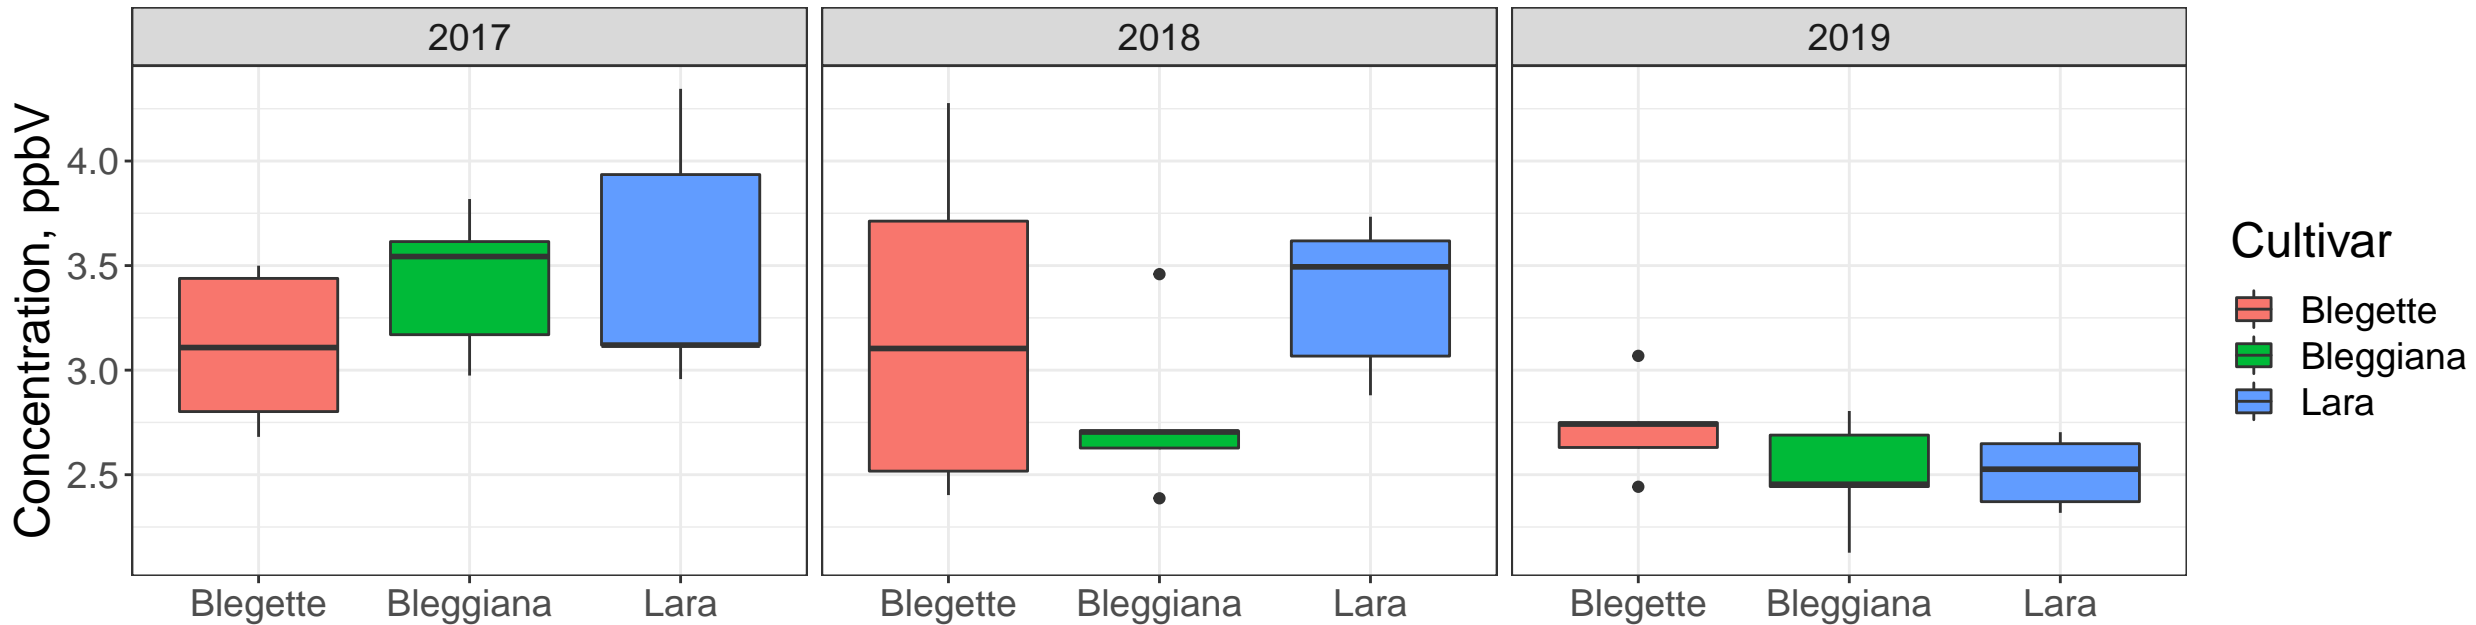

ms115.0805

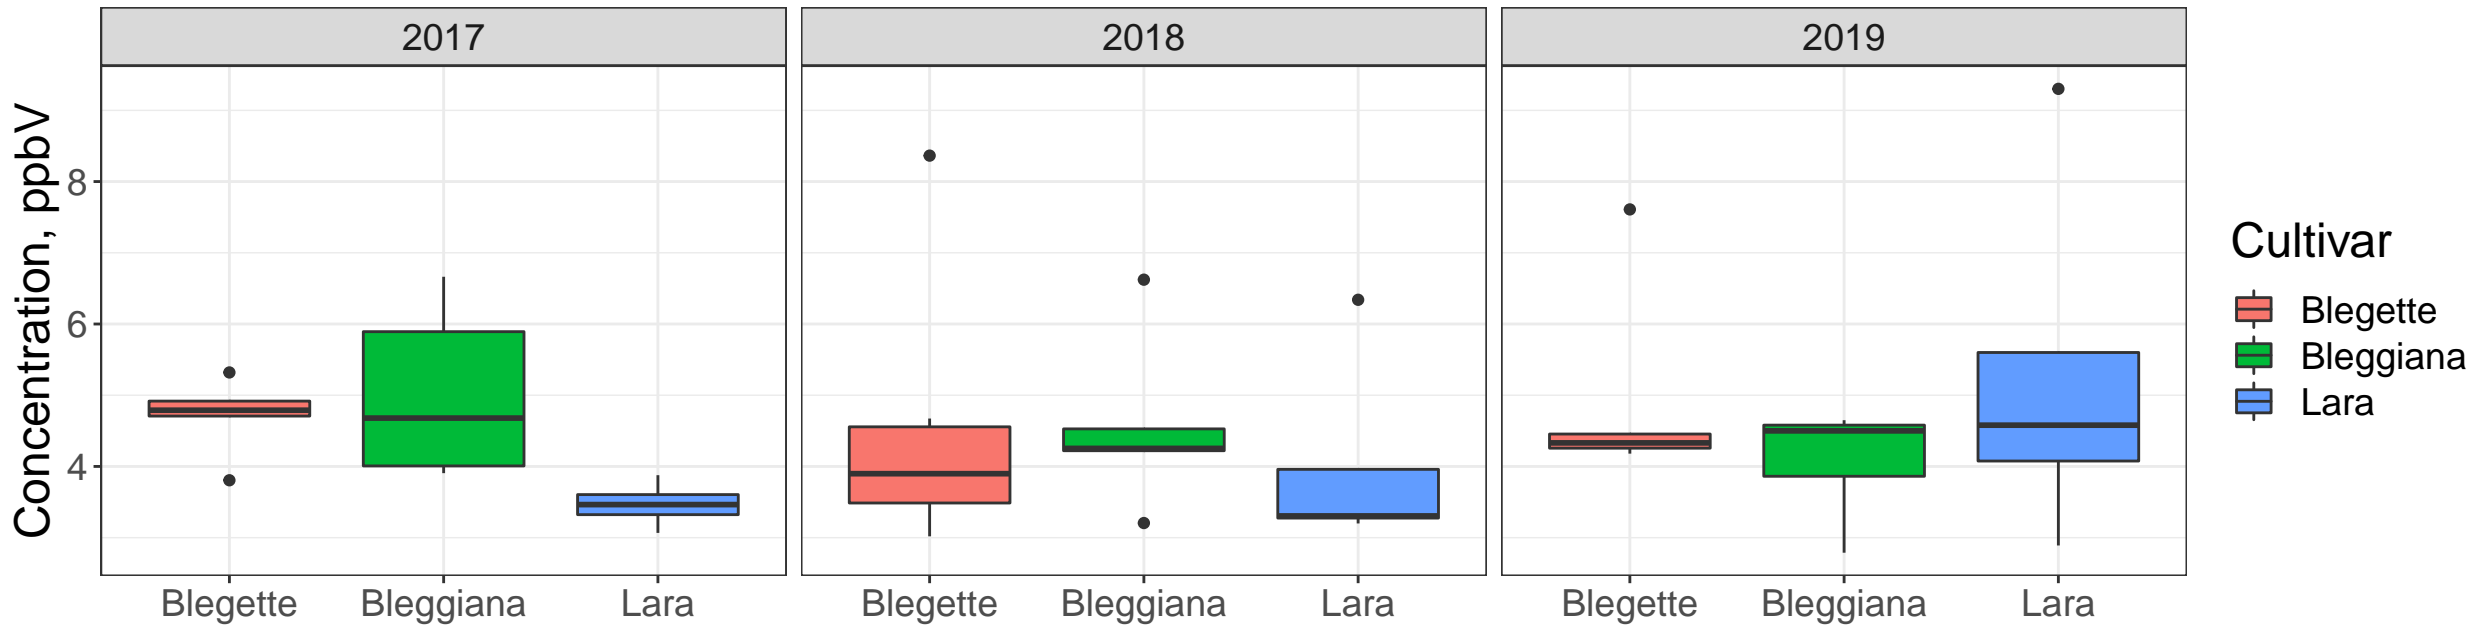

ms117.0917

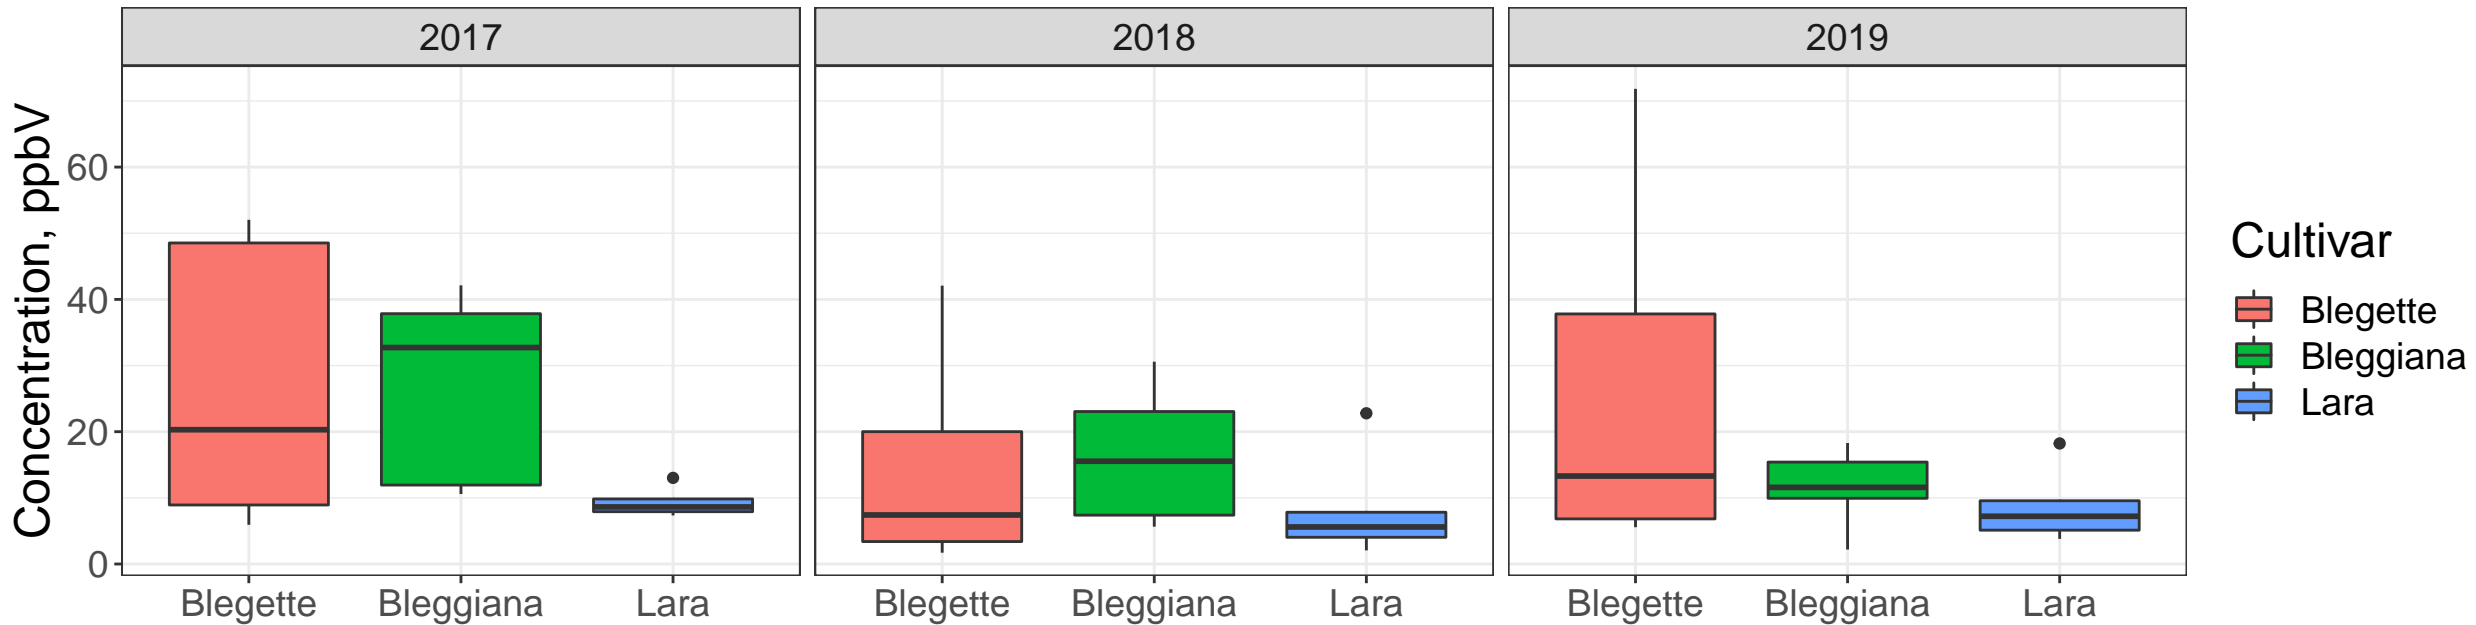

ms118.0421

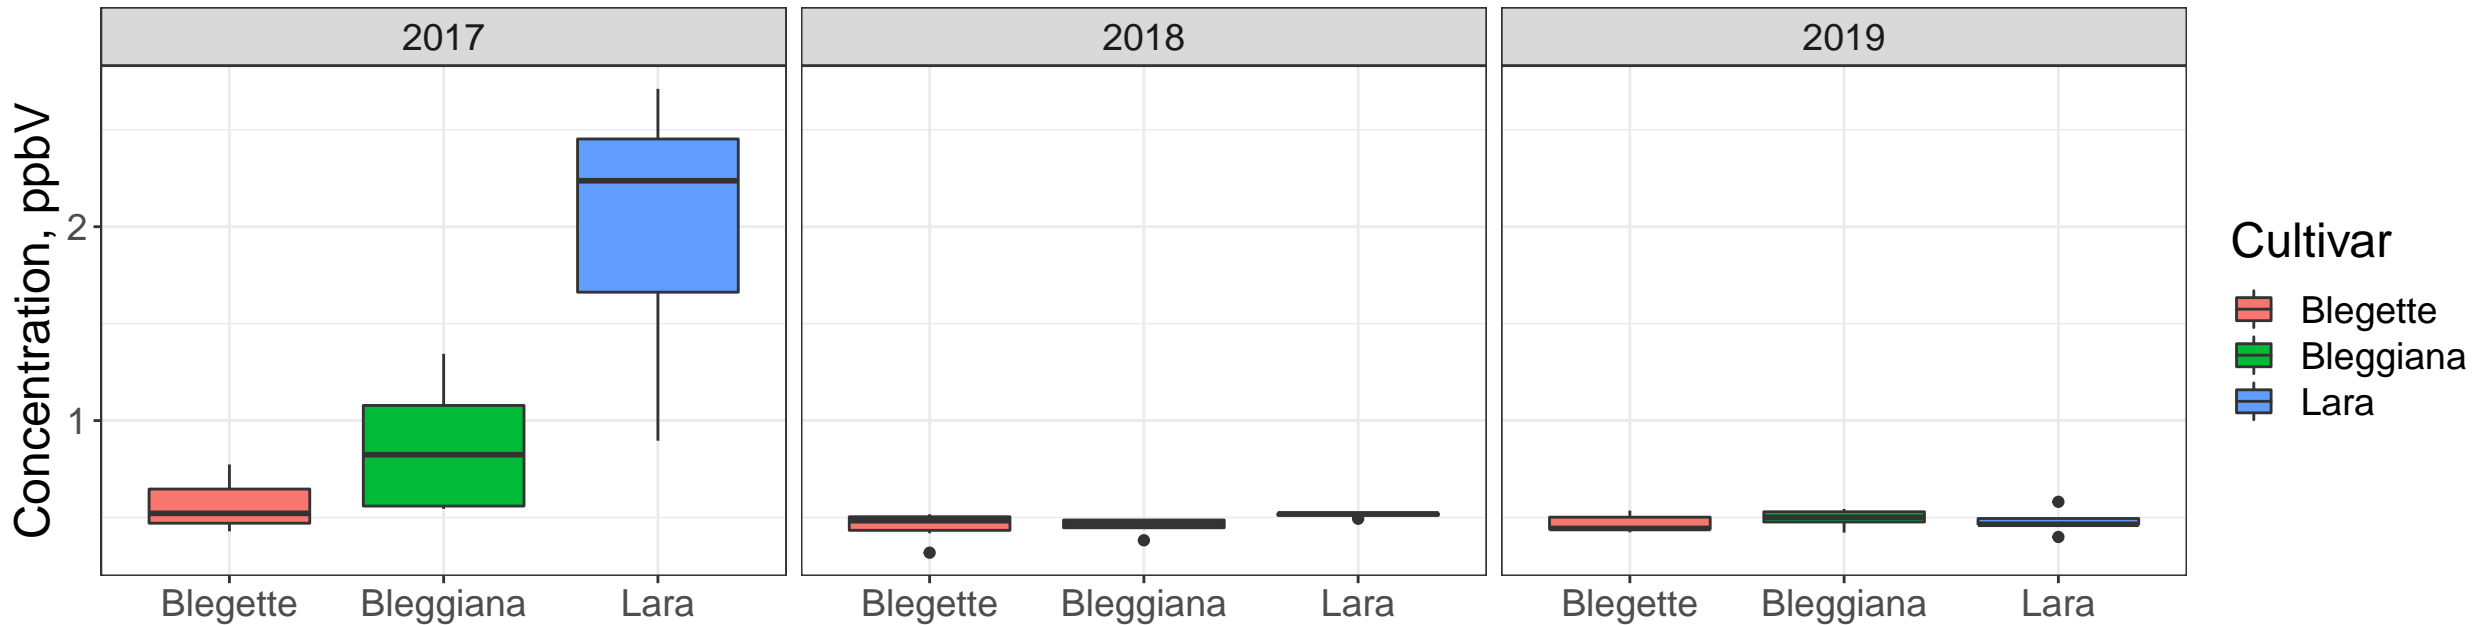

ms119.0961

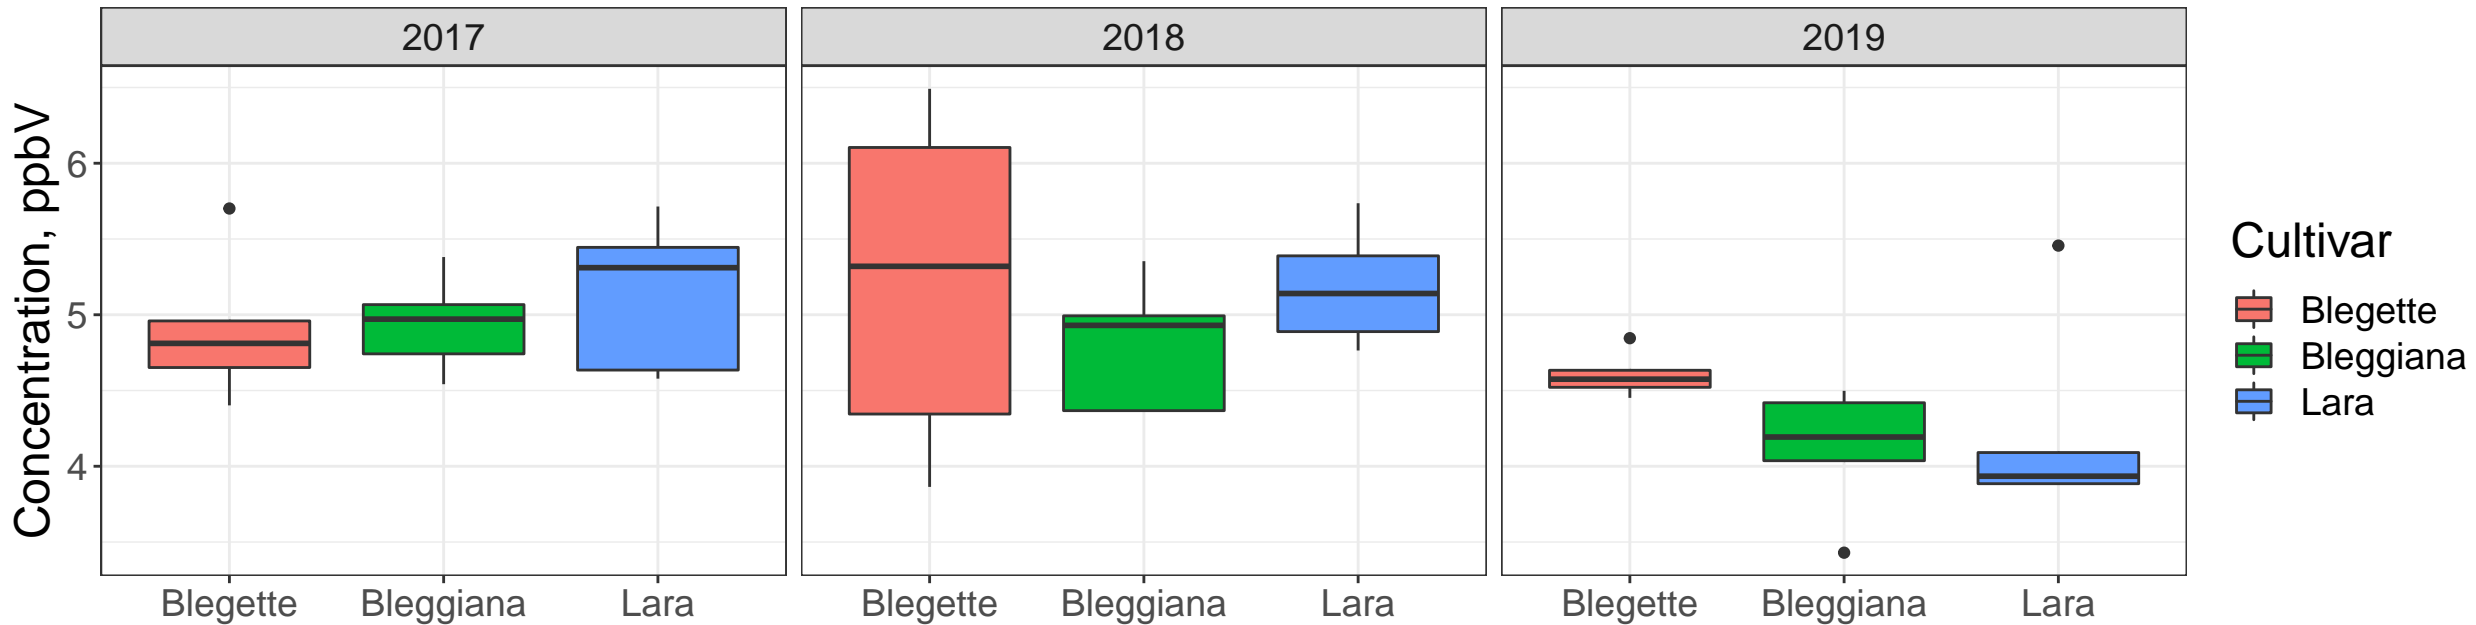



ms121.0673

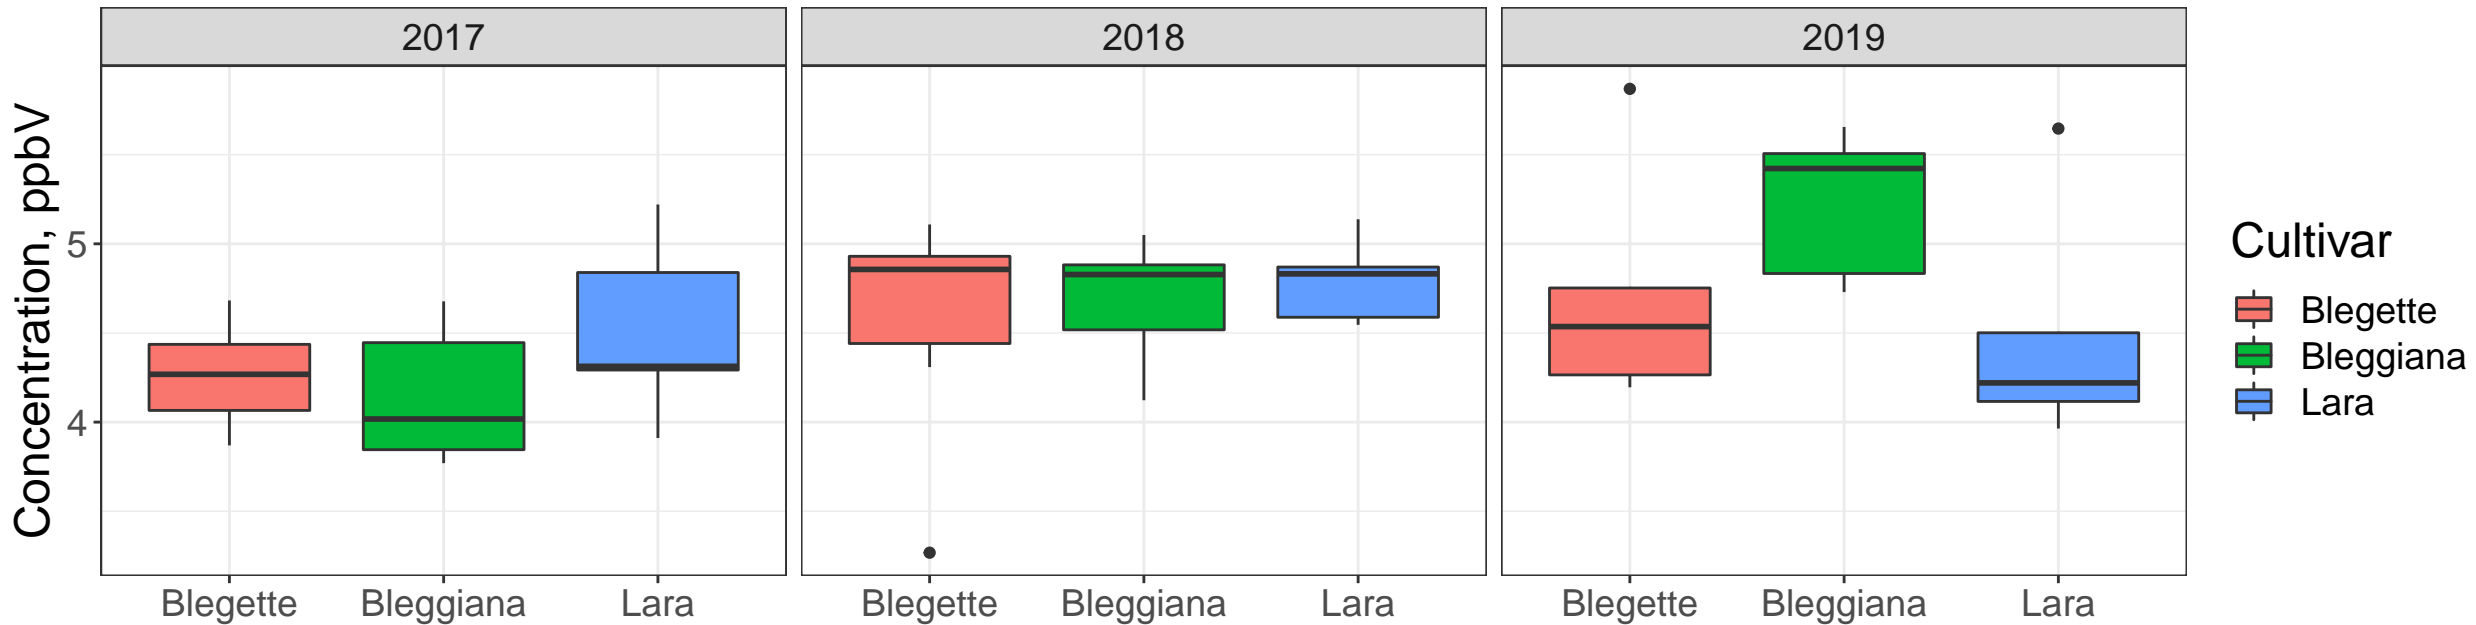

ms123.0466

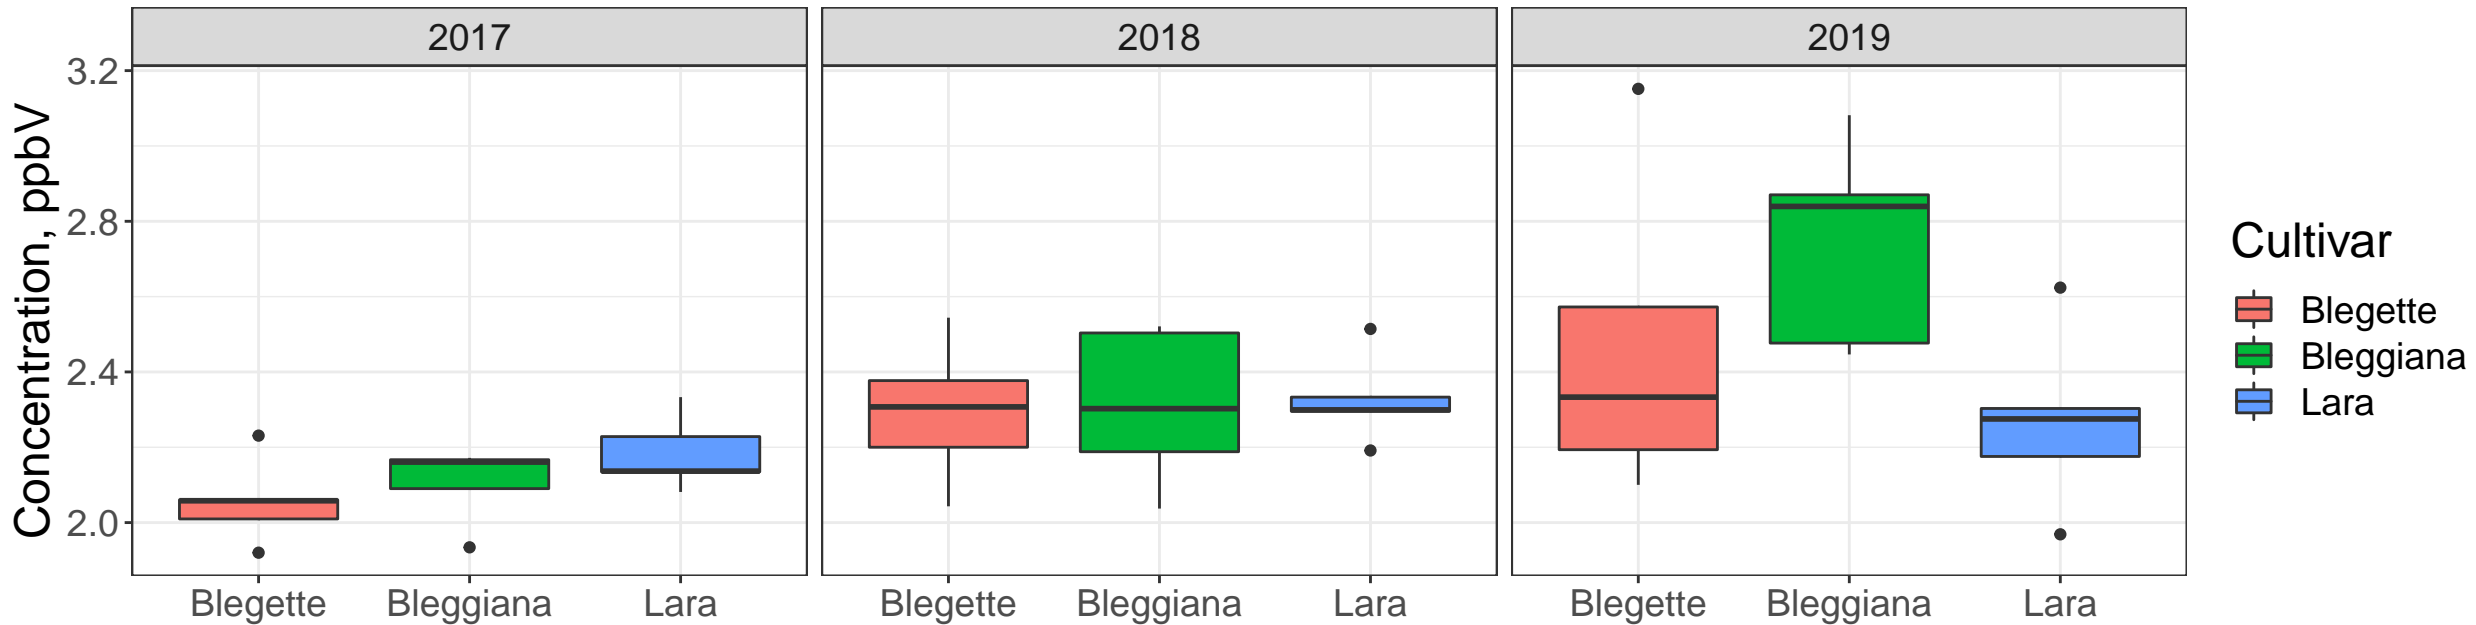

ms127.0388

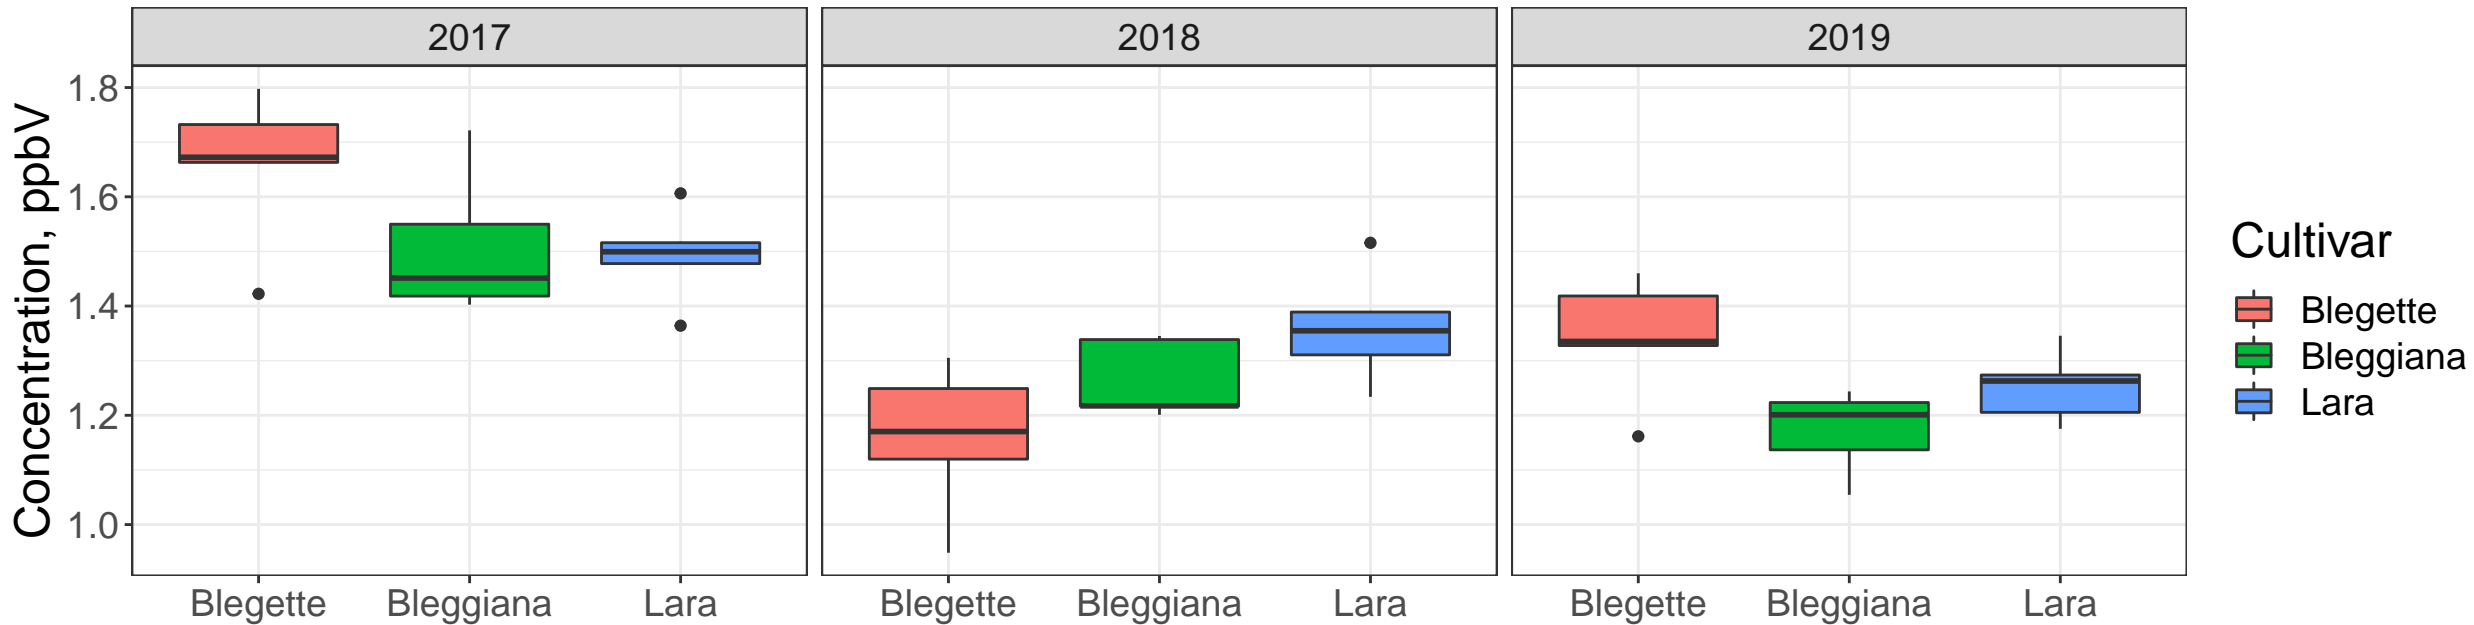

ms129.0923

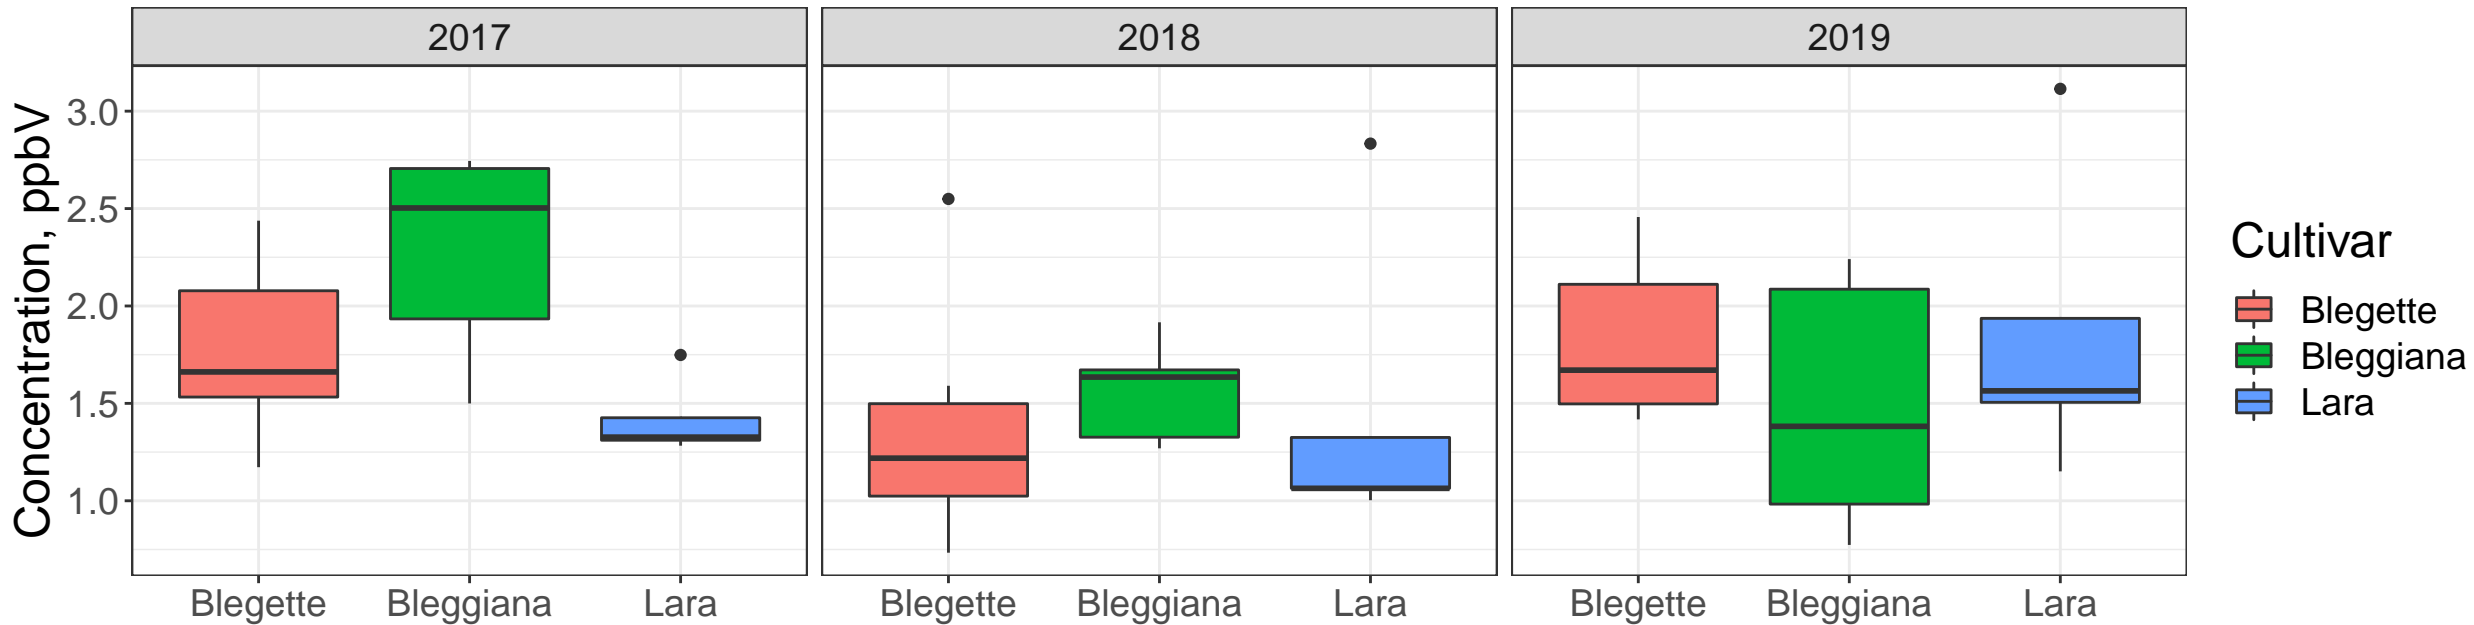

ms131.1079

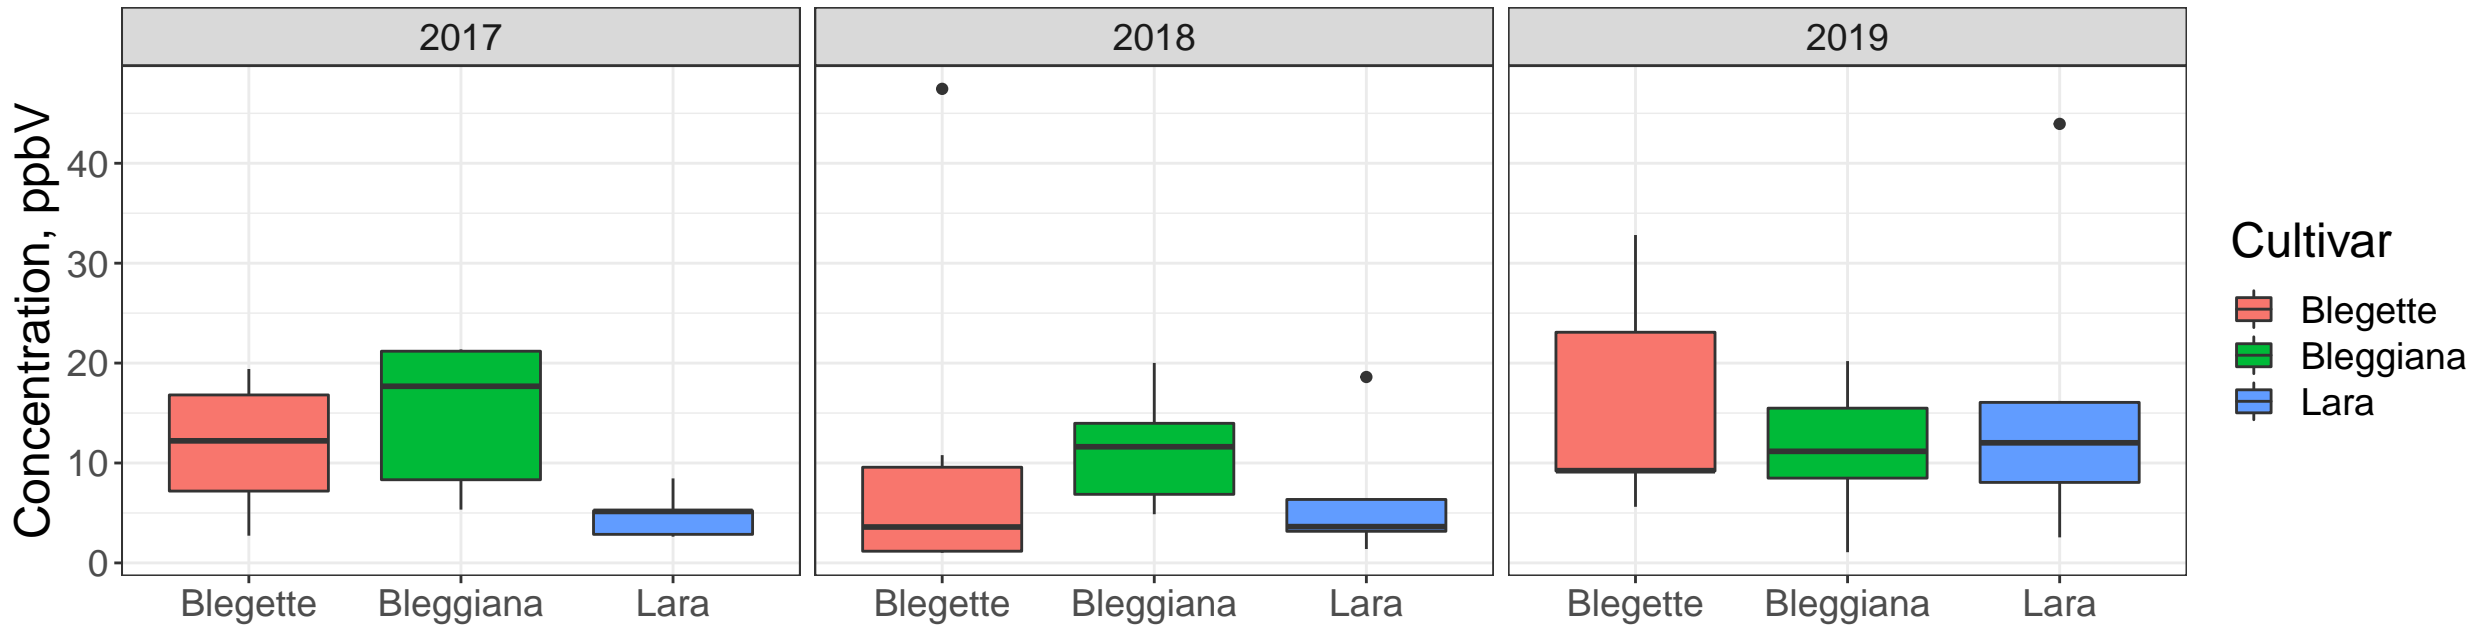

ms136.9575

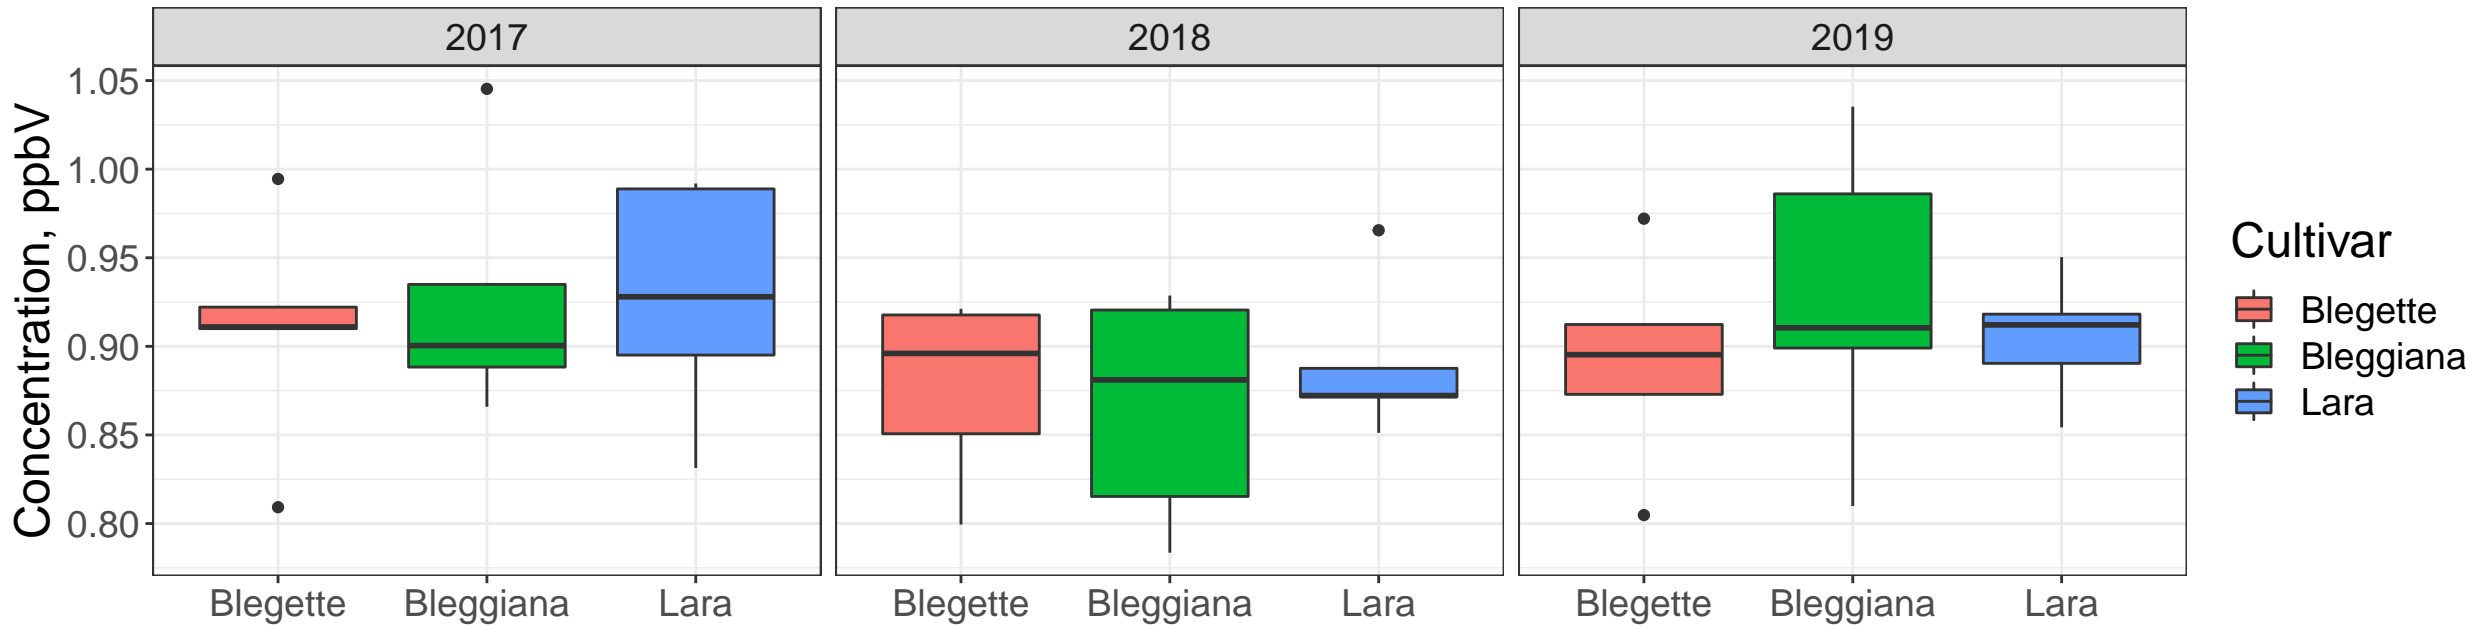

# ms139.1230

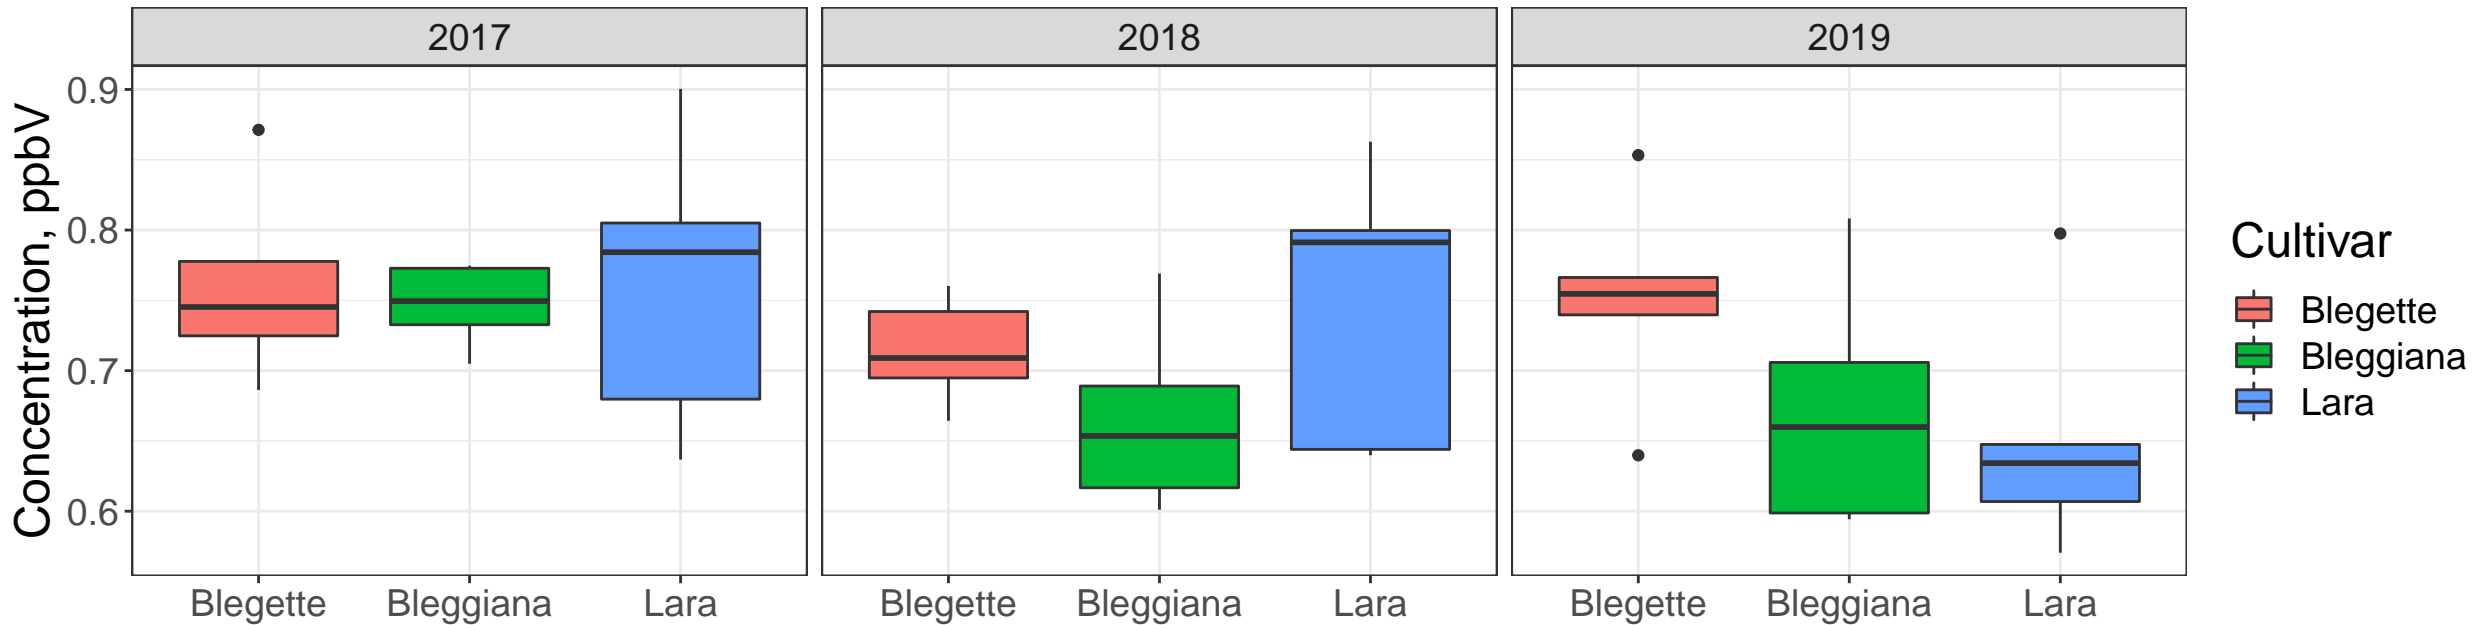

# ms145.1220

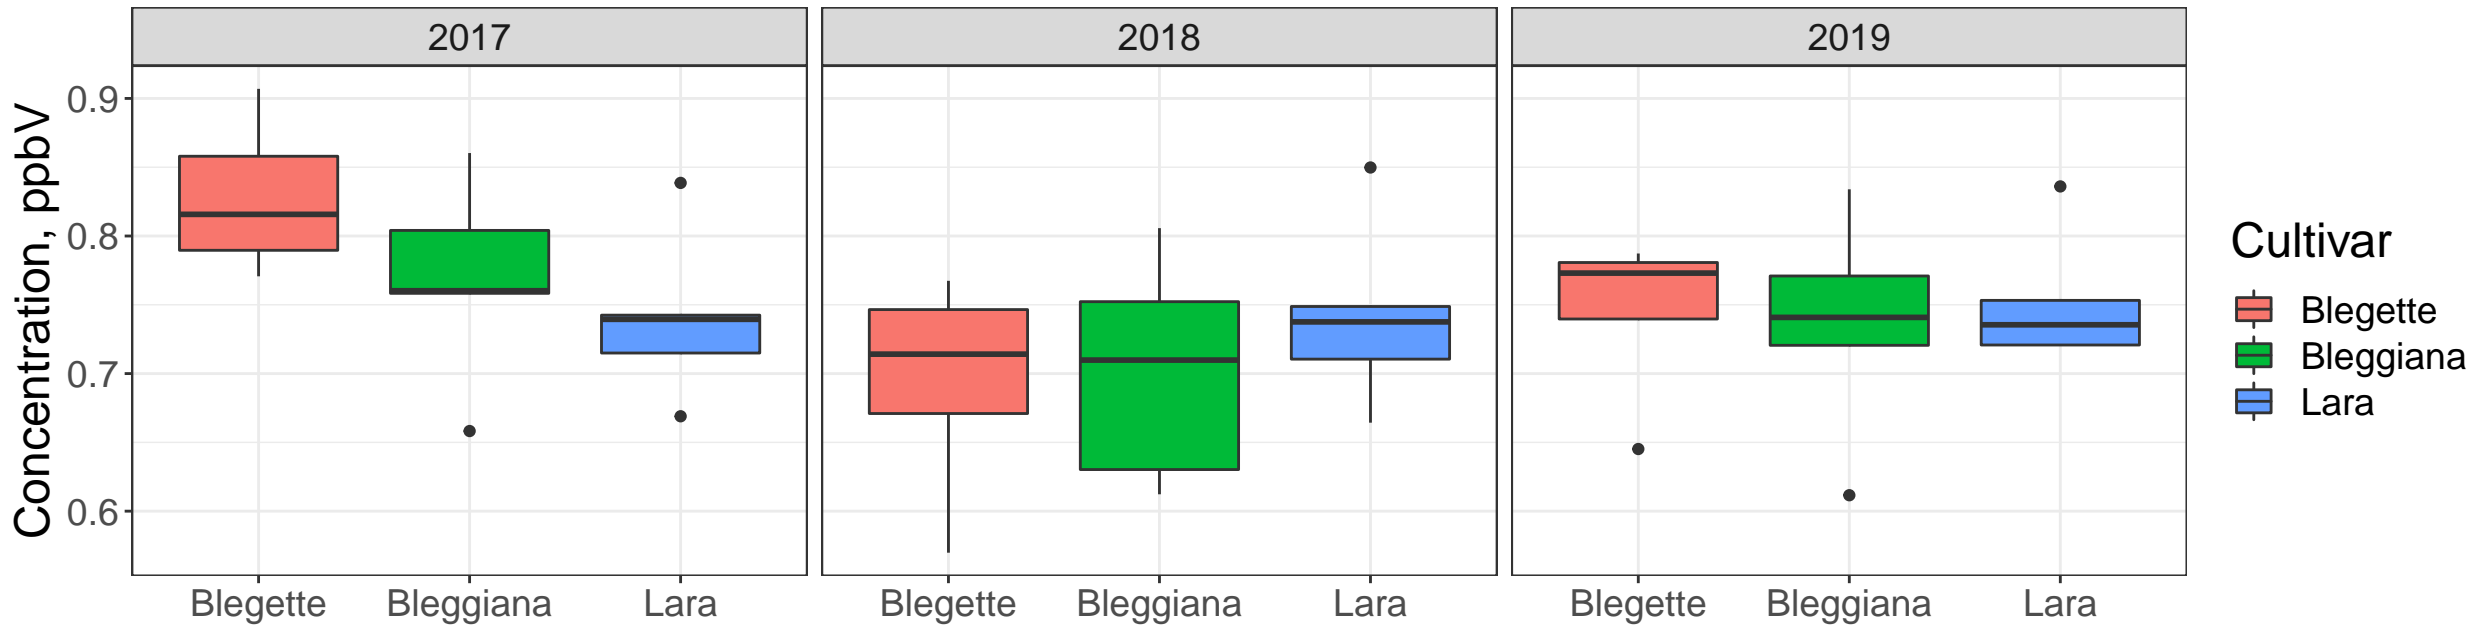



ms147.1029

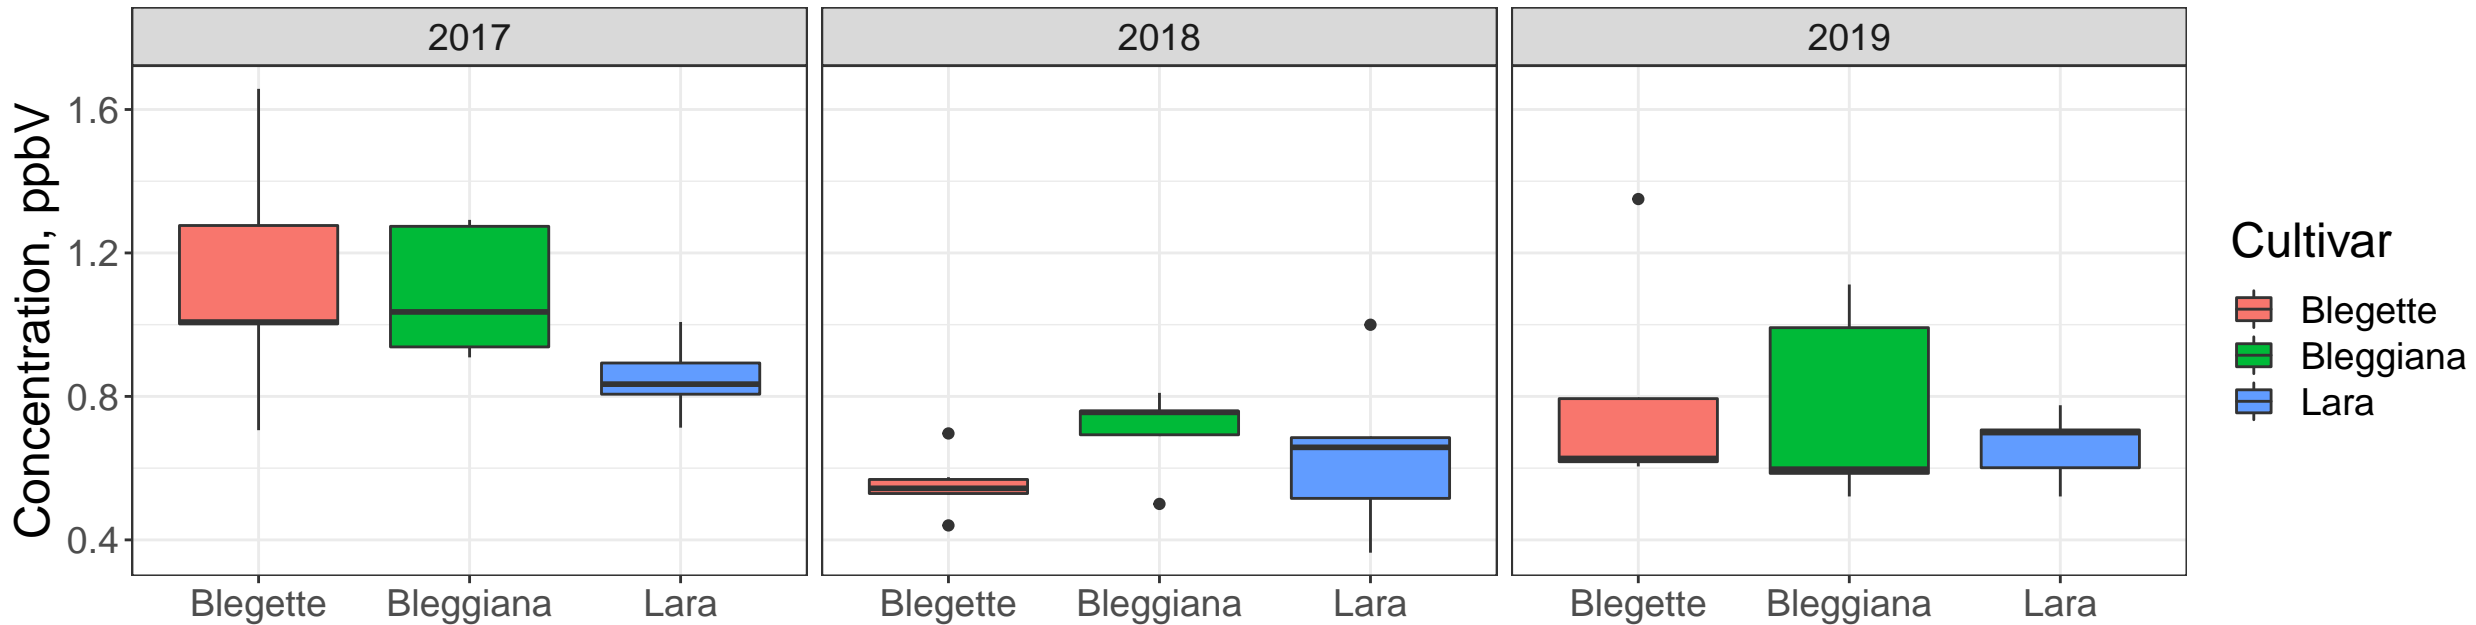

Supplement: s1 [file s1]
